1 **Title:** Erythropoietin directly remodels the clonal composition of murine  
2 hematopoietic multipotent progenitor cells

3

4 A.S. Eisele<sup>1</sup>, J. Cosgrove<sup>1</sup>, A. Magniez<sup>1</sup>, E. Tubeuf<sup>1</sup>, S. Tenreira Bento<sup>1</sup>, C. Conrad<sup>1</sup>,  
5 F. Cayrac<sup>1</sup>, T. Tak<sup>1</sup>, A.M. Lyne<sup>1</sup>, J. Urbanus<sup>2</sup> and L. Perié<sup>1\*</sup>.

6

## 7 **Affiliations**

8 1. Institut Curie, Université PSL, Sorbonne Université, CNRS UMR168, Laboratoi  
9 re Physico Chimie Curie, 75005 Paris, France

10 2. Netherlands Cancer Institute, Amsterdam, Netherlands

11

## 12 **Contact information**

13 **Leila Perié**, Postal address: UMR168, Institute Curie, 11 rue Pierre et Marie Curie,  
14 75005 Paris, [Leila.Perie@curie.fr](mailto:Leila.Perie@curie.fr), +33156246229.

15

16

17

18

19

20

21

22

23

24

25

26 **Abstract**

27 The cytokine erythropoietin (EPO) is a potent inducer of erythrocyte development and  
28 one of the most prescribed biopharmaceuticals. The action of EPO on erythroid  
29 progenitor cells is well established, but its direct action on hematopoietic stem and  
30 progenitor cells (HSPCs) is still debated. Here, using cellular barcoding, we traced the  
31 differentiation of hundreds of single murine HSPCs, after *ex vivo* EPO-exposure and  
32 transplantation, in five different hematopoietic cell lineages, and observed the transient  
33 occurrence of high-output Myeloid-Erythroid-megaKaryocyte (MEK)-biased and  
34 Myeloid-B-cell-Dendritic cell (MBDC)-biased clones. Single-cell RNA sequencing  
35 (ScRNAseq) analysis of *ex vivo* EPO-exposed HSPCs revealed that EPO induced the  
36 upregulation of erythroid associated genes in a subset of HSPCs, overlapping with  
37 multipotent progenitor (MPP) 1 and MPP2. Transplantation of Barcoded EPO-  
38 exposed-MPP2 confirmed their enrichment in Myeloid-Erythroid-biased clones.  
39 Collectively, our data show that EPO does act directly on MPP independent of the  
40 niche, and modulates fate by remodeling the clonal composition of the MPP pool.

41

42 **Introduction**

43 Erythrocytes are the most numerous hematopoietic cells in our body and are constantly  
44 renewed<sup>1</sup>. The major inducer of erythroid cell development in steady state and anemic  
45 conditions is the cytokine EPO<sup>2</sup>. Recombinant EPO is widely used to treat anemia and  
46 is one of the most sold biopharmaceuticals<sup>3</sup>. Previously, EPO was thought to solely  
47 target erythroid-committed progenitors and induce their increased proliferation and  
48 survival via the EPO receptor (EPOR)<sup>4</sup>. Recently, EPO has also been suggested to act  
49 on HSPCs<sup>5-12</sup>, but the nature of EPO's effect on HSPC fate remains unresolved

50 despite potential adverse side effects during long-term EPO usage in the clinics and  
51 associations of high EPO levels with leukemias<sup>13–15</sup>.

52 It is well established that EPO can induce HSPCs to cycle, as evidenced by a number  
53 of bulk and single cell studies *in vitro* and *in vivo*<sup>5,12,8,9,11</sup>. It's role in modulating HSPC  
54 fate is less clear however, with a lack of studies that functionally assess HSPC fate at  
55 the single cell level *in vivo*, and analyze the direct effect of EPO on HSPCs, and not  
56 the effect of the surrounding niche. More specifically, the upregulation of erythroid  
57 associated genes in HSPC (LSK CD150<sup>+</sup> Flt3<sup>-</sup> CD48<sup>-</sup>) in response to *in vivo* EPO has  
58 been observed with bulk transcriptomics<sup>11</sup>, suggesting that HSPCs deviate their fate  
59 toward erythroid production. Recent ScRNAseq analysis observed different changes  
60 of lineage-associated gene expressions after *in vivo* EPO-exposure of HSPCs<sup>9,8</sup>. As  
61 changes of gene expression do not necessarily result in cell fate modification<sup>14</sup>,  
62 functional validations *in vivo* are necessary. In one study such functional validation was  
63 performed using bulk transplantation of *in vivo* EPO-exposed HSPCs (LSK CD150<sup>+</sup>  
64 Flt3<sup>-</sup>)<sup>7</sup>. This study showed increased erythroid production and decreased myeloid cell  
65 production, concluding that EPO deviates the fate of HSPCs in favor of erythroid  
66 production. As EPO has also been shown to target hematopoietic niche cells  
67 (osteoblasts and osteocytes<sup>15,16</sup> endothelial cells<sup>17,16</sup>, adipocytes<sup>18,19</sup>, and  
68 mesenchymal stem cells<sup>6,20</sup>), it remains however still unclear whether EPO acts directly  
69 on HSPCs, via their environment, or both.

70 It is now established that HSPCs encompass cells with different long-term  
71 reconstitution capacity after transplantation, as well as a heterogeneous output in  
72 terms of quantity (lineage-bias) and type of cells (lineage-restriction)<sup>21–28</sup>. Recently, the  
73 HSPC compartment was subdivided into long-term hematopoietic stem cells (LT-HSC)  
74 and different multipotent progenitors (MPP) (MPP1-4<sup>29,30</sup>), with variation around the

75 phenotypic definition<sup>31</sup>. Interestingly, HSPC composition responds to irradiation with  
76 HSC transiently self-renewing less and increasing their production of MPP2-3<sup>31</sup>. In the  
77 case of EPO, conflicting results suggest that either HSC or MPP respond to EPO<sup>8,9,11</sup>  
78 but the difference in HSPC definition and the lack of functional validation make it  
79 difficult to compare these studies. As HSPCs are functionally heterogeneous, and the  
80 current phenotypic definition partially capture this heterogeneity, a single cell *in vivo*  
81 lineage tracing approach is needed to assess whether EPO can influence HSPC fate  
82 decisions.

83 To analyze the functional effect of EPO on the differentiation of individual HSPCs (C-  
84 Kit<sup>+</sup> Sca1<sup>+</sup> CD150<sup>+</sup> Flt3<sup>-</sup>) removing the effect of the niche, we here utilized cellular  
85 barcoding technology which allowed us to trace the progeny of hundreds of single  
86 HSPCs *in vivo*. By analyzing cellular barcodes in five mature hematopoietic lineages  
87 and HSPCs, we observed transient induction of high-output MEK-biased barcode  
88 clones compensated by MBDC-biased clones after *ex vivo* EPO-exposure. ScRNAseq  
89 of *ex vivo* EPO-exposed HSPCs revealed upregulation of erythroid associated genes  
90 in a subset of the compartment with overlap to gene signatures of MPP1 (C-Kit<sup>+</sup> Sca1<sup>+</sup>  
91 Flt3<sup>-</sup> CD150<sup>+</sup> CD48<sup>-</sup> CD34<sup>+</sup>), and MPP2 (C-Kit<sup>+</sup> Sca1<sup>+</sup> Flt3<sup>-</sup> CD150<sup>+</sup> CD48<sup>+</sup>)<sup>30,29</sup> and not  
92 of LT-HSCs (C-Kit<sup>+</sup> Sca1<sup>+</sup> Flt3<sup>-</sup> CD150<sup>+</sup> CD48<sup>-</sup> CD34<sup>-</sup>). Transplantation of barcoded  
93 MPP2 confirmed their enrichment in ME-biased clones in response to EPO. Moreover,  
94 the increased contribution of biased HSPC clones to the mature cell lineages after  
95 EPO-exposure did not match their frequency in HSPCs, indicating that they were  
96 differentiating more than self-renewing, a property associated to multipotent  
97 progenitors. The transient effect of EPO on HSPCs further corroborates an action of  
98 EPO on MPP1/2 rather than LT-HSCs. Altogether our results are consistent with a  
99 model in which perturbations induce clonal remodeling of HSPC contributing to

100 hematopoiesis, with biased MPPs transiently contributing more than LT-HSC. They  
101 also demonstrate a direct effect of EPO on MPPs after transplantation with implications  
102 for basic HSC research and therapeutic applications in the clinic.

103

## 104 **Results**

105 **EPO-exposure induces biases in single HSPCs.** Given the debate surrounding  
106 which HSPC subset is responding to EPO, we decided to analyzed the direct effect of  
107 EPO on the differentiation of HSPCs defined as C-Kit<sup>+</sup> Sca1<sup>+</sup> Flt3<sup>-</sup> CD150<sup>+</sup>  
108 (encompassing LT-HSC (C-Kit<sup>+</sup> Sca1<sup>+</sup> Flt3<sup>-</sup> CD150<sup>+</sup> CD48<sup>-</sup> CD34<sup>-</sup>), MPP1 (C-Kit<sup>+</sup>  
109 Sca1<sup>+</sup> Flt3<sup>-</sup> CD150<sup>+</sup> CD48<sup>-</sup> CD34<sup>+</sup>), and MPP2 (C-Kit<sup>+</sup> Sca1<sup>+</sup> Flt3<sup>-</sup> CD150<sup>+</sup> CD48<sup>+</sup>)<sup>30,29</sup>)  
110 at the single cell level by cellular barcoding. To this purpose, we generated a new high-  
111 diversity lentiviral barcode library (LG2.2, 18,026 barcodes in reference list), consisting  
112 of random 20 nucleotides sequences positioned adjacent to the green fluorescent  
113 protein (GFP) gene, enabling the tracking of many individual cells in parallel. Using this  
114 LG2.2 library, we labeled single HSPCs (Figure 1- figure supplement 1a) with unique  
115 genetic barcodes as previously described<sup>33</sup>, exposed them to EPO (1,000 ng/ml) or  
116 PBS for 16 hours *ex vivo* and transplanted around 2,600 cells (Mean 2,684 cells +/-  
117 175 cells) of which around 10% barcoded cells into irradiated mice (Figure 1a). Note  
118 that HSPCs kept their sorting phenotype after *ex vivo* culture albeit a slight  
119 downregulation of C-Kit<sup>44</sup> and Flt3 (Figure 1 – figure supplement 1f). At day 30 after  
120 transplantation, the earliest timepoint at which HSPCs produce simultaneously  
121 erythroid, myeloid and lymphoid cells<sup>45</sup>, barcoded (GFP<sup>+</sup>) erythroblasts (E; Ter119<sup>+</sup>  
122 CD44<sup>+34</sup>), myeloid cells (M; Ter119<sup>-</sup> CD19<sup>-</sup> CD11c<sup>-</sup> CD11b<sup>+</sup>), and B-cells (B; Ter119<sup>-</sup>  
123 CD19<sup>+</sup>) (Figure 1 – figure supplement 1b-c, e) were sorted from the spleen and their  
124 barcode identity assessed through PCR and deep-sequencing. Note that bone and

125 spleen had similar barcoding profiles (Figure 1 – figure supplement 2). No difference  
126 in chimerism was observed between the EPO and control group in the spleen and  
127 blood, even when mTdT<sub>Tomato</sub>/mGFP donor mice were used to better assess the  
128 erythroid lineage (Figure 1b-c). On average, we detected around eighty barcodes per  
129 mouse, of which most were detected in several lineages (Figure 1d). Comparison of  
130 the numbers of barcodes producing each lineage showed that EPO-exposure resulted  
131 in the same number of engrafting and differentiating cells as in control (Figure 1d).  
132 Notably, the number of erythroid restricted cells remained stable in the EPO group as  
133 compared to control (Figure 1e), indicating that the response to EPO is more complex  
134 than a direct instruction of erythroid-restricted HSPCs.

135 To quantify the effect of EPO on HSPC lineage-biases, barcode-labeled HSPCs were  
136 classified based on the balance of their cellular output in the M, B and E lineages. With  
137 this classification using a 10% threshold, cells classify for example as ME-biased if  
138 they have above 10% of their output in the M and E lineage, and under 10% of their  
139 output in the B lineage (Figure 1e other thresholds in Figure 1 – figure supplement 3b).  
140 Interestingly, application of this classification revealed that although the proportion of  
141 lineage-biased HSPCs in control and EPO group was similar (Figure 1f), their  
142 contribution to the different lineages was increased by EPO-exposure (Figure 1g). In  
143 the control group, balanced HSPCs (MBE) produced the majority of all lineages, as  
144 previously published<sup>46</sup>. In the EPO group, ME- and MB-biased clones produced most  
145 cells of the analyzed lineages (Figure 1g). ME-biased HSPCs produced the majority of  
146 erythroid cells (57% +/- 10%), MB-biased HSPCs produced the majority of B-cells  
147 (58% +/- 36%), and ME- and MB-biased clones contributed the majority of myeloid  
148 cells (MB-biased 45% +/- 38% and ME-biased 20% +/- 13%, together 65% +/- 25%).  
149 To test the significance of this effect, we used a permutation test, which compares the

150 effect size between control and EPO group to the one of all random groupings of  
151 mice<sup>47</sup>. The contributions of the ME- and of the MB-biased HSPC classes to the  
152 different lineages were significantly different in EPO and control groups (Table 1).  
153 These results were reproduced in an additional experiment (Figure 1 – figure  
154 supplement 3c-f, Supplementary File 1). A lower EPO concentration (160 ng/ml) as  
155 well as an additional single injection of EPO (133 ug/kg) during transplantation gave  
156 similar results (Figure 2, Figure 2 – figure supplement 1a, Table 1). Also at six weeks  
157 post transplantation, similar results were obtained (Figure 1 – figure supplement 4,  
158 Supplementary File 1). In summary, *ex vivo* EPO priming of HSPCs modified the output  
159 balance of HSPCs rather than the number of lineage-restricted and -biased cells.  
160 Balanced clones produced a smaller percentage of the mature cells; ME-biased  
161 HSPCs produced most of the erythroid cells and MB-biased HSPCs produced most of  
162 the B cells.

163

164 **Contribution of ME- and MB-biased HSPCs to the DC and MkP lineage.** To further  
165 characterize the cells produced by the ME-biased and MB-biased HSPCs, we repeated  
166 our experimental setup including the analysis of the megakaryocyte and dendritic cell  
167 (DC) lineages (Figure 3). Megakaryocyte Progenitors (MkP) were chosen as proxy for  
168 the production of platelets which are not suitable for barcode analysis. Barcoded  
169 (GFP<sup>+</sup>) DCs (DC; Donor Ter119<sup>-</sup> CD19<sup>-</sup> CD11c<sup>+</sup> CD11b<sup>-</sup>) and MkP (MkP; C-Kit<sup>+</sup> Sca-1<sup>-</sup>  
170 CD150<sup>+</sup> CD41<sup>+</sup>) (Figure 1 – figure supplement 1c-e) were sorted together with M, E,  
171 and B cells, 4 weeks after transplantation of control or EPO-exposed HSPCs (1,000  
172 ng/ml). In both groups, the majority of clones produced also DCs (Figure 3a). In the  
173 control group, balanced HSPCs produced the majority of DCs (65% +/- 9%) (Figure  
174 3b). However, in the EPO group, balanced HSPCs decreased their contribution to the

175 DC lineage (36% +/-25%) and MB-biased HSPCs significantly increased their  
176 contribution (86% +/- 43% EPO vs 22% +/- 11% control group) (Figure 3b, Table 1),  
177 thus, they were MBDC-biased HSPCs. In contrast the ME-biased HSPCs produced  
178 few DCs in both groups (Figure 3b), indicating that ME-biased HSPCs are restricted  
179 both in their B and DC production compared to the M and E production.

180 The majority of the MkP production came from the ME-biased HSPCs in both groups  
181 (58% +/- 21% control and 55% +/- 14% EPO group, Figure 3c-d), indicating that ME-  
182 biased HSPCs were also MkP-biased HSPCs (thus MEK-biased). We did not detect a  
183 high contribution of MkP-restricted HSPCs<sup>25,24,48</sup> to the MkP lineage (Figure 3d).  
184 Finally, as high EPO-exposure has been linked to changes in macrophage numbers<sup>49-</sup>  
185 <sup>56</sup> we analyzed the contribution of control and EPO-exposed HSPCs to the myeloid  
186 lineage in more detail, but could not detect changes in the percentage of the different  
187 myeloid subsets produced (Figure 3 – figure supplement 1a-c).

188

189 **Effect of EPO on short-term HSPC self-renewal.** In light of previous studies which  
190 suggested changes in HSPC proliferation after *in vivo* EPO-exposure<sup>5,12,8,9,11</sup>, we next  
191 explored if the short-term self-renewal capacity of HSPCs was impacted. To this end,  
192 we analyzed barcodes in bone marrow HSPCs in addition to the spleen E, M, and B  
193 lineages at week 4 after transplantation of control or EPO-exposed HSPCs (160 and  
194 1,000 ng/ml) (Figure 4). We reasoned that barcodes of HSPCs differentiating and  
195 short-term self-renewing (dividing to give rise to other HSPCs) after transplantation are  
196 detected in both compartments, while detection in only HSPCs or mature lineages  
197 indicates a prevalence of short-term self-renewal or differentiation respectively. Most  
198 of the barcodes detected in HSPCs overlapped with barcodes in the mature cells  
199 (Figure 4b left) in both the control and two EPO groups, showing that most of the



200 transplanted cells had given rise to other HSPCs and differentiated irrespective of the  
201 treatment. Some barcodes were only detected in mature cells (Figure 4b right),  
202 indicating that some HSPCs had only differentiated or were below the limit of detection.  
203 These HSPCs were equally abundant in the control and two EPO groups (Figure 4b  
204 right).

205 To analyze if different lineage biases correlated to different short-term self-renewal  
206 capacity, we analyzed the proportion of biased HSPC classes, as previously defined,  
207 within the HSPC compartment (Figure 4c). In the control group, balanced and ME-  
208 biased HSPCs contributed most to the HSPC reads (34% +/- 36% MBE and 37% +/-  
209 34% ME-biased HSPCs), while barcodes of MB-biased HSPCs contributed less (15%  
210 +/- 32%) (Figure 4c), a trend that has been previously described<sup>57,58,25</sup>. Surprisingly,  
211 the pattern of contributions of different biased HSPC subsets to HSPC reads was  
212 unchanged in the EPO groups (Figure 4c), implying that the extent of short-term self-  
213 renewal was unchanged after *ex vivo* EPO-exposure.

214 To study if the increased production of cells by the ME- and MB-biased HSPCs to the  
215 mature cells observed after *ex vivo* EPO-exposure (Figure 1-3) correlated with short-  
216 term self-renewal capacity of HSPCs, we analyzed the contribution of barcodes  
217 detected or not in HSPCs to the E, M, and B lineages (Figure 4d). In the control group,  
218 the majority of mature cells were derived from barcodes also present in HSPCs.  
219 However, in both EPO groups, the contribution of barcodes detected in HSPCs to  
220 mature cells was significantly lower (Figure 4d, Table 1) implying that the increased  
221 contribution of biased HSPC classes to the mature cell lineages after *ex vivo* EPO-  
222 exposure was most likely caused by cells differentiating more than short-term self-  
223 renewing.

224

225 **EPO-exposure induces an erythroid program in a subgroup of HSPCs.** To further  
226 characterize the effect of EPO-exposure on HSPCs, we performed scRNAseq of  
227 barcoded C-Kit<sup>+</sup> Sca1<sup>+</sup> Flt3<sup>-</sup> CD150<sup>+</sup> cells after *ex vivo* culture in medium supplemented  
228 with EPO or PBS using the 10X Genomics Chromium platform. 1,706 cells from control  
229 and 1,595 cells from the EPO group passed our quality control. To compare the HSPCs  
230 injected with non-cultured hematopoietic cells, we generated a reference map of  
231 44,802 C-kit<sup>+</sup> cells from<sup>42</sup> and used published signatures as detailed in the  
232 supplementary materials and methods<sup>31,43</sup> to annotate this map (Figure 5 – figure  
233 supplement 1a,b and e,f). Projection of our single cell data on this map showed that  
234 both the control and the EPO-exposed HSPCs similarly overlapped with non-MPP4  
235 LSK cells, according to their sorting phenotype (Figure 5 – figure supplement 1e,f).  
236 These results indicate that neither the *ex vivo* culture itself nor the EPO treatment  
237 dramatically affected the global identity of the sorted HSPCs.  
238 When comparing the EPO and control group, we found 1,176 differentially expressed  
239 genes (Figure 5a and Supplementary File 2) and this number was significantly higher  
240 than the number expected due to chance (p-value=0,01) as assessed by permutation  
241 testing. Among the most upregulated genes in the EPO-exposed HSPCs, were genes  
242 with erythroid association as *Hbb-bs*, *Erdr1*, *Wtap*, *Kmt2d*, or *Nfia*<sup>59</sup>, and GATA1  
243 targets (*Abhd2*, *Cbx3*, *Kdelr2*, *Pfas*), cell cycle related genes (*Tubb5*, *Hist1h2ap*) as  
244 well as genes previously described to be induced in HSPCs after *in vivo* EPO-  
245 exposure, such as *Bmp2k*<sup>6</sup> and *Ifitm1*<sup>8</sup> (Figure 5a). Genes involved in stem cell  
246 maintenance, such as *Serpina3g*, *Mecom*, *Txnip*, *Meis1*, *Pdzk1ip1*<sup>8</sup>, *Sqstm1*<sup>60</sup>,  
247 *Smad7*<sup>61</sup>, *Aes*<sup>62</sup>, were among the most downregulated genes in the EPO-exposed  
248 HSPCs (Figure 5a).

249 As our cellular barcoding data suggests that single HSPCs differ in their response to  
250 EPO, we assessed the heterogeneity of EPO responses at the transcriptomic level.  
251 UMAP-based visualization of the data suggested that a subgroup of EPO-exposed  
252 cells was transcriptomically distinct (Figure 5b), independently of the number of PCA  
253 components and genes used in the analysis (Figure 5 – figure supplement 1c). To test  
254 this observation, we defined an EPO response signature based on differentially  
255 expressed genes between the EPO and control group. Plotting the expression of the  
256 EPO response signature at the single cell level showed that the majority of the  
257 transcriptomic differences between the control and EPO group were indeed driven by  
258 this small subgroup of cells (Figure 5c). Reasoning that this subgroup contains the  
259 cells directly responding to EPO, we defined as EPO-responders, cells in the 90<sup>th</sup>  
260 percentile of EPO response signature expression (Figure 5c) for subsequent analysis.  
261 Importantly, unsupervised clustering analysis of the data (Figure 5 – figure supplement  
262 2a-b) showed similar results. The genes encoding EPOR, as well as the alternative  
263 EPO receptors EphB4, CD131, CRFL3 were equally expressed between the EPO-  
264 responders, non-responders and control groups (Figure 5 – figure supplement 1d).  
265 Reasoning that the EPO-responders correspond to MEK-biased HSPCs, we also  
266 looked for potential MBDC-biased HSPCs but could not detect a subgroup of cells with  
267 upregulation of lymphoid associated genes, suggesting that the MBDC-bias is not a  
268 direct effect of EPO-exposure but more an indirect effect. In summary, the scRNAseq  
269 analysis corroborated our functional barcoding data, showing that a subset of HSPCs  
270 can respond directly to EPO stimulation.

271

272 **EPO-responder HSPCs overlap with MPP1 and MPP2 signatures.** As our barcode  
273 analysis suggested that the effect of direct EPO-exposure on HSPCs is caused by cells

274 differentiating more than self-renewing, we next wanted to assess which of the HSPC  
275 subsets are the EPO responders in our scRNAseq dataset. We annotated the UMAP-  
276 based visualization of our data with published signatures of the HSC (dormant HSCs<sup>40</sup>  
277 and LT-HSC<sup>41</sup>), MPP1<sup>40</sup> and MPP2<sup>31</sup> subsets included in our HSPC gate, and  
278 analyzed its overlap with the previously defined EPO-responder and non-responder  
279 cells (Figure 6a,b). Relative to the control group and non-responders of the EPO-  
280 group, the EPO-responders had a reduced expression of HSC gene signatures and  
281 increased expression of MPP1 and MPP2 signatures (Figure 6a,b). An annotation of  
282 the reference map generated from data of<sup>42</sup> likewise showed a low overlap of EPO-  
283 responders with the most quiescent HSC subsets (Figure 6c,d). The independent  
284 analysis using unsupervised clustering further supported this result (figure 5 – figure  
285 supplement 2c,d). All in all, our scRNAseq analysis implied that, in line with our  
286 barcoding results, the HSPCs directly reacting to EPO are most likely multipotent  
287 progenitor cells of the MPP1 and MPP2 subsets.

288

### 289 **EPO-exposure induces ME-biases in single MPP2.**

290 To confirm that MPP2 are a subset within HSPCs reacting directly to EPO as predicted  
291 by the scRNAseq analysis, we transplanted barcoded control or EPO-exposed (1,000  
292 ng/ml) MPP2 together with unbarcoded CD48<sup>-</sup> HSPCS (C-Kit<sup>+</sup> Sca1<sup>+</sup> Flt3<sup>-</sup> CD150<sup>+</sup>  
293 CD48<sup>-</sup>), (Figure 7 – figure supplement 1a) and analyzed their barcoded progeny in the  
294 E, M, and B lineages of the spleen at week 4 after transplantation (Figure 7). We found  
295 an equivalent engraftment as for the entire HSPC compartment and no difference  
296 between the EPO-treated and the control group (Figure 7a-b). Applying the same  
297 classification as in Figure 1 to quantify the effect of EPO on MPP2 lineage-biases, we  
298 observed that, as for the whole HSPC compartment, ME-biased cells contributed more

299 to the M and E lineages (Figure 7d-e, other threshold in Figure 7 – figure supplement  
300 1c). Similarly to our data on whole HSPC compartment (Figure 1g) the proportion of  
301 the differently biased-MPP2 was similar between control and EPO group (Figure 7c).  
302 This data confirms that the MPP2 population is enriched in HSPCs responding to EPO.  
303

#### 304 **Transient effect of EPO-exposure.**

305 Finally, we reasoned that if EPO directly acts on multipotent progenitors MPP1/2 with  
306 short reconstitution capacity after transplantation rather than long-term repopulating  
307 HSC, then the EPO effect should be transient. To test this hypothesis, we repeated the  
308 experiment and analyzed barcodes in the E, M, and B lineages at 4 months after  
309 transplantation of control or EPO-exposed HSPCs (160 and 1,000 ng/ml) (Fig. 8). In  
310 the control group, as reported before<sup>63</sup>, the chimerism at 4 months was higher and the  
311 number of barcodes detected was lower than at one month post-transplantation (Fig.  
312 8c-d and 1b-d). We detected no significant changes in the clonal output of HSPCs  
313 between control and EPO group at this timepoint (Fig. 8e), with the majority of cells in  
314 all lineages produced by balanced HSPCs (Fig. 8a-b), implying that the effect of direct  
315 EPO-exposure on HSPCs is transient. This confirms that the effect of direct EPO-  
316 exposure on HSPCs is likely caused by multipotent progenitor cells with a short  
317 reconstitution capacity after transplantation.

318

#### 319 **Discussion**

320 EPO is a key regulator of hematopoiesis, and is classically considered to support the  
321 proliferation and survival of erythroid committed progenitors. By analyzing the *in vivo*  
322 fate of hundreds of EPO-stimulated vs untreated transplanted (c-Kit<sup>+</sup> Sca1<sup>+</sup> Flt3-  
323 CD150<sup>+</sup>) HSPCs at the single-cell level, we established that EPO can change HSPC

324 differentiation in the absence of an EPO-stimulated bone marrow microenvironment.  
325 Collectively our results yield 2 important conclusions: (i) EPO has a direct effect on  
326 HSPCs, that is not solely due to the effects of EPO on the surrounding niche and (ii)  
327 EPO directly remodels the clonal composition of HSPC by inducing fate biased MPP  
328 and reducing the output of HSC.

329  
330 Specifically, we observe that EPO induced MEK-biased (ME) and MBDC-biased (MB)  
331 HSPCs that produced the majority (>60%) of mature hematopoietic cells at four and  
332 six weeks after transplantation. In contrast, balanced HSPCs (MBE) had a reduced  
333 output of mature cells in response to EPO. The increased erythroid-associated gene  
334 signature in a subset of HSPCs after *ex vivo* EPO-exposure suggests that EPO directly  
335 induces high output MEK-biased HSPCs, which is indirectly compensated for by the  
336 occurrence of high-output of MBDC-biased HSPCs to maintain a balanced production  
337 of hematopoietic cells.

338 These biased clones had a higher propensity to differentiate than to self-renew, and  
339 their response to EPO was transient, suggesting that EPO-responsive cells are multi-  
340 potent progenitors, and not LT-HSCs. This is supported by transcriptomic analysis  
341 showing that EPO-responders express the MPP1/MPP2 gene-signatures.  
342 Transplantation of barcoded EPO-exposed MPP2 confirmed their enrichment in ME-  
343 biased clones in response to EPO.

344 Similar to studies that assessed the effect of high systemic EPO-exposure <sup>10,9,11,8</sup>, we  
345 found that multipotent progenitors, not HSC, are responding to EPO. The occurrence  
346 of myeloid, megakaryocytic and erythroid gene expression in MPP1 after bleeding <sup>9</sup> is  
347 in line with our findings. Previously, long-term EPO exposure in Tg6 transgenic mice  
348 did however not change the *in vitro* differentiation outcome of MPP2 <sup>11</sup>. Furthermore,

349 we did not detect a fate deviation toward erythroid production at the expense of myeloid  
350 production as seen for in vivo EPO-exposed HSPCs after transplantation<sup>7</sup>. These  
351 differences could be due both to the duration and route of EPO exposure as well as  
352 the indirect effects of systemic EPO-exposure through other cells, for example from  
353 the bone marrow niche.

354 In addition, our data shows that direct cytokine-stimulation leads to a clonal remodeling  
355 of the HSPC compartment, with a transient increase in the contribution of fate-biased  
356 MPPs. Without longitudinal barcoding data within the same animal, we cannot  
357 distinguish if EPO is transiently changing the fate and outcome of the same HSPCs  
358 over time or if EPO is pushing the differentiation of some HSPCs that will be replaced  
359 by more balanced and stable HSPCs.

360 Different studies have suggested that the behavior of transplanted HSPC differ from  
361 native HSPC<sup>64,65</sup>. Transplantation seems to favor the long-term output from HSC  
362 whereas steady state hematopoiesis is maintained more by MPPs contribute than LT-  
363 HSC<sup>64,65,66</sup>. Our work is in line with a model in which MPP are a highly malleable cell  
364 population that can rapidly respond to changing demands for new cells, such as  
365 transplantation or infection<sup>31</sup>.

366 The direct effect of EPO on MPPs we described here could be one of the factors  
367 underlying the development of adverse side effects and co-morbidities during long-  
368 term EPO use in the clinics and associations of high EPO levels with leukemias<sup>67,13,68</sup>.  
369 To translate these results to the clinics and understand the side effect of EPO  
370 treatment, further work is required to determine if HSPCs and erythroid progenitors like  
371 CFU-E are responding to the same dose and duration of EPO exposure.

## 372 **Materials and Methods**

|                            |
|----------------------------|
| <b>Key Resources Table</b> |
|----------------------------|

| Reagent type (species) or resource                    | Designation                                                  | Source or reference     | Identifiers                                                                                                               | Additional information                        |
|-------------------------------------------------------|--------------------------------------------------------------|-------------------------|---------------------------------------------------------------------------------------------------------------------------|-----------------------------------------------|
| Strain, strain background ( <i>Mus musculus</i> )     | C57BL/6J CD45.1 <sup>+</sup> ,                               | Jackson Laboratory      | B6.SJL- <i>Ptprc</i> <sup>a</sup><br><i>Pepc</i> <sup>b</sup> /BoyJ, stock No 002014, B6 Cd45.1                           | male                                          |
| Strain, strain background ( <i>Mus musculus</i> )     | C57BL/6J CD45.2 <sup>+</sup> ,                               | Jackson Laboratory      | C57BL/6J, stock No 000664, B6                                                                                             | male                                          |
| Strain, strain background ( <i>Mus musculus</i> )     | <i>Rosa26CreER</i> <sup>T2</sup> ;mT/mG                      | Jackson Laboratory      | STOCK <i>Gt(ROSA)26Sor</i> <sup>f</sup><br><i>m4(ACTB-tdTomato,-EGFP)</i> <sup>Luo</sup> /J, stock No 007576, mT/mG, mTmG | male                                          |
| Strain, strain background ( <i>Escherichia coli</i> ) | ElectroMAX <sup>TM</sup> Stbl4 <sup>TM</sup> Competent Cells | ThermoFisher Scientific | Cat# 11635018                                                                                                             |                                               |
| Recombinant DNA reagent                               | pRRL-CMV-GFP plasmid <sup>32</sup>                           | PMID 9765382            |                                                                                                                           | Ton Schumacher lab, NKI, Amsterdam            |
| Cell line ( <i>human</i> )                            | HEK293T cells                                                | other                   |                                                                                                                           | Philippe Benaroch lab, Institute Curie, Paris |
| Recombinant DNA reagent                               | p8.9-QV                                                      | other                   |                                                                                                                           | Philippe Benaroch lab, Institute Curie, Paris |
| Recombinant DNA reagent                               | pVSVG                                                        | other                   |                                                                                                                           | Philippe Benaroch lab, Institute Curie, Paris |



|                                |                             |                       |                                                       |         |
|--------------------------------|-----------------------------|-----------------------|-------------------------------------------------------|---------|
| Chemical compound, drug        | anti-CD117 magnetic beads   | Miltenyi              | Cat# 130-091-224,<br><b>RRID:AB_2753213</b>           |         |
| Chemical compound, drug        | Propidium iodide            | Sigma                 | Cat# 81845                                            |         |
| Chemical compound, drug        | StemSpanMedium SFEM         | STEMCELL Technologies | Cat# 9650                                             |         |
| Chemical compound, drug        | Mouse recombinant SCF       | STEMCELL Technologies | Cat# 78064.2                                          |         |
| Chemical compound, drug        | Eprex, erythropoietin alpha | Janssen               |                                                       |         |
| Chemical compound, drug        | anti-biotinylated beads     | Miltenyi              | Cat# 130090485,<br><b>RRID:AB_244365</b>              |         |
| Antibody (rat, monoclonal)     | anti-Ter119-biotin          | BD Biosciences        | Cat# 553672, clone TER119,<br><b>RRID:AB_394985</b>   | (1:100) |
| Antibody (mouse, monoclonal)   | anti-cd45.1-PE              | BD Biosciences        | Cat# 553776, clone A20,<br><b>RRID:AB_395044</b>      | (1:100) |
| Antibody (rat, monoclonal)     | anti-Ter119-PE-Cy7          | BD Biosciences        | Cat# 557853, clone TER119,<br><b>RRID:AB_396898</b>   | (1:100) |
| Antibody (hamster, monoclonal) | anti-cd11c-APC              | eBioscience           | Cat# 17-0114-82, clone N418,<br><b>RRID:AB_469346</b> | (1:100) |
| Antibody (rat, monoclonal)     | anti-cd19-APC-Cy7           | BD Biosciences        | Cat# 557655, clone ID3,<br><b>RRID:AB_396770</b>      | (1:100) |

|                            |                                      |                   |                                                           |         |
|----------------------------|--------------------------------------|-------------------|-----------------------------------------------------------|---------|
| Antibody (rat, monoclonal) | anti-cd11b-PerCP-Cy5.5               | eBiosciences      | Cat# 45-0112-82, clone M1/70,<br><b>RRID:AB_953558</b>    | (1:100) |
| Antibody (rat, monoclonal) | anti-cd117-APC                       | BioLegend         | Cat# 105812, clone 2B8,<br><b>RRID:AB_313221</b>          | (1:100) |
| Antibody (rat, monoclonal) | anti-cd135-PE                        | eBiosciences      | Cat# 12 135182, clone A2F10,<br><b>RRID:AB_465859</b>     | (100)   |
| Antibody (rat, monoclonal) | anti-cd135-PE-Cy5                    | Life technologies | Cat# 15_1351_82, clone A2F10,<br><b>RRID:AB_494219</b>    | (1:100) |
| Antibody (rat, monoclonal) | anti-Sca1-PacificBlue                | BioLegend         | Cat# 122520, clone D7,<br><b>RRID:AB_2143237</b>          | (1:200) |
| Antibody (rat, monoclonal) | anti-cd150-PE-Cy7 (Mouse-monoclonal) | BioLegend         | Cat# 115914, clone TC15-12F12.2,<br><b>RRID:AB_439797</b> | (1:100) |
| Antibody (rat, monoclonal) | anti-cd44-PE                         | BD Biosciences    | Cat# 553134, clone IM7,<br><b>RRID:AB_394649</b>          | (100)   |
| Antibody (rat, monoclonal) | anti-cd41-BV510                      | BD Biosciences    | Cat# 740136, clone MVVREG30,<br><b>RRID:AB_2739892</b>    | (1:100) |
| Antibody (rat, monoclonal) | anti-Siglec-F-PE-CF594               | BD Biosciences    | Cat# 562757, clone E50-2440,<br><b>RRID:AB_2687994</b>    | (1:200) |
| Antibody (rat, monoclonal) | anti-Ly6g-BV510                      | BioLegend         | Cat# 127633, clone 1A8,<br><b>RRID:AB_2562937</b>         | (1:200) |

|                                |                                        |                |                                                   |                                                                                        |
|--------------------------------|----------------------------------------|----------------|---------------------------------------------------|----------------------------------------------------------------------------------------|
| Antibody (rat, monoclonal)     | anti-cd115-PE                          | BioLegend      | Cat# 135505, clone AFS98, <b>RRID:AB_1937254</b>  | (1:200)                                                                                |
| Antibody (hamster, monoclonal) | anti-cd48-APC-Cy7                      | BD Biosciences | Cat# 561242 clone HM48-1, <b>RRID:AB_10644381</b> | (1:100)                                                                                |
| Chemical compound, drug        | Viagen Direct PCR Lysis Reagent (cell) | Euromedex      | Cat# 301-C                                        |                                                                                        |
| Chemical compound, drug        | Proteinase K Solution RNA grade        | Invitrogen     | Cat# 25530-049                                    |                                                                                        |
| Sequence-based reagent         | top-LIB                                | This paper     | PCR primer                                        | TGCTGCCG<br>TCAACTAG<br>A ACA                                                          |
| Sequence-based reagent         | bot-LIB                                | This paper     | PCR primer                                        | GATCTCGA<br>ATCAGGCG<br>CTTA                                                           |
| Sequence-based reagent         | PCR2-Read1-plate-index-forward         | This paper     | PCR primer                                        | ACACTCTTT<br>CCCTACAC<br>GACGCTCT<br>TCCGATCT<br>NNNNCTAG<br>AACACTCG<br>AGATCAG       |
| Sequence-based reagent         | PCR2-Read2-reverse                     | This paper     | PCR primer                                        | GTGACTGG<br>AGTTCAGA<br>CGTGTGCT<br>CTTCCGAT<br>CGATCTCG<br>AATCAGGC<br>GCTTA          |
| Sequence-based reagent         | PCR3-P5-forward                        | This paper     | PCR primer                                        | AATGATA<br>CGGCGACC<br>ACCGAGAT<br>CTACACTC<br>TTTCCCTA<br>CACGACGC<br>TCTTCCGA<br>TCT |
| Sequence-based reagent         | PCR3-P7-sample-index-reverse           | This paper     | PCR primer                                        | CAAGCAGA<br>AGACGGCA<br>TACGAGAN<br>NNNNNNGT                                           |

|                         |                                                   |                                                                                            |                        |                                                                                                    |
|-------------------------|---------------------------------------------------|--------------------------------------------------------------------------------------------|------------------------|----------------------------------------------------------------------------------------------------|
|                         |                                                   |                                                                                            |                        | GACTGGAG<br>TTCAGA<br>CGTGCTCT<br>TCCGATC                                                          |
| Commercial assay or kit | Agencourt AMPure XP system                        | Beckman Coulter                                                                            | Cat# A63881            |                                                                                                    |
| Commercial assay or kit | Chromium Single Cell 3' Reagent Kits v2 Chemistry | 10X Genomics                                                                               |                        |                                                                                                    |
| Software, algorithm     | R-3.4.0                                           | other                                                                                      |                        | (R Development Core Team (2019) <a href="http://www.R-project.org">http://www.R-project.org</a> )  |
| Software, algorithm     | GraphPad Prism version 8.0 for Mac                | GraphPad                                                                                   | <b>RRID:SCR_002798</b> | GraphPad Software, La Jolla California USA, <a href="http://www.graphpad.com">www.graphpad.com</a> |
| Software, algorithm     | XCALIBR                                           | other                                                                                      |                        | ( <a href="https://github.com/NKI-GCF/xcalibr">https://github.com/NKI-GCF/xcalibr</a> )            |
| Software, algorithm     | Cellranger v3                                     | 10X Genomics                                                                               | <b>RRID:SCR_017344</b> |                                                                                                    |
| Software, algorithm     | Seurat v3                                         | <a href="https://doi.org/10.1016/j.cell.2019.05.031">DOI</a><br>10.1016/j.cell.2019.05.031 | <b>RRID:SCR_007322</b> |                                                                                                    |

373

374 **Mice**

375 Male C57BL/6J CD45.1<sup>+</sup>, C57BL/6J CD45.2<sup>+</sup>, and *Rosa26CreER<sup>T2</sup>;mT/mG* mice from  
 376 Jackson Laboratory or bred at Institute Curie aged between 7-13 weeks were used in  
 377 all experiments. All procedures were approved by the responsible national ethics  
 378 committee (APAFIS#10955-201708171446318 v1).

379

## 380 **Barcode library, barcode reference list and lentivirus production**

381 The LG2.2 barcode library is composed of a DNA stretch of 180 bp with a 20 bp “N”-  
382 stretch. DsDNA was generated by 10 PCR rounds and cloned into the XhoI-EcoRI site  
383 of the lentiviral pRRL-CMV-GFP plasmid<sup>32</sup>. Subsequently ElectroMaxStbl4 cells were  
384 transformed, and >10,000 colonies picked for amplification by Maxiprep. To create the  
385 barcode reference list (<https://github.com/PerieTeam/Eisele-et-al.->), barcode plasmids  
386 were PCR amplified twice in duplicate and sequenced as described below. Sequencing  
387 results were filtered for barcode reference list generation as previously described in<sup>33</sup>.  
388 Lentiviruses were produced by transfecting the barcode plasmids and p8.9-QV and  
389 pVSVG into HEK293T cells in DMEM-Glutamax (Gibco) supplemented with 10% FCS  
390 (Eurobio), 1% MEM NEAA (Sigma), and 1% sodium pyruvate (Gibco) using  
391 Polyethyleneimine (Polysciences). Supernatant was 0,45 um filtered, concentrated by  
392 1,5 h ultracentrifugation at 31,000g and frozen at -80°C. HEK293T were tested for  
393 mycoplasma contamination every 6 months.

394

## 395 **HSPC and MPP2 isolation, barcoding, EPO treatment, and transplantation**

396 Isolation and labeling of cells with the barcoding library was performed as described  
397 in<sup>33</sup>. Briefly, after isofluorane anaesthesia and cervical dislocation, bone marrow cells  
398 were isolated from femur, tibia and iliac bones of mice by flushing, and C-Kit<sup>+</sup> cells  
399 were enriched with anti-CD117 magnetic beads on the MACS column system  
400 (Miltenyi). Cells were stained for C-Kit, Flt3, CD150, Sca-1 (Key Resources Table)  
401 Propidium iodide (PI) (Sigma) (1:5,000), and if appropriate CD48. Lineage staining was  
402 not performed after C-Kit<sup>+</sup> MACS enrichment for transplantation cohorts. For HSPC  
403 cohorts, HSPCs (Figure 1 – figure supplement 1a) were sorted and transduced with  
404 the barcode library in StemSpanMedium SFEM (STEMCELL Technologies) with 50

405 ng/ml mSCF (STEMCELL Technologies) through 1,5 h of centrifugation at 300 g and  
406 4,5 h incubation at 37°C to obtain 10% barcoded cells. After transduction, cells were  
407 incubated with human recombinant EPO (Eprex, erythropoietin alpha, Janssen) at a  
408 final concentration of 1,000 or 160 ng/ml or PBS for 16 h at 37°C. After the incubation,  
409 the cells were transplanted by tail vein injection in recipient mice 6 Gy sub-lethally  
410 irradiated 3 hours before on a CIXD irradiator. Mice were allocated to groups of 4-5  
411 mice for each condition randomly without masking. When indicated, cells were injected  
412 together with additional EPO (133 ug/kg). On average 2,600 cells (Mean 2,684 cells  
413 +/- 175 cells) were injected in the tail vein of each mouse. For the MPP2 cohort, MPP2  
414 and CD48<sup>-</sup> HSPCs (Figure 7 – figure supplement 1a) were sorted. Both populations  
415 were cultured alike, but only MPP2 were transduced with the barcode library and  
416 treated with 1,000 ng/ml recombinant EPO as described above. After the culture,  
417 barcoded MPP2 and un-barcoded CD48<sup>-</sup> HSPCs were mixed at a ratio of 32/45 (to be  
418 as close as possible to the original ratio of both populations in the HSPCs) and  
419 transplanted as described above. A FACSAria™ (BD Biosciences) was used for  
420 sorting. FACSDiva™ software (BD Biosciences) was used for measurements and  
421 FlowJo™ v.10 (TreeStar) for analysis.

#### 422 **Cell progeny isolation for barcode analysis**

423 Spleens were mashed and both blood and spleen cells were separated based on  
424 Ter119 using a biotinylated anti-Ter119 antibody (Key Resources Table) and anti-  
425 biotinylated beads on the MACS column system (Miltenyi). Ter119<sup>+</sup> cells were stained  
426 for Ter119 and CD44<sup>34</sup>. Ter119<sup>-</sup> cells were stained for CD45.1 CD11b, CD11c, CD19,  
427 and if appropriate CD115, Siglec-F, and Ly6G (Key Resources Table). Bone marrow  
428 cells were flushed from bones and enriched for C-Kit<sup>+</sup> cells as above. When  
429 appropriate the C-Kit<sup>+</sup> fraction was further separated based on Ter119 and stained as

430 above. C-Kit<sup>+</sup> cells were stained for C-Kit, Flt3, CD150, Sca-1, and if appropriate CD41  
431 (Key Resources Table), and PI (1:5000) as described above. For analyzed and/or  
432 sorted populations see Figure 1 – figure supplement 1. Populations were only sorted  
433 for mice with an engraftment (donor cells percentage) of above 5% in spleen, bone  
434 and blood.

435

### 436 **Lysis, barcode amplification and sequencing**

437 Sorted cells were lysed in 40 µl Viagen Direct PCR Lysis Reagent (cell) (Euromedex)  
438 supplemented with 0,5 mg/ml Proteinase K Solution RNA grade (Invitrogen) at 55°C  
439 for 120 min, 85°C for 30 min, 95°C for 5 min. Samples were then split into two  
440 replicates, and a three-step nested PCR was performed to amplify barcodes and  
441 prepare for sequencing. The first step amplifies barcodes (top-LIB  
442 (5'TGCTGCCGTC AACTAGA ACA-3') and bot-LIB (5'GATCTCGAATCAGGCGCTTA-  
443 3')). A second step adds unique 4 bp plate indices as well as Read 1 and 2 Illumina  
444 sequences (PCR2-Read1-plate-index-forward

445 5'ACACTCTTTCCCTACACGACGCTCTTCCGATCTNNNNCTAGAACTCGAGAT

446 CAG3' and PCR2-Read2-reverse

447 5'GTGACTGGAGTTCAGACGTGTGCTCTTCCGAT

448 CGATCTCGAATCAGGCGCTTA3'). In a third step, P5 and P7 flow cell attachment

449 sequences and one of 96 sample indices of 7 bp are added (PCR3-P5-forward

450 5'AATGATA

451 CGGCGACCACCGAGATCTACACTCTTTCCCTACACGACGCTCTTCCGATCT3'

452 and PCR7-P7-sample-index-reverse

453 5'CAAGCAGAAGACGGCATAACGAGANNNNNNNGTGACTGGAGTTCAGA

454 CGTGCTCTTCCGATC3') (PCR program: hot start 5 min 95°C, 15 s at 95°C; 30 s at

455 57.2°C; 30 s at 72°C, 5 min 72°C, 30 (PCR1-2) or 15 cycles (PCR 3)). Both index  
456 sequences (sample and plate) were designed based on<sup>35</sup> such that sequences differed  
457 by at least 2 bp (<https://github.com/PerieTeam/Eisele-et-al.->). To avoid lack of diversity  
458 at the beginning of the reads, at least 4 different plate indices were used for each  
459 sequencing run. Primers were ordered desalted, as high-performance liquid  
460 chromatography (HPLC) purified. During lysis and each PCR, a mock control was  
461 added. The DNA amplification by the three PCRs was monitored by the run on a large  
462 2% Agarose gel. PCR3 products for each sample and replicate were pooled, purified  
463 with the Agencourt AMPure XP system (Beckman Coulter), diluted to 5 nM. and  
464 sequenced on a HiSeq system (Illumina) (SR-65bp) at Institute Curie facility with 10%  
465 of PhiX spike-in.

466

#### 467 **Barcode sequence analysis**

468 Sequencing results were filtered, and barcodes were categorized in progenitor classes  
469 as in<sup>33</sup> and further explained on github (<https://github.com/PerieTeam/Eisele-et-al.->).  
470 In brief, sequencing results were analyzed using R-3.4.0 (R Development Core Team  
471 (2019) <http://www.R-project.org>), Excel, and GraphPad Prism version 8.0 for Mac  
472 (GraphPad Software, La Jolla California USA, [www.graphpad.com](http://www.graphpad.com)). Reads were first  
473 filtered for perfect match to the input index- and common-sequences using XCALIBR  
474 (<https://github.com/NKI-GCF/xcalibr>) and filtered against the barcode reference list.  
475 Samples were then filtered for containing at least 5000 reads and normalized to 10<sup>5</sup>  
476 per sample. Samples with a Pearson correlation between duplicates below 0.9 were  
477 discarded and barcodes present in one of the two replicates were set to zero. Samples  
478 with under 10 barcodes were filtered out, unless indicated in the figure legend. The  
479 mean of the replicates was used for further processing. When the mean percentage of



480 barcodes shared between different sequencing runs was higher than within the same  
481 sequencing run for mice of a same transduction batch, reads below the read quartile  
482 of the mean percentage of barcodes shared between mice of a same transduction  
483 batch but sequenced on different sequencing runs were set to zero in order to equalize  
484 the barcode sharing between mice transplanted from a same transduction batch in  
485 different sequencing runs to the barcode sharing between mice within each  
486 sequencing run. After filtering, read counts of each barcode in the different cell lineages  
487 were normalized enabling categorization into classes of biased output toward the  
488 analyzed lineages using a threshold of 10% of barcode reads (Other thresholds in  
489 Figure 1 – figure supplement 3c and Figure 7 – figure supplement 1c). Statistics on  
490 barcoding results were performed using a permutation test as in <sup>36</sup>. Significance of flow  
491 cytometry results was assessed using Student's T test. Some mice were excluded from  
492 the analysis due to death before readout, or due to a donor cell engraftment <5%, as  
493 well as the filtering out of mice for which one or more cell subset samples did not pass  
494 the barcode data filtering steps as detailed above.

495

### 496 **ScRNAseq and analysis**

497 ScRNAseq was performed using the 10X Genomics platform on one pool of HSPCs  
498 isolated from 8 mice, barcoded and culture with or without EPO for 16h *in vitro* as  
499 described above. Sequencing libraries were prepared using the Chromium Single Cell  
500 3' v2 kit and sequenced on a HiSeq system (Illumina) at Institut Curie NGS facility.  
501 Data was analyzed using Cellranger v3 (10X Genomics), Seurat v3<sup>37</sup> and customized  
502 scripts. Raw sequencing reads were processed using Cellranger. To obtain a  
503 reads/cell/gene count table, reads were mapped to the mouse GRCm38.84 reference  
504 genome. scRNAseq analysis was performed using Seurat<sup>37</sup>. During filtering, Gm, Rik,

505 and Rp genes were discarded as non-informative genes. Cells with less than 1,000  
506 genes per cell and with a high percentage of mitochondrial genes were removed from  
507 downstream analyses. Following our filtering procedures, the average UMI count per  
508 cell was 5157, with mitochondrial genes accounting for 5% of this. The average  
509 number of genes detected per cell was 2337. Cell cycle annotation using the cyclone  
510 method from the scran R package showed that 2938 cells were in G1 phase, 233 cells  
511 were in G2M phase, and 127 cells were in S phase. No batch effect was detected  
512 between the EPO and no-EPO group, therefore no batch correction was applied. Data  
513 normalization was performed using the default Seurat approach and differentially  
514 expressed genes were determined using a logistic regression in Seurat. Unsupervised  
515 clustering was performed on the significant variable genes using the ten first principle  
516 component analysis followed by the non-linear dimensionality reduction technique  
517 UMAP<sup>38</sup> (Figure 5 – figure supplement 2). Unsupervised Louvain clustering of the data  
518 was performed across a range of resolution parameters and the resolution value that  
519 led to the most stable clustering profiles was chosen<sup>39</sup> (Figure 5 – figure supplement  
520 2). Annotation of the clusters was obtained by mapping published signatures using the  
521 *AddModuleScore* method of Seurat. The signatures are defined in the following  
522 publications: dHSC, and MPP1 signatures were obtained from<sup>40</sup>. The MoIO LT-HSC  
523 signature was taken from<sup>41</sup> and the MPP2 and 4 signature was taken from<sup>31</sup>. An excel  
524 file listing the genes in these signatures is available on github  
525 (<https://github.com/PerieTeam/Eisele-et-al.->). To identify EPO-responder cells in the  
526 EPO group, differential expression analysis was performed between control and EPO  
527 groups (Lists of DEGs are available at <https://github.com/PerieTeam/Eisele-et-al.->).  
528 Subsequently, genes that were differentially expressed (adjusted p-value < 0.05)  
529 between EPO and control groups were transformed into an EPO response signature

530 which when overlaid onto the UMAP based visualization was enriched only in a subset  
531 of the EPO group cells. Briefly this signature was obtained by taking the background  
532 corrected mean expression values of both the up and downregulated genes per cell  
533 as implemented in the *AddModuleScore* method of Seurat. Within each cell these two  
534 signature scores were used to create a composite EPO response score by subtracting  
535 the downregulated response from the upregulated response signature. Cells in the  
536 upper 90<sup>th</sup> percentile with regards to the expression of the EPO response signature  
537 were labelled EPO responders.

538 To perform supervised cell type annotation, a reference map was generated from a  
539 published single cell sequencing dataset of 44,802 C-Kit<sup>+</sup> cells from<sup>42</sup>. Preprocessing  
540 was performed using a scanpy pipeline<sup>43</sup>. Data was then visualized using the non-  
541 linear non-dimensionality reduction technique UMAP<sup>38</sup>. Annotation of the reference  
542 map was obtained by overlaying published signatures as above using the  
543 *AddModuleScore* method of Seurat and also known markers as *Flt3*, *slamf1*, and  
544 *Gata1* (Figure 5 – figure supplement 1b). For the erythroid progenitors these markers  
545 are *Gata1*, *Klf1*, *Epor*, *Gypa*, *Hba-a2*, *Hba-a1* (figure 5 – figure supplement 1a). Cells  
546 were mapped onto the reference map using a k-nearest neighbors mapping approach.  
547 Briefly, for each cell in the query dataset, the nearest neighbors in PCA space of the  
548 reference dataset were determined using the nn2 function of the RANN package and  
549 the mean UMAP 1 and 2 coordinates of the 10 nearest neighbors were taken as the  
550 reference point for the new cell of interest. To benchmark our mapping approach, cells  
551 from an independent dataset of erythroid progenitors<sup>10</sup> were used without additional  
552 pre-processing (Figure 5 – figure supplement 1a).

553

554 **Data sharing statement**

555 Raw data are available at zenodo DOI 10.5281/zenodo.5645045. All codes to filter  
556 and process raw data, as well as filtered data are available at  
557 <https://github.com/PerieTeam/Eisele-et-al.->. Contact author is [leila.perie@curie.fr](mailto:leila.perie@curie.fr).

558

## 559 **Acknowledgements**

560 We thank Dr. T. Schumacher for discussion and lentiviral library production and Dr. K  
561 Duffy for advices on permutation testing. We thank the Institute Curie flow cytometry,  
562 next generation sequencing, and animal facility. We thank Fahima Di Federico from  
563 the UMR168 BMBC facility for amplifying the barcode plasmid pool.

564

## 565 **Disclosure of Conflict of interest**

566 The authors declare no competing interests.

567

## 568 **References**

569

- 570 1. Sender R, Fuchs S, Milo R. Are We Really Vastly Outnumbered? Revisiting the  
571 Ratio of Bacterial to Host Cells in Humans. *Cell*. 2016;164(3):337–40.
- 572 2. Richmond TD, Chohan M, Barber DL. Turning cells red: signal transduction  
573 mediated by erythropoietin. *Trends Cell Biol*. 2005;15(3):146–155.
- 574 3. Walsh G. Biopharmaceutical benchmarks 2014. *Nat. Biotechnol*.  
575 2014;32(10):992–1000.
- 576 4. Koury MJ. Tracking erythroid progenitor cells in times of need and times of  
577 plenty. *Exp. Hematol*. 2016;44(8):653–63.
- 578 5. Cheshier SH, Prohaska SS, Weissman IL. The effect of bleeding on  
579 hematopoietic stem cell cycling and self-renewal. *Stem Cells Dev*.  
580 2007;16(5):707–17.
- 581 6. Shiozawa Y, Jung Y, Ziegler AM, et al. Erythropoietin Couples Hematopoiesis  
582 with Bone Formation. *PLoS One*. 2010;5(5):e10853.
- 583 7. Grover A, Mancini E, Moore S, et al. Erythropoietin guides multipotent  
584 hematopoietic progenitor cells toward an erythroid fate. *J. Exp. Med*.  
585 2014;211(2):181–188.
- 586 8. Giladi A, Paul F, Herzog Y, et al. Single-cell characterization of haematopoietic  
587 progenitors and their trajectories in homeostasis and perturbed  
588 haematopoiesis. *Nat. Cell Biol*. 2018;1.
- 589 9. Yang J, Tanaka Y, Seay M, et al. Single cell transcriptomics reveals  
590 unanticipated features of early hematopoietic precursors. *Nucleic Acids Res*.  
591 2017;45(3):1281–1296.
- 592 10. Tusi BK, Wolock SL, Weinreb C, et al. Population snapshots predict early  
593 haematopoietic and erythroid hierarchies. *Nature*. 2018;555(7694):54–60.

- 594 11. Singh RP, Grinenko T, Ramasz B, et al. Hematopoietic Stem Cells but Not  
595 Multipotent Progenitors Drive Erythropoiesis during Chronic Erythroid Stress in  
596 EPO Transgenic Mice. *Stem Cell Reports*. 2018;10(6):1908–1919.
- 597 12. Dubart A, Feger F, Lacout C, et al. Murine pluripotent hematopoietic  
598 progenitors constitutively expressing a normal erythropoietin receptor  
599 proliferate in response to erythropoietin without preferential erythroid cell  
600 differentiation. *Mol. Cell. Biol.* 1994;14(7):4834–42.
- 601 13. Ma W, Kantarjian H, Zhang K, et al. Significant association between  
602 polymorphism of the erythropoietin gene promoter and myelodysplastic  
603 syndrome. *BMC Med. Genet.* 2010;11(1):163.
- 604 14. Weinreb C, Rodriguez-Fraticelli A, Camargo FD, Klein AM. Lineage tracing on  
605 transcriptional landscapes links state to fate during differentiation. *Science*.  
606 2020;
- 607 15. Li C, Shi C, Kim J, et al. Erythropoietin Promotes Bone Formation through  
608 EphrinB2/EphB4 Signaling. *J. Dent. Res.* 2015;94(3):455–463.
- 609 16. Singbrant S, Russell MR, Jovic T, et al. Erythropoietin couples erythropoiesis,  
610 B-lymphopoiesis, and bone homeostasis within the bone marrow  
611 microenvironment. *Blood*. 2011;117(21):.
- 612 17. Ito T, Hamazaki Y, Takaori-Kondo A, Minato N. Bone Marrow Endothelial Cells  
613 Induce Immature and Mature B Cell Egress in Response to Erythropoietin. *Cell*  
614 *Struct. Funct.* 2017;42(2):149–157.
- 615 18. American Society of Hematology S, Alvarez JC, Noguchi CT. *Blood*. American  
616 Society of Hematology; 2017.
- 617 19. Zhang Y, Wang L, Dey S, et al. Erythropoietin action in stress response, tissue  
618 maintenance and metabolism. *Int. J. Mol. Sci.* 2014;15(6):10296–333.
- 619 20. Tari K, Atashi A, Kaviani S, et al. Erythropoietin induces production of  
620 hepatocyte growth factor from bone marrow mesenchymal stem cells in vitro.  
621 *Biologicals*. 2017;45:15–19.
- 622 21. Dykstra B, Kent D, Bowie M, et al. Long-Term Propagation of Distinct  
623 Hematopoietic Differentiation Programs In Vivo. *Cell Stem Cell*. 2007;1(2):218–  
624 229.
- 625 22. Morita Y, Ema H, Nakauchi H. Heterogeneity and hierarchy within the most  
626 primitive hematopoietic stem cell compartment. *J. Exp. Med.* 2010;
- 627 23. Oguro H, Ding L, Morrison SJ. SLAM family markers resolve functionally  
628 distinct subpopulations of hematopoietic stem cells and multipotent  
629 progenitors. *Cell Stem Cell*. 2013;13(1):102–16.
- 630 24. Sanjuan-Pla A, Macaulay IC, Jensen CT, et al. Platelet-biased stem cells  
631 reside at the apex of the haematopoietic stem-cell hierarchy. *Nature*.  
632 2013;502(7470):232–6.
- 633 25. Carrelha J, Meng Y, Kettle LM, et al. Hierarchically related lineage-restricted  
634 fates of multipotent haematopoietic stem cells. *Nature*. 2018;554(7690):106–  
635 111.
- 636 26. Yamamoto R, Morita Y, Ooehara J, et al. Clonal analysis unveils self-renewing  
637 lineage-restricted progenitors generated directly from hematopoietic stem cells.  
638 *Cell*. 2013;154(5):1112–1126.
- 639 27. Lu R, Neff NF, Quake SR, Weissman IL. Tracking single hematopoietic stem  
640 cells in vivo using high-throughput sequencing in conjunction with viral genetic  
641 barcoding. *Nat. Biotechnol.* 2011;29(10):928–33.
- 642 28. Verovskaya E, Broekhuis MJC, Zwart E, et al. Heterogeneity of young and  
643 aged murine hematopoietic stem cells revealed by quantitative clonal analysis

- 644 using cellular barcoding. *Blood*. 2013;122(4):523–532.
- 645 29. Wilson A, Laurenti E, Oser G, et al. Hematopoietic Stem Cells Reversibly  
646 Switch from Dormancy to Self-Renewal during Homeostasis and Repair. *Cell*.  
647 2008;135(6):1118–1129.
- 648 30. Cabezas-Wallscheid N, Klimmeck D, Hansson J, et al. Identification of  
649 regulatory networks in HSCs and their immediate progeny via integrated  
650 proteome, transcriptome, and DNA methylome analysis. *Cell Stem Cell*.  
651 2014;15(4):507–522.
- 652 31. Pietras EM, Reynaud D, Kang Y-A, et al. Functionally Distinct Subsets of  
653 Lineage-Biased Multipotent Progenitors Control Blood Production in Normal  
654 and Regenerative Conditions. *Cell Stem Cell*. 2015;17(1):35–46.
- 655 32. Dull T, Zufferey R, Kelly M, et al. A Third-Generation Lentivirus Vector with a  
656 Conditional Packaging System. *J. Virol*. 1998;72(11):8463.
- 657 33. Naik SH, Perié L, Swart E, et al. Diverse and heritable lineage imprinting of  
658 early haematopoietic progenitors. *Nature*. 2013;496(7444):229–232.
- 659 34. Chen K, Liu J, Heck S, et al. Resolving the distinct stages in erythroid  
660 differentiation based on dynamic changes in membrane protein expression  
661 during erythropoiesis. *Proc. Natl. Acad. Sci*. 2009;106(41):17413–17418.
- 662 35. Faircloth BC, Glenn TC. Not All Sequence Tags Are Created Equal: Designing  
663 and Validating Sequence Identification Tags Robust to Indels. *PLoS One*.  
664 2012;7(8):e42543.
- 665 36. Tak T, Prevedello G, Simon G, et al. Hspcs display within-family homogeneity  
666 in differentiation and proliferation despite population heterogeneity. *Elife*.  
667 2021;10:.
- 668 37. Satija R, Farrell JA, Gennert D, Schier AF, Regev A. Spatial reconstruction of  
669 single-cell gene expression data. *Nat. Biotechnol*. 2015;33(5):495–502.
- 670 38. McInnes L, Healy J, Saul N, Großberger L. UMAP: Uniform Manifold  
671 Approximation and Projection. *J. Open Source Softw*. 2018;
- 672 39. Blondel VD, Guillaume JL, Lambiotte R, Lefebvre E. Fast unfolding of  
673 communities in large networks. *J. Stat. Mech. Theory Exp*. 2008;
- 674 40. Cabezas-Wallscheid N, Buettner F, Sommerkamp P, et al. Vitamin A-Retinoic  
675 Acid Signaling Regulates Hematopoietic Stem Cell Dormancy. *Cell*. 2017;
- 676 41. Wilson NK, Kent DG, Buettner F, et al. Combined Single-Cell Functional and  
677 Gene Expression Analysis Resolves Heterogeneity within Stem Cell  
678 Populations. *Cell Stem Cell*. 2015;
- 679 42. Dahlin JS, Hamey FK, Pijuan-Sala B, et al. A single-cell hematopoietic  
680 landscape resolves 8 lineage trajectories and defects in Kit mutant mice.  
681 *Blood*. 2018;131(21):e1–e11.
- 682 43. Wolf FA, Hamey FK, Plass M, et al. PAGA: graph abstraction reconciles  
683 clustering with trajectory inference through a topology preserving map of single  
684 cells. *Genome Biol*. 2019;
- 685 44. Matsuoka Y, Sasaki Y, Nakatsuka R, et al. Low level of C-kit expression marks  
686 deeply quiescent murine hematopoietic stem cells. *Stem Cells*.  
687 2011;29(11):1783–1791.
- 688 45. Boyer SW, Rajendiran S, Beaudin AE, et al. Clonal and Quantitative In Vivo  
689 Assessment of Hematopoietic Stem Cell Differentiation Reveals Strong  
690 Erythroid Potential of Multipotent Cells. *Stem Cell Reports*. 2019;12(4):801–  
691 815.
- 692 46. Perié L, Duffy KR, Kok L, de Boer RJ, Schumacher TN. The Branching Point in  
693 Erythro-Myeloid Differentiation. *Cell*. 2015;163(7):1655–62.

- 694 47. Tak T, Prevedello G, Simon G, et al. Simultaneous tracking of division and  
695 differentiation from individual hematopoietic stem and progenitor cells reveals  
696 within-family homogeneity despite population heterogeneity. *bioRxiv*.  
697 2019;586354.
- 698 48. Rodriguez-Fraticelli AE, Wolock SL, Weinreb CS, et al. Clonal analysis of  
699 lineage fate in native haematopoiesis. *Nat. Publ. Gr.* 2018;553:.
- 700 49. Theurl I, Hilgendorf I, Nairz M, et al. On-demand erythrocyte disposal and iron  
701 recycling requires transient macrophages in the liver. *Nat. Med.*  
702 2016;22(8):945–51.
- 703 50. Wang J, Hayashi Y, Yokota A, et al. Expansion of EPOR-negative  
704 macrophages besides erythroblasts by elevated EPOR signaling in  
705 erythrocytosis mouse models. *Haematologica*. 2018;103(1):40–50.
- 706 51. Gilboa D, Haim-Ohana Y, Deshet-Unger N, et al. Erythropoietin enhances  
707 Kupffer cell number and activity in the challenged liver. *Sci. Rep.*  
708 2017;7(1):10379.
- 709 52. Kuzmac S, Grcevic D, Sucur A, Ivcevic S, Katavic V. Acute hematopoietic  
710 stress in mice is followed by enhanced osteoclast maturation in the bone  
711 marrow microenvironment. *Exp. Hematol.* 2014;42(11):966–975.
- 712 53. Ulyanova T, Phelps SR, Papayannopoulou T. The macrophage contribution to  
713 stress erythropoiesis: when less is enough. *Blood*. 2016;128(13):1756–65.
- 714 54. Mausberg AK, Meyer Zu Hörste G, Dehmel T, et al. Erythropoietin ameliorates  
715 rat experimental autoimmune neuritis by inducing transforming growth factor- $\beta$   
716 in macrophages. *PLoS One*. 2011;6(10):e26280.
- 717 55. Liao C, Prabhu KS, Paulson RF. Monocyte derived macrophages expand the  
718 murine stress erythropoietic niche during the recovery from anemia. *Blood*.  
719 2018;blood-2018-06-856831.
- 720 56. Bretz CA, Divoky V, Prchal J, et al. Erythropoietin Signaling Increases  
721 Choroidal Macrophages and Cytokine Expression, and Exacerbates Choroidal  
722 Neovascularization. *Sci. Rep.* 2018;8(1):2161.
- 723 57. Kim S, Kim N, Presson AP, et al. Dynamics of HSPC repopulation in  
724 nonhuman primates revealed by a decade-long clonal-tracking study. *Cell*  
725 *Stem Cell*. 2014;
- 726 58. Aiuti A, Biasco L, Scaramuzza S, et al. Lentiviral hematopoietic stem cell gene  
727 therapy in patients with wiskott-aldrich syndrome. *Science (80-. )*.  
728 2013;341(6148):.
- 729 59. Starnes LM, Sorrentino A, Pelosi E, et al. NFI-A directs the fate of  
730 hematopoietic progenitors to the erythroid or granulocytic lineage and controls  
731  $\beta$ -globin and G-CSF receptor expression. *Blood*. 2009;114(9):1753–1763.
- 732 60. Meenhuis A, Van Veelen PA, De Looper H, et al. MiR-17/20/93/106 promote  
733 hematopoietic cell expansion by targeting sequestosome 1-regulated pathways  
734 in mice. *Blood*. 2011;118(4):916–925.
- 735 61. Blank U, Karlsson G, Moody JL, et al. Smad7 promotes self-renewal of  
736 hematopoietic stem cells. *Blood*. 2006;
- 737 62. Steffen B, Knop M, Bergholz U, et al. AML1/ETO induces self-renewal in  
738 hematopoietic progenitor cells via the Groucho-related amino-terminal AES  
739 protein. *Blood*. 2011;117(16):4328–4337.
- 740 63. Wu C, Espinoza DA, Koelle SJ, et al. Geographic clonal tracking in macaques  
741 provides insights into HSPC migration and differentiation. *J. Exp. Med.*  
742 2018;215(1):217–232.
- 743 64. Sun J, Ramos A, Chapman B, et al. Clonal dynamics of native haematopoiesis.

- 744 *Nature*. 2014;514(7522):.
- 745 65. Busch K, Klapproth K, Barile M, et al. Fundamental properties of unperturbed  
746 haematopoiesis from stem cells in vivo. *Nature*. 2015;518(7540):542–546.
- 747 66. Schoedel KB, Morcos MNF, Zerjatke T, et al. The bulk of the hematopoietic  
748 stem cell population is dispensable for murine steady-state and stress  
749 hematopoiesis. *Blood*. 2016;128(19):2285–2296.
- 750 67. Rainville N, Jachimowicz E, Wojchowski DM. Targeting EPO and EPO receptor  
751 pathways in anemia and dysregulated erythropoiesis. *Expert Opin. Ther.*  
752 *Targets*. 2016;20(3):287–301.
- 753 68. Halawi R, Cappellini MD, Taher A. A higher prevalence of hematologic  
754 malignancies in patients with thalassemia: Background and culprits. *Am. J.*  
755 *Hematol*. 2017;92(5):414–416.
- 756
- 757
- 758



759 **Tables**

760 **Table 1: Permutation testing of changes in clonality after transplantation of EPO-**  
 761 **exposed HSPCs.** Same data as in Figure 1, 2, 3, 4 and Figure 7. HSPCs or MPP2  
 762 were cultured with different concentrations of EPO (160 ng/ml or 1,000 ng/ml) for 16h,  
 763 and when indicated a soluble dose of EPO (133 ug/kg) was injected together with  
 764 barcoded HSPCs at the moment of transplantation. Barcodes in the erythroid (E),  
 765 myeloid (M), B-lymphoid (B) lineage, dendritic cell (DC) and HSPCs, were analyzed  
 766 four weeks after transplantation and categorized by bias using a 10% threshold. For  
 767 the data of Figure 1, 2 and 7, the output of MB and ME classified barcodes to the B,  
 768 M, and E lineages was analyzed using a permutation test. For the data of Figure 3, the  
 769 output of MBE and MB classified barcodes to the DC lineage was analyzed. For the  
 770 data of Figure 4, the output of barcodes present in HSPCs to the B, M, and E lineages  
 771 was analyzed using a permutation test. By permutating the mice of control and EPO  
 772 groups, the random distribution of this output was generated and compared to the real  
 773 output difference between control and EPO group. A p-value was generated as in<sup>47</sup>

| Figure | Condition               | p-value          |                  |                  |         |
|--------|-------------------------|------------------|------------------|------------------|---------|
|        |                         | MB in B          | MB in M          | ME in E          | ME in M |
| 1      | HSPCs 160 ng/ml         | 0.02             | 0.04             | 0.02             | 0.04    |
| 1, 2   | HSPCs 1000 ng/ml        | 0.0075           | 0.0071           | 0.0071           | 0.012   |
| 2      | HSPCs 160 ng/ml + inj.  | 0.01             | 0.016            | 0.012            | 0.011   |
| 2      | HSPCs 1000 ng/ml + inj. | 0.0018           | 0.0018           | 0.002            | 0.0025  |
| 7      | MPP2 1000 ng/ml         | 0.006            | 0.008            | 0.004            | 0.004   |
|        |                         | <b>MBE in DC</b> | <b>MB in DC</b>  |                  |         |
| 3      | HSPCs 1000 ng/ml        | 0.07             | 0.0075           |                  |         |
|        |                         | <b>HSPC in B</b> | <b>HSPC in M</b> | <b>HSPC in E</b> |         |
| 4      | HSPCs 160 ng/ml         | 0.035            | 0.029            | 0.029            |         |
|        | HSPCs 1000 ng/ml        | 0.008            | 0.06             | 0.01             |         |

774

775 **Figure Legends**

776

777 **Figure 1: High output ME- and MB-biased clones occur after EPO-exposure and**

778 **transplantation of HSPCs. a,** HSPCs were sorted from the bone marrow of donor

779 mice, lentivirally barcoded, cultured *ex vivo* with or without 1,000 ng/ml EPO for 16 h

780 and transplanted into sublethally irradiated mice. At week 4 post-transplantation, the

781 erythroid (E), myeloid (M), and B-cells (B) lineages were sorted from the spleen and

782 processed for barcode analysis. **b,** The percentage of donor derived cells (CD45.1<sup>+</sup>)

783 among the total spleen, myeloid cells (CD11b<sup>+</sup>) or B-cells (CD19<sup>+</sup>) in the spleen of

784 control and EPO group. **c,** To better assess chimerism in erythroid cells

785 mTdTomato/mGFP donor mice were used. The fraction of Tom<sup>+</sup> cells among erythroid

786 cells (Ter119<sup>+</sup>) in the spleen and blood in control and EPO group. **d,** Number of

787 barcodes retrieved in the indicated lineages at week 4 after transplantation in control

788 and EPO group. **e,** Triangle plots showing the relative abundance of barcodes (circles)

789 in the E, M, and B lineage with respect to the summed output over the three lineages

790 (size of the circles) for control and EPO group. **f,** Percentage of HSPCs classified by

791 the indicated lineage bias, using a 10% threshold for categorization. **g,** Quantitative

792 contribution of the classes as in f to each lineage. Shown are values from several

793 animals (n= 8 EPO, n= 10 control in b, n= 3 EPO, n=4 control in c spleen, n= 4 EPO,

794 n=8 control in c blood collected over 5 different experiments (d-g) n=5 for control and

795 n=2 for EPO group collected over one experiment). For all bar graphs mean and S.D.

796 between mice are depicted. Statistical significance tested using Mann-Withney U test

797 p=0,05 for (b-c). Statistical significance tested by permutation test for different subsets

798 in g (see Table 1). This Figure has four supplements.

799

800 **Figure 2: Effect of different EPO concentrations on HSPC clonality after**  
801 **transplantation.** Same protocol as in Figure 1 but HSPCs were cultured with different  
802 concentrations of EPO (160 ng/ml or 1,000 ng/ml) for 16 h, and when indicated a single  
803 dose of EPO (133 ug/kg) was injected together with barcoded cells at the moment of  
804 transplantation. **a**, Triangle plots showing the relative abundance of barcodes (circles)  
805 in the erythroid (E), myeloid (M), and B-lymphoid (B) lineage with respect to the  
806 summed output over the three lineages (size of the circles) for the different  
807 experimental groups as indicated. **b**, The percentage of each lineage produced by the  
808 barcodes categorized by bias using a 10% threshold. Shown are values from several  
809 animals (n=2 for 160 ng/ml, 1,000 ng/ml, and 160 ng/ml + EPO injection, n=4 for 1,000  
810 ng/ml + EPO injection (collected over 4 different experiments)). For all bar graphs  
811 mean and S.D. between mice are depicted. Statistical significance tested by  
812 permutation test for different subsets in b (see Table 1). This figure has one  
813 supplement.

814

815 **Figure 3: Production of Dendritic Cells (DC) and Megakaryocyte Progenitors**  
816 **(MkP) by HSPCs after EPO-exposure and transplantation.** In addition to the  
817 analysis of barcodes in the erythroid (E), the myeloid (M), and the B-cell (B) lineage,  
818 the DC lineage in spleen and MkP in bone marrow were added. **a**, Percentage of  
819 barcoded HSPCs producing DC in the different HSPC categories (classification as in  
820 Figure 2 based on the M, E, and B lineage only using a 10% threshold. The DC only  
821 category was added). **b**, The percentage of the DC lineage produced by the barcodes  
822 categorized by bias as in a. **c-d**, Representations as in a-b for barcode detection in  
823 MkP. Data is derived from a cohort with detailed myeloid sorting. The myeloid lineage  
824 was merged according to the percentage of total donor myeloid each subset

825 contributed as in Figure 2 – supplement 1a to allow classification as in a-b based on  
826 the M, E, and B lineage only using a 10% threshold. The MkP only category was added.  
827 Shown are values from several animals (a-b, n=5 for control and n=2 for EPO group,  
828 c-d, n=3 for control and n=1 for EPO group (collected over two experiments)). For all  
829 bar graphs mean and S.D. between mice are depicted. Statistical significance tested  
830 using Mann-Withney U test  $p=0,05$  for (a,c). Statistical significance tested by  
831 permutation test for different subsets in b (see Table 1). This figure has one  
832 supplement.

833

834 **Figure 4: Overlap of barcodes in HSPCs and mature cells after transplantation**  
835 **of EPO-exposed HSPCs.** Same protocol as in Figure 1 but HSPCs were cultured with  
836 two different concentrations of EPO (160 ng/ml or 1000 ng/ml) for 16 h. In addition,  
837 HSPCs were sorted and subjected to barcode analysis. **a**, The total number of  
838 barcodes found back in HSPCs. **b**, The percentage of barcodes in the mature cell  
839 subsets also detected in HSPCs and the percentage of barcodes in HSPCs also  
840 detected in mature cells. **c**, The percentage of the HSPC lineage contributed by  
841 barcodes categorized by bias as in Figure 2 based on the M, E, and B lineage using a  
842 10% threshold. **d**, The percentage of each lineage produced by the barcodes color  
843 coded for presence (blue) and absence (grey) in HSPCs. Shown are values from  
844 several animals (n=5 for control, n=2 for EPO 160 ng/ml group and n=3 for EPO 1,000  
845 ng/ml group). For all bar graphs mean and S.D. between mice are depicted. Statistical  
846 significance tested using Mann-Withney U test  $p=0,05$  for (a-b). Statistical significance  
847 tested by permutation test for different subsets in d (see Table 1).

848

849 **Figure 5: Characterization of EPO-exposed HSPCs by scRNAseq.** HSPCs were  
850 sorted, barcoded and cultured *ex vivo* with or without 1,000 ng/ml EPO for 16 h, and  
851 analysed by scRNAseq using the 10X Genomics platform. 1,706 cells from control and  
852 1,595 cells from EPO group passed quality control **a**, Volcano plot of log<sub>2</sub> fold change  
853 of the differentially expressed genes between control and EPO-exposed cells versus  
854 the adjusted p-value. Genes of interest are annotated. Differentially expressed genes  
855 were used to defined an EPO response signature. **b**, UMAP visualization of the EPO-  
856 exposed and control HSPCs. **c**, The level of expression in the EPO-exposed HSPCs  
857 of the genes in the EPO response signature (top), and definition of the EPO-responder  
858 and non-responder subgroups using the 90th percentile expression of the EPO  
859 response signature from c (bottom). **d**, The expression of the indicated genes in the  
860 control, EPO-responder and non-responder subgroups as defined in c. Genes that are  
861 significantly upregulated in the EPO-responder group, when compared to control and  
862 non-responder groups. Differential expression was assessed using a logistic  
863 regression testing approach, as implemented in Seurat. This figure has two  
864 supplements and correspond to one 10X experiment of a pool of 8 mice.

865

866 **Figure 6: EPO-responders are multipotent progenitors, not HSCs.** Same protocol  
867 as in Figure 5. **a**, Expression of published gene-signatures of HSCs (dormant HSC<sup>40</sup>,  
868 molecular overlap (moIO) HSC signature<sup>41</sup>) and MPPs (MPP1<sup>40</sup>-2<sup>31</sup>) across the entire  
869 dataset (see Methods) **b**, Expression of the signatures from 6a, across control, non-  
870 responder, and EPO-responder groups as defined in Figure 5c. Statistical comparisons  
871 made using a Kruskal Wallis Test with a Dunns multiple comparisons post-hoc test **c**,  
872 Expression of the moIO HSC signature on the published reference map<sup>42</sup>. **d**, Nearest-

873 neighbor mapping of control, EPO-responder and non-responder cells onto the  
874 published reference map<sup>42</sup>.

875

876 **Figure 7: MPP2 are enriched for ME-biased clones after EPO-exposure and**  
877 **transplantation.** MPP2 and CD48<sup>-</sup> HSPCs were sorted from the bone marrow of donor  
878 mice, MPP2 were lentivirally barcoded, and both populations cultured *ex vivo* with or  
879 without 1,000 ng/ml EPO for 16 h. After the culture, barcoded MPP2 and un-barcoded  
880 CD48<sup>-</sup> HSPCs were mixed and transplanted into sublethally irradiated mice. At week  
881 4 post-transplantation, the erythroid (E), myeloid (M), and B-cells (B) lineages were  
882 sorted from the spleen and processed for barcode analysis. **a**, The fraction of donor  
883 cells among the indicated cell types in spleen. **b**, Barcode number retrieved in the  
884 indicated lineage at 4 weeks after transplantation in control and EPO 1,000 ng/ml  
885 group. **c**, Percentage of MPP2s classified using a threshold of 10% in experimental  
886 groups as indicated. **d**, The percentage of each lineage produced by the MPP2  
887 barcodes categorized by bias using a 10% threshold. **e**, Triangle plots showing the  
888 relative abundance of barcodes (circles) in the erythroid (E), myeloid (M), and B-  
889 lymphoid (B) lineage with respect to the summed output over the three lineages (size  
890 of the circles). Shown are data from several mice (n=3 for control and n=4 for EPO  
891 group). For all bar graphs mean and S.D. between mice are depicted. Statistical  
892 significance tested using Mann-Whitney U test p=0,05 for (c-e). Statistical significance  
893 tested by permutation test for different subsets in a (see Table 1). This figure has one  
894 supplement.

895

896 **Figure 8: The effect of EPO on HSPC clonality after transplantation is transient.**  
897 Same protocol as in Figure 1, but barcodes in the E, M, and B lineage in spleen of

898 individual mice sacrificed at month 4 post-transplantation were analyzed. **a**, Triangle  
899 plots showing the relative abundance of barcodes (circles) in the erythroid (E), myeloid  
900 (M), and B-cell (B) lineage with respect to the summed output over the three lineages  
901 (size of the circles) for the different experimental groups as indicated. **b**, The  
902 percentage of each lineage produced by the barcodes categorized by bias using a  
903 10% threshold. **c**, The fraction of donor cells among the indicated cell types in spleen.  
904 **d**, Barcode number retrieved in the indicated lineage at month 4 after transplantation  
905 in control, EPO 160 ng/ml, and EPO 1,000 ng/ml group. **e**, Percentage of HSPCs  
906 classified using a threshold of 10% in experimental groups as indicated. Shown are  
907 data from several mice. (c, n=5 for control and n=4 for each EPO group, (a-b, d-e) n=6  
908 for control and n=4 for each EPO group (collected over two experiments)). For all bar  
909 graphs mean and S.D. between mice are depicted. Statistical significance tested using  
910 Mann-Whitney U test  $p=0,05$  for (c-e).

911

## 912 **Figure supplements legends**

913

914 **Figure 1 – figure supplement 1: Gating strategies and HSPC marker expression**  
915 **after lentiviral transduction and ex vivo culture with or without EPO.** **a**, HSPCs  
916 were gated as propidium iodide negative single C-Kit<sup>+</sup> Sca-1<sup>+</sup> Flt3<sup>-</sup> CD150<sup>+</sup> cells of C-  
917 Kit<sup>+</sup> enriched bone marrow cells. **b**, Erythroblast cells were gated as Ter119<sup>+</sup> CD44<sup>+</sup>  
918 FSC<sup>hi</sup> cells on Ter<sup>+</sup> enriched cells. **c**, Gating strategy for B-cells (CD19<sup>+</sup> CD11b<sup>-</sup>),  
919 dendritic cells (CD19<sup>-</sup> CD11b<sup>-</sup> CD11c<sup>+</sup>), and myeloid cells (CD119<sup>-</sup> CD11c<sup>-</sup> CD11b<sup>+</sup>) on  
920 Ter119<sup>-</sup> live single donor cells. **d**, Gating for MkP (C-Kit<sup>+</sup> Sca-1<sup>-</sup> CD150<sup>+</sup> CD41<sup>+</sup>) from  
921 C-Kit<sup>+</sup> enriched bone marrow cells. **e**, Sort gating for GFP<sup>+</sup> erythroid, myeloid, B-, and  
922 dendritic cells respectively used for barcoding analysis. **f**, Representative flow

923 cytometry plots of sorted HSPC pool after 6 h lentiviral transduction and 16 h *ex vivo*  
924 incubation with or without EPO.

925 **Figure 1 – figure supplement 2: Correlations in barcoding profiles of spleen and**  
926 **bone.** HSPCs were sorted from the bone marrow of donor mice, lentivirally barcoded,  
927 cultured *ex vivo* for 16 h and transplanted into sublethally irradiated mice. At week 4  
928 post-transplantation, erythroid (E), B-cells (B), and the myeloid lineage (M) cells  
929 monocytes, eosinophils, neutrophils, and macrophages were sorted from the spleen  
930 and from bone and processed for barcode analysis. The myeloid lineage was merged  
931 according to the percentage of total donor myeloid each subset contributed as in  
932 Supplementary Figure 4a. **a**, Heatmaps showing the output of individual barcodes  
933 (rows) in different samples (columns) as indicated. Data is normalized by cell subset,  
934 log transformed, and clustered by complete linkage using Euclidean distance. No  
935 output is represented in black. **b**, The percentage of barcodes in spleen and bone  
936 detected in the respective other organ. The spearman rank correlation of barcodes in  
937 bone and spleen was for the B-, M- and E-lineage 0.81, 0,69 and 0,7 respectively.  
938 Shown are values from several animals (n= 3). For all bar graphs mean and S.D.  
939 between mice are depicted. Statistical significance tested using Mann-Withney U test  
940  $p=0,05$  for (b).

941

942 **Figure 1 – figure supplement 3: Characterization of lineage biases after**  
943 **transplantation of EPO-exposed HSPCs.** **a**, Triangle plots from Figure 1e color  
944 coded by mice. **b**, Quantitative contribution of the classes to each lineage as in Figure  
945 1 using different thresholds of 0%, 5%, 10%, 15% and 20%. **c-f**, Data for an additional  
946 experiment as in Figure 1. **c**, Number of barcodes retrieved in the indicated lineages



947 at week 4 after transplantation in control and EPO group. **d**, Triangle plots showing the  
948 relative abundance of barcodes (circles) in the erythroid (E), myeloid (M), and B-cell  
949 (B) lineage with respect to the summed output over the three lineages (size of the  
950 circles) for control and EPO group. **e**, Proportion of HSPCs classified in the indicated  
951 lineage bias category, using a 10% classification threshold. **f**, Quantitative contribution  
952 of the classes as in **f** to each lineage. Shown are values from several animals (a-c, n=5  
953 for control group and n=2 for EPO group (collected over one experiment), d-f, n= 2 for  
954 control, n= 3 for EPO group (collected over one experiment)). For all bar graphs mean  
955 and S.D. between mice are depicted. Statistical significance tested using Mann-  
956 Withney U test  $p=0,05$  for (c, e).

957 **Figure 1 – figure supplement 4: High output ME- and MB-biased HSPCs occur**  
958 **six weeks after transplantation of EPO-exposed HSPCs.** HSPCs were sorted from  
959 the bone marrow of donor mice, lentivirally barcoded, cultured *ex vivo* with or without  
960 1,000 ng/ml EPO for 16 h and transplanted into sublethally irradiated mice. At week 6  
961 post-transplantation, the erythroid (E), myeloid (M), and B-cells (B) lineages were  
962 sorted from the spleen and processed for barcode analysis. Quantitative contribution  
963 of HSPCs classified by the indicated lineage bias, using a 10% threshold for  
964 categorization, to each lineage. Shown are values from several animals (n= 2 EPO, n=  
965 4 control). Mean and S.D. between mice are depicted.

966 **Figure 2 – figure supplement 1: Variability in the effect of different EPO**  
967 **concentrations on clonality after HSPC transplantation at different timepoints. a,**  
968 Triangle plots showing the relative abundance of barcodes (circles) in the erythroid (E),  
969 myeloid (M), and B-cell (B) lineage with respect to the summed output over the three

970 lineages (size of circles) for control and EPO groups of Figure 2, color coded by mice.  
971 **b**, Same representation as in a for data of Figure 8.

972 **Figure 3 – figure supplement 1: Production of macrophages, monocytes,**  
973 **neutrophils, eosinophils, and Megakaryocyte Progenitors (MkP) by HSPCs after**  
974 **EPO-exposure and transplantation.** Same experimental protocol as in Figure 1 but  
975 the myeloid cells were subdivided into monocytes, eosinophils, macrophages and  
976 neutrophils, and MkP were sorted. **a**, Gating for detailed myeloid subsets on myeloid  
977 cells. Monocytes (Mo) were sorted as CD115<sup>+</sup> cells, eosinophils (Eo) as CD115<sup>-</sup>  
978 SiglecF<sup>+</sup> Ly6G<sup>+</sup>, macrophages (Ma) as CD115<sup>-</sup> SiglecF<sup>-</sup> Ly6G<sup>-</sup>, and neutrophils (Neu)  
979 as CD115<sup>-</sup> SiglecF<sup>-</sup> Ly6G<sup>+</sup> cells. **b**, The contribution of different cell types to the overall  
980 donor myeloid subset in control and EPO group. **c**, Heatmaps showing the output of  
981 individual barcodes (rows) in different samples (columns) as indicated. Data is  
982 normalized by cell subset, log transformed, and clustered by complete linkage using  
983 Euclidean distance. No output is represented in black. Shown are values from several  
984 animals (b, n=5 for control and n= 3 for EPO group c, n=3 for control and n=2 for EPO  
985 group (collected over two experiments)). For all bar graphs mean and S.D. between  
986 mice are depicted. Statistical significance tested using Mann-Withney U test p=0,05  
987 for (b).

988

989 **Figure 5 – figure supplement 1: ScRNAseq analysis of control and EPO-exposed**  
990 **HSPCs a**, UMAP projection of the scRNAseq dataset from<sup>42</sup> annotated with *flt3*,  
991 *CD150*, and *gata1* gene expression. **b**, Projecting of erythroid-biased progenitors  
992 from<sup>10</sup> on UMAP projection of a. **c**, Robustness of the UMAP visualization and  
993 unsupervised clustering of the data in Figure 4c .The amount of variance explained by

994 each principle component (left) and UMAP-based visualization using 10 PCA (right)  
995 for different number of genes. **d**, The expression of genes encoding known EPO  
996 receptors in each subgroup. **e**, Overview of the reference map using supervised cell  
997 type annotation of the dataset from<sup>42</sup>. On the right hand side we overlay the MPP4  
998 signature defined by<sup>31</sup> onto our reference map to facilitate celltype annotation **f**, HSPCs  
999 were sorted, barcoded and cultured *ex vivo* with or without 1,000 ng/ml EPO for 16 h,  
1000 and analysed by scRNAseq using the 10X Genomics platform. Mapping of the  
1001 transcriptomes of the 1,706 cells from control and 1,595 cells from EPO group obtained  
1002 after quality control onto the reference map using a k-nearest neighbors mapping  
1003 approach.

1004

1005 **Figure 5 – figure supplement 2: Unsupervised clustering of control and EPO-**  
1006 **exposed HSPCs** **a**, Cluster stability analysis varying the resolution parameter of the  
1007 Seurat clustering method. The significant variable genes using 10 PCA were used as  
1008 input. **b**, UMAP visualization of the data in a using a clustering resolution of 0.1. with  
1009 the proportion of each cluster as in the control, EPO-responder and non-responder  
1010 subgroups. **c**, expression of published signatures of established celltypes used to  
1011 annotate our clusters. All comparisons in signature expression between clusters were  
1012 statistically significant (adjusted p-value < 0.05) as determined by a Kruskal-Wallis  
1013 Test and Dunns Post-Hoc analysis. **d**, Nearest neighbor mapping of unsupervised  
1014 clusters from b onto the reference map.

1015

1016 **Figure 7 – figure supplement 1: Characterization of lineage biases after**  
1017 **transplantation of EPO-exposed MPP2.** **a**, MPP2s and CD48<sup>-</sup> HSPCs were gated as  
1018 propidium iodide negative single C-Kit<sup>+</sup> Sca-1<sup>+</sup> Flt3<sup>-</sup> CD150<sup>+</sup> CD48<sup>+</sup> (MPP2) and CD48<sup>-</sup>

1019 (CD48<sup>-</sup> HSPCs) cells of C-Kit<sup>+</sup> enriched bone marrow cells. **b**, Triangle plots from  
1020 Figure 7b color coded by mice. **c**, Quantitative contribution of the classes to each  
1021 lineage as in Figure 7a using different thresholds of 0%, 5%, 10%, 15% and 20%. (a-  
1022 c, n=5 for control group and n=2 for EPO group (collected over one experiment).  
1023 Shown are values from several animals (n= 3 for control, n= 4 for EPO group (collected  
1024 over one experiment)). For all bar graphs mean and S.D. between mice are depicted.

1025

1026 The article has one Supplementary File 1.

1027

1028 **Supplementary File legends:**

1029

1030 **Supplementary File 1.** Permutation testing of changes in clonality after transplantation  
1031 of EPO-exposed HSPCs. Same data as in Figure 1 figure supplement 4 and Figure 1  
1032 figure supplement 3. HSPCs were cultured with EPO (1,000 ng/ml) for 16h. Barcodes  
1033 in the erythroid (E), myeloid (M), B-lymphoid (B) lineage, dendritic cell (DC) and  
1034 HSPCs, were analyzed four weeks after transplantation and categorized by bias using  
1035 a 10% threshold. The output of MB and ME classified barcodes to the B, M, and E  
1036 lineages was analyzed using a permutation test. By permutating the mice of control  
1037 and EPO groups, the random distribution of this output was generated and compared  
1038 to the real output difference between control and EPO group. A p-value was generated  
1039 by permutation testing.

1040

a

|                                                             |                                         |                                       |                                                 |                                                 |                            |
|-------------------------------------------------------------|-----------------------------------------|---------------------------------------|-------------------------------------------------|-------------------------------------------------|----------------------------|
| 1. Isolate HSPC (LSK CD150 <sup>+</sup> Fit3 <sup>-</sup> ) | 2. Transduce with LG2.2 barcode library | 3. Incubate with EPO for 16h in vitro | 4. Transplant into sub-lethally irradiated mice | 5. Harvest organs and barcoded cells in E, M, B | 6. Sequencing and analysis |
|-------------------------------------------------------------|-----------------------------------------|---------------------------------------|-------------------------------------------------|-------------------------------------------------|----------------------------|

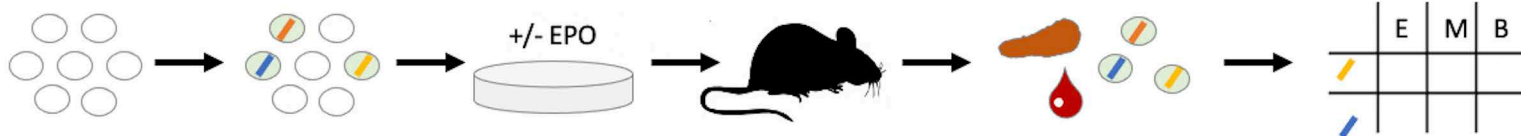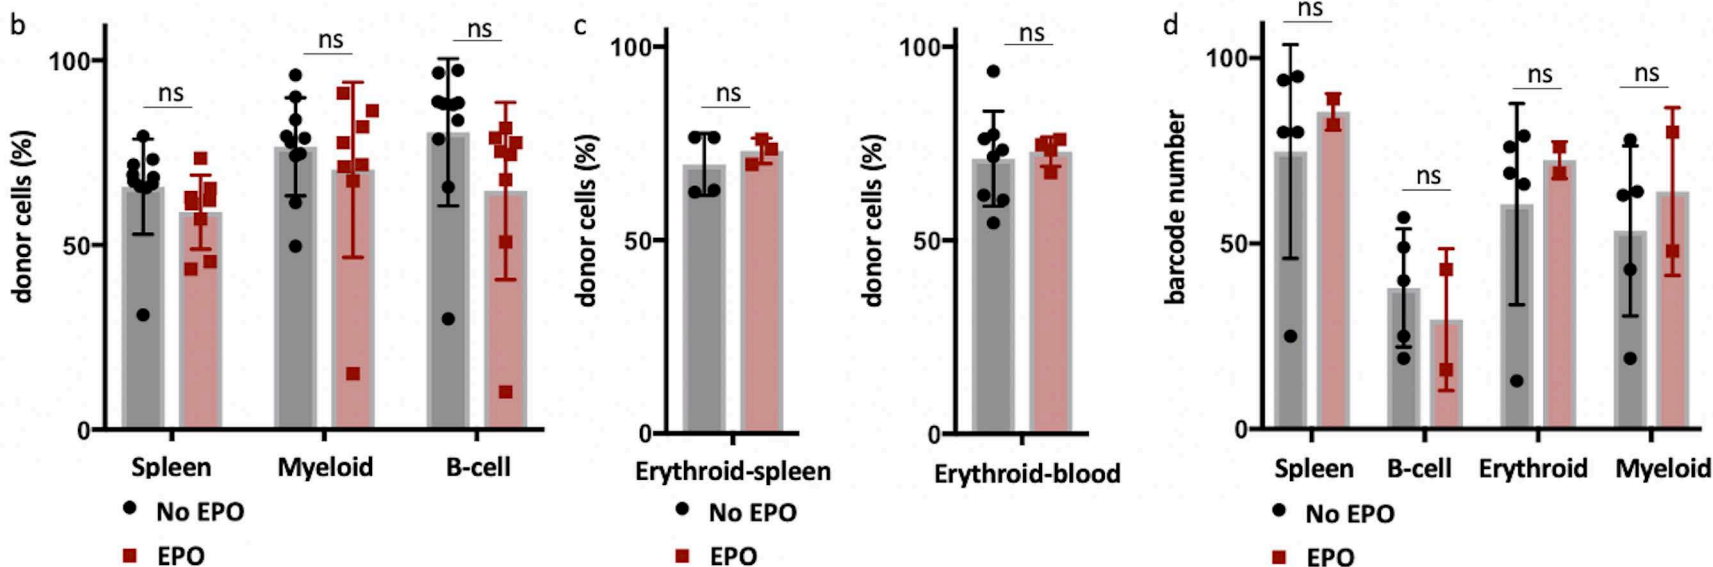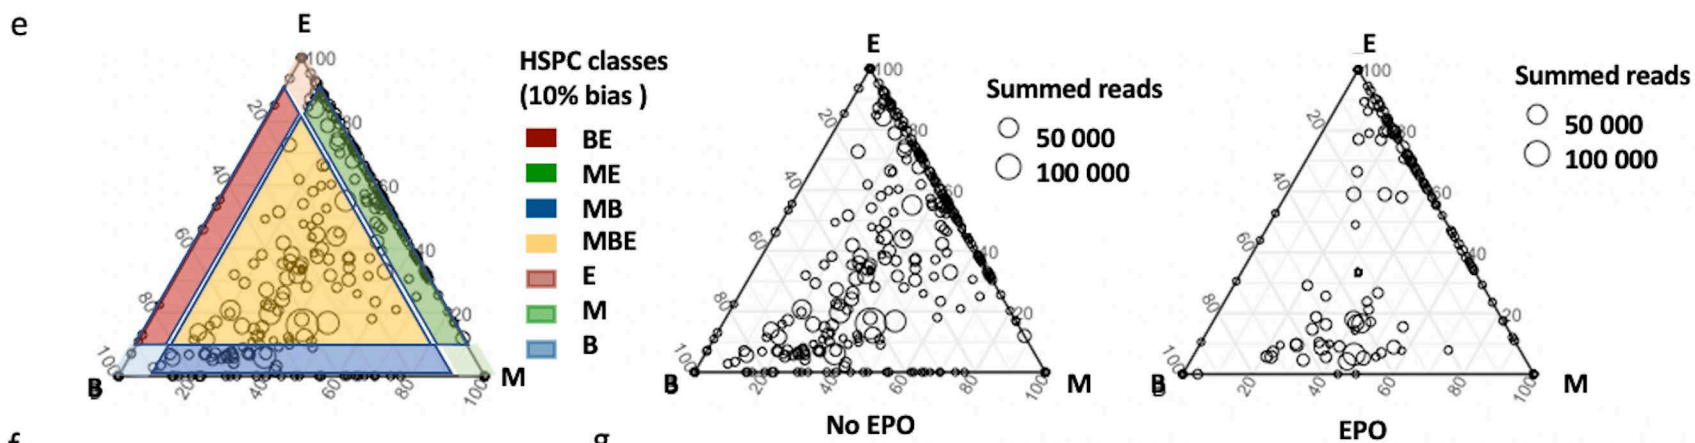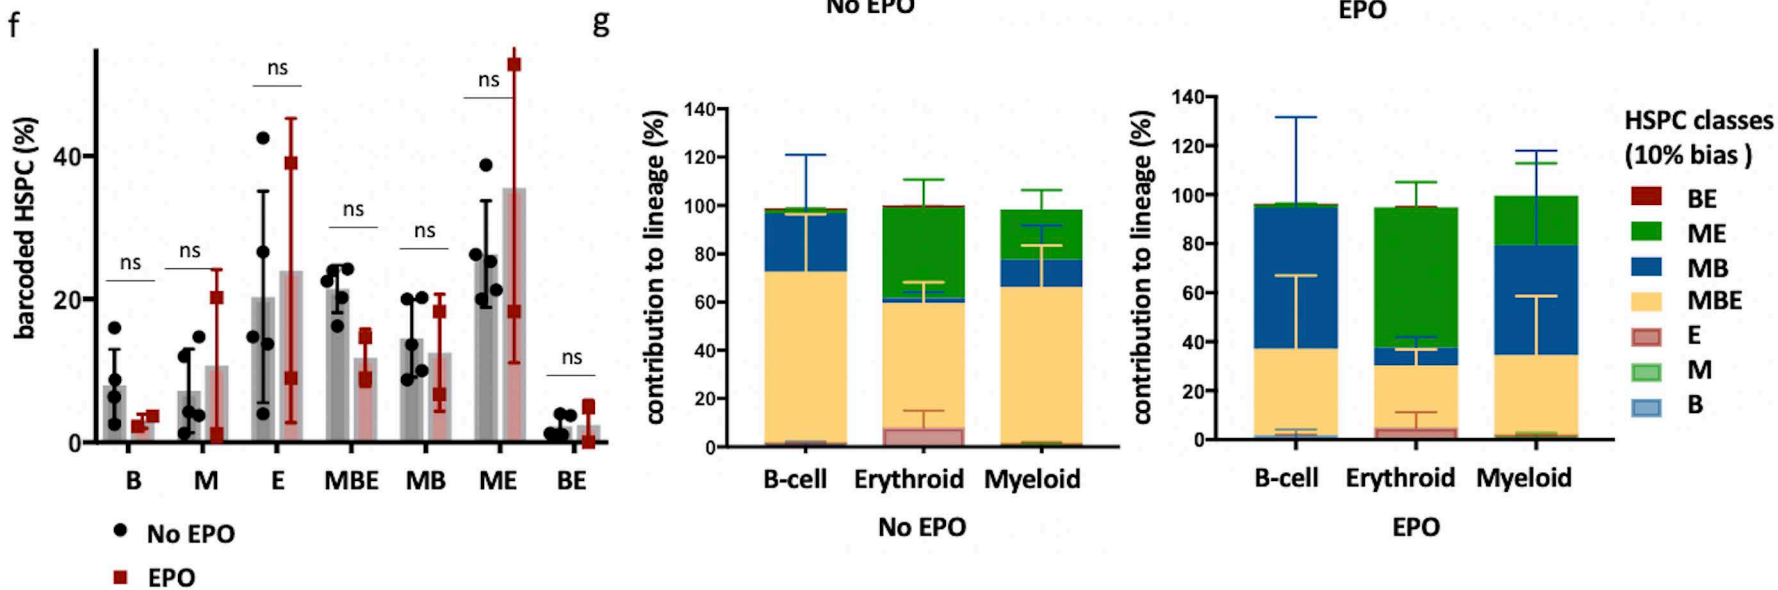

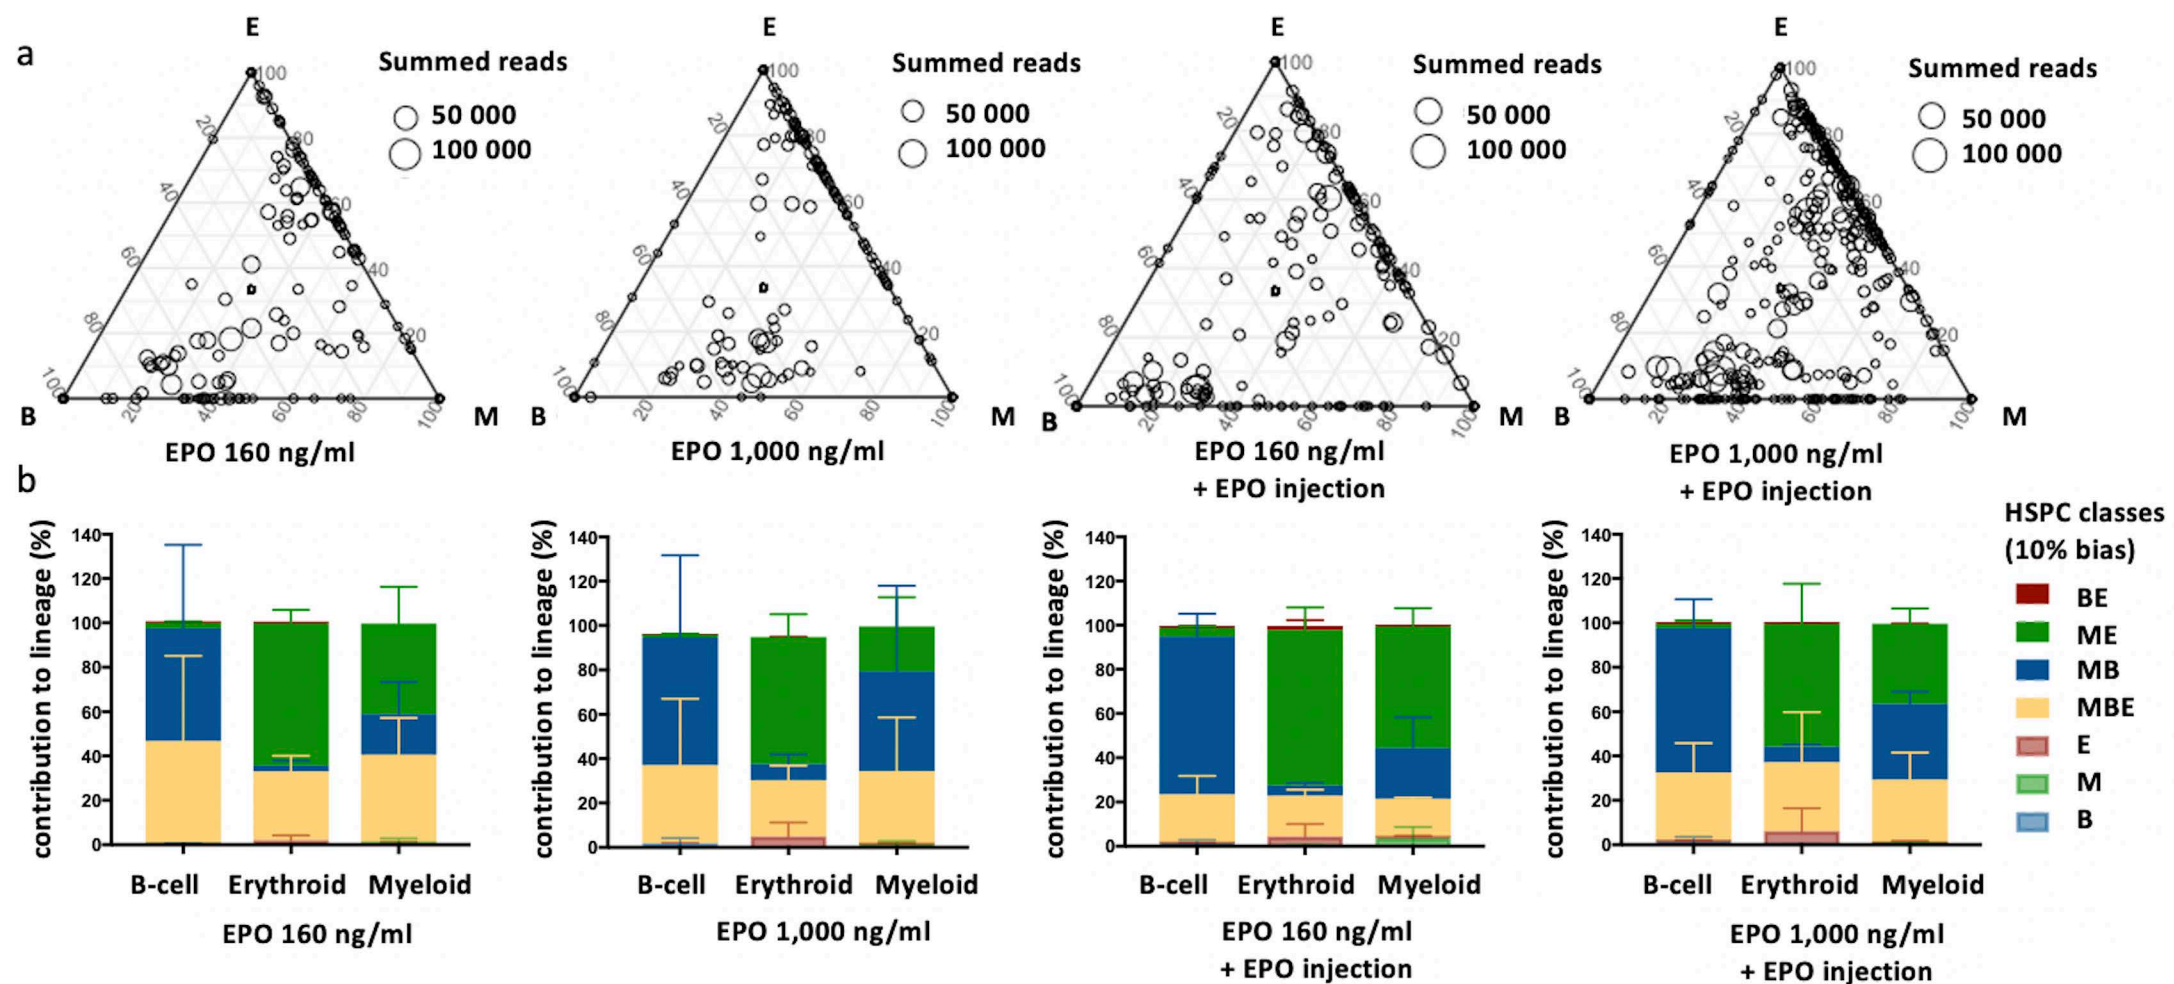

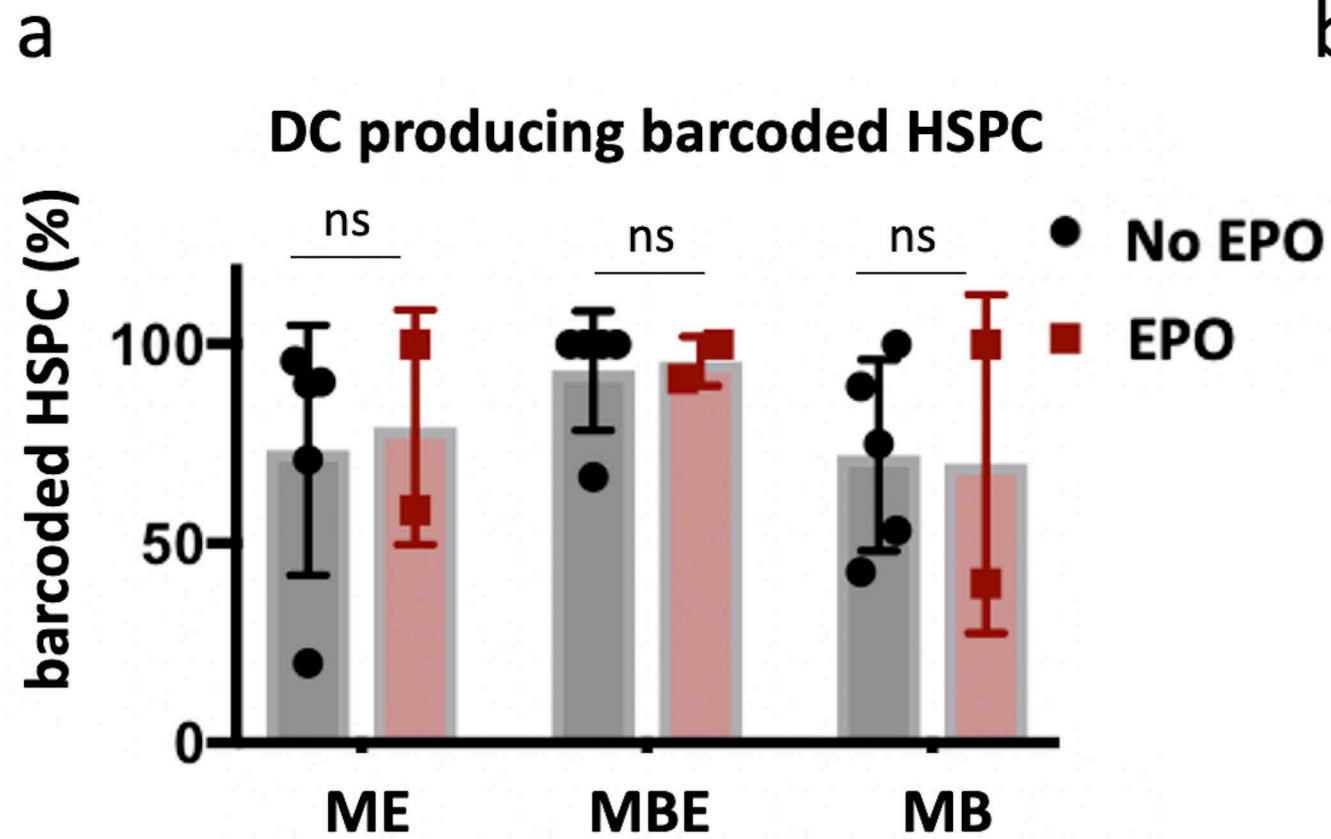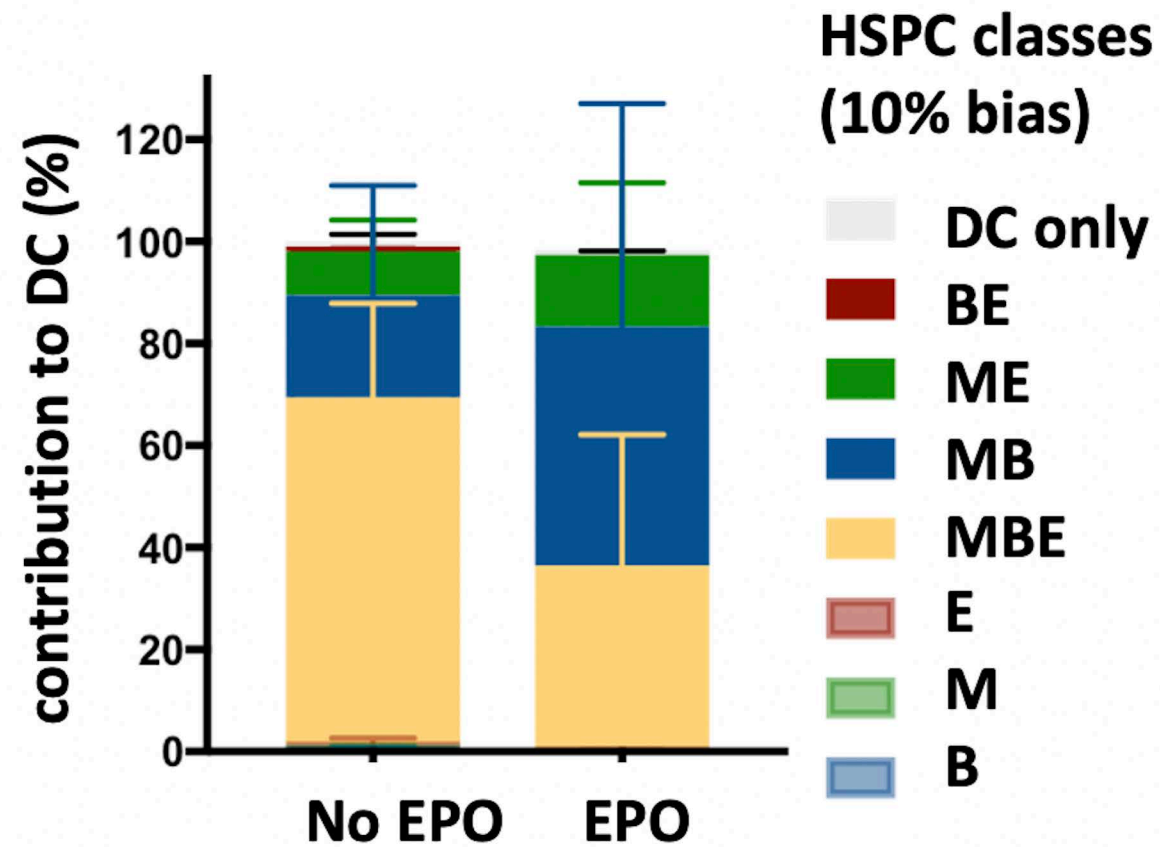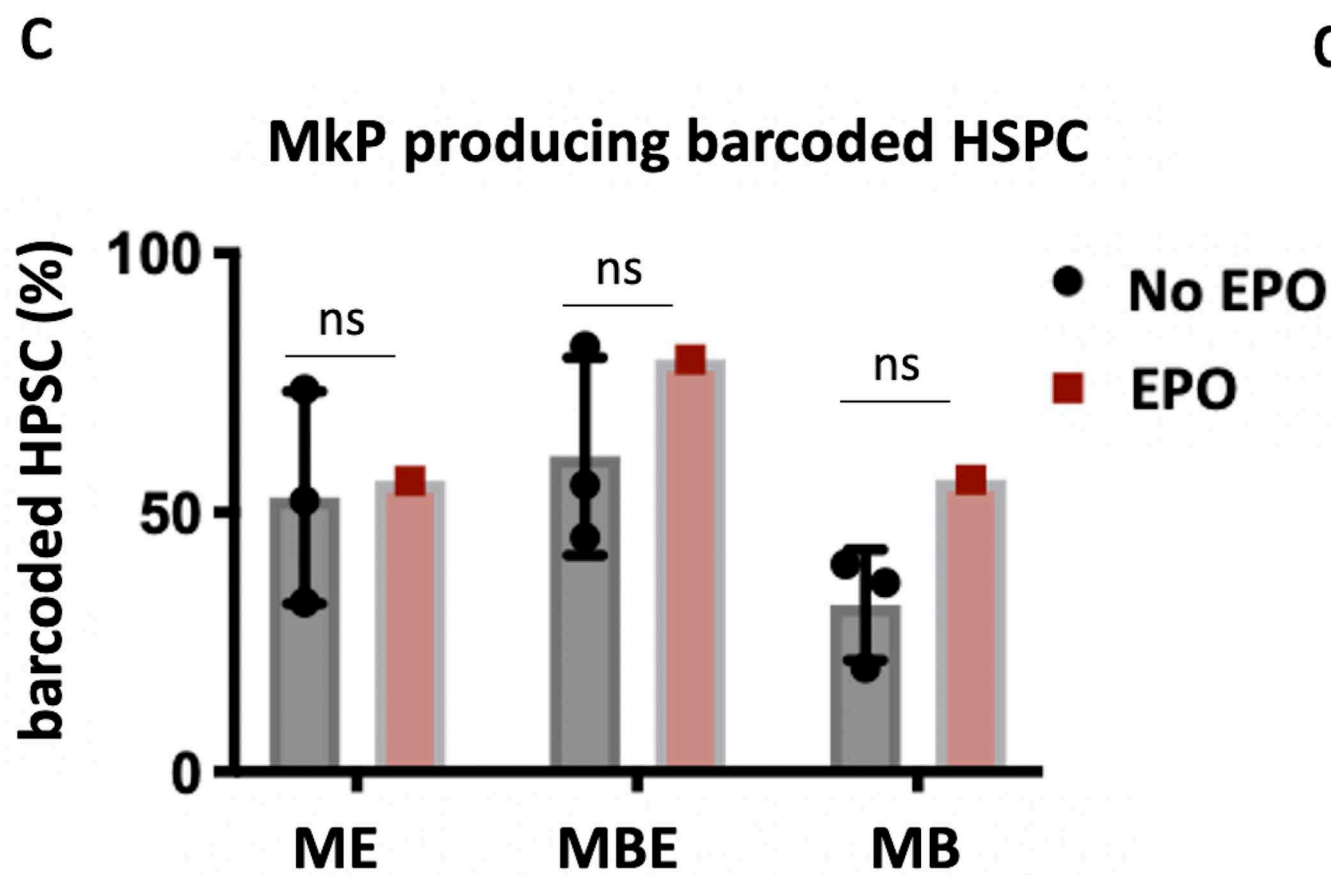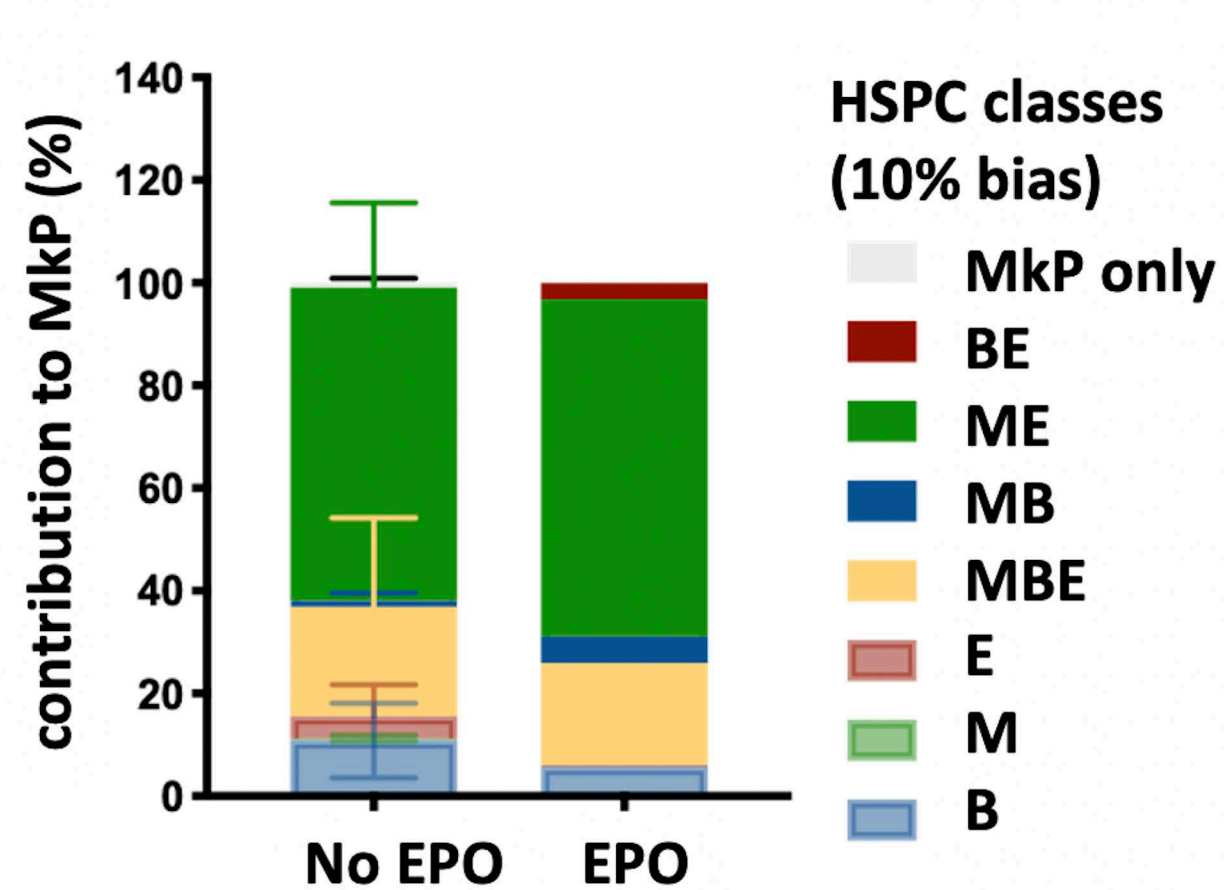

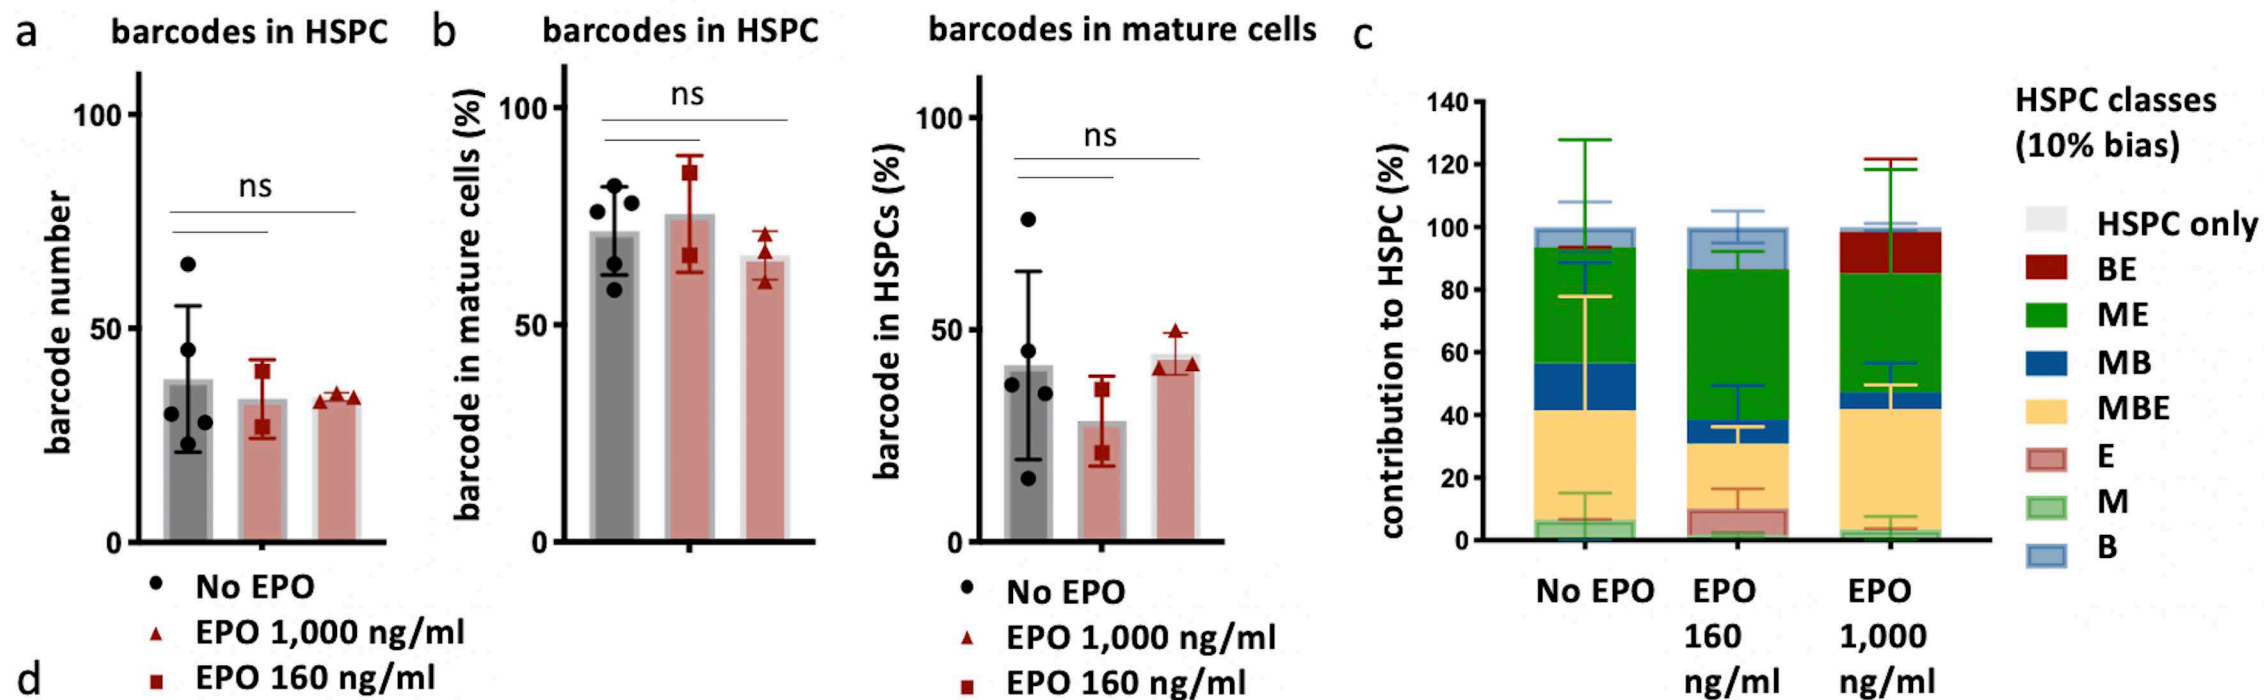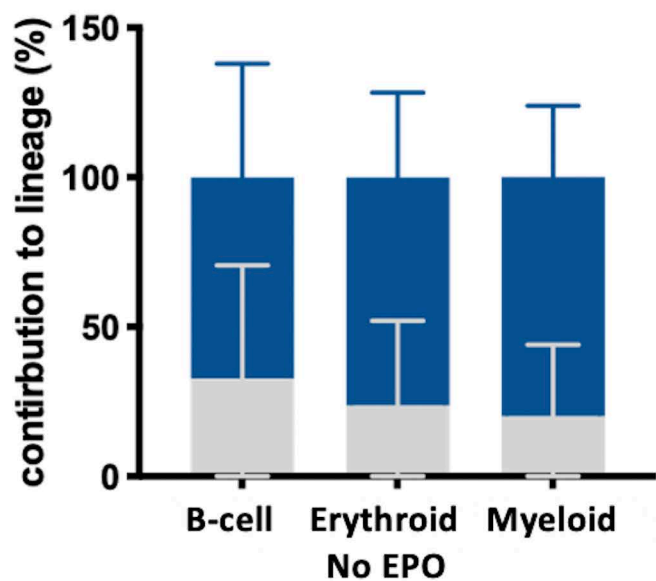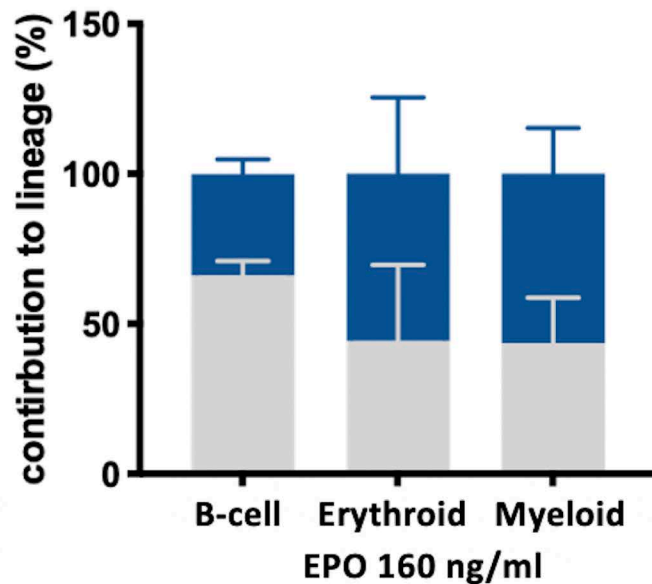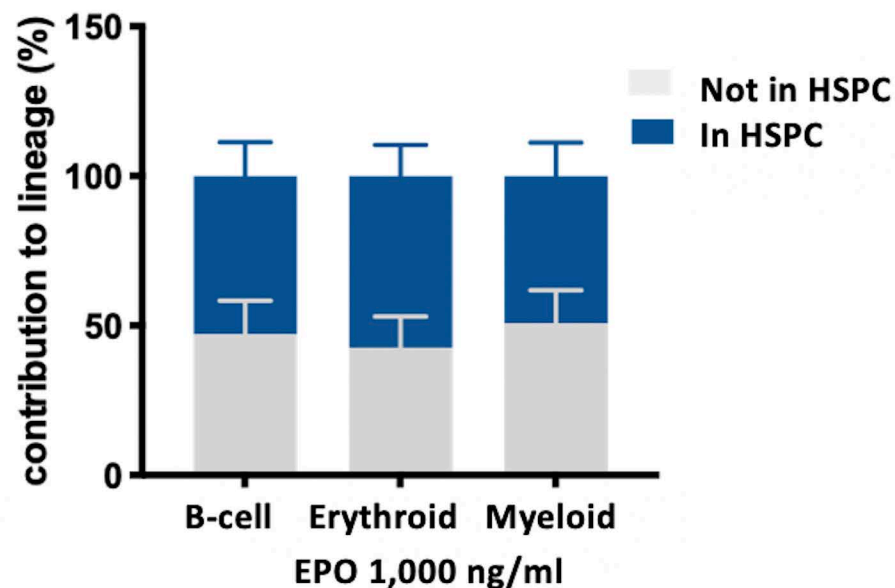



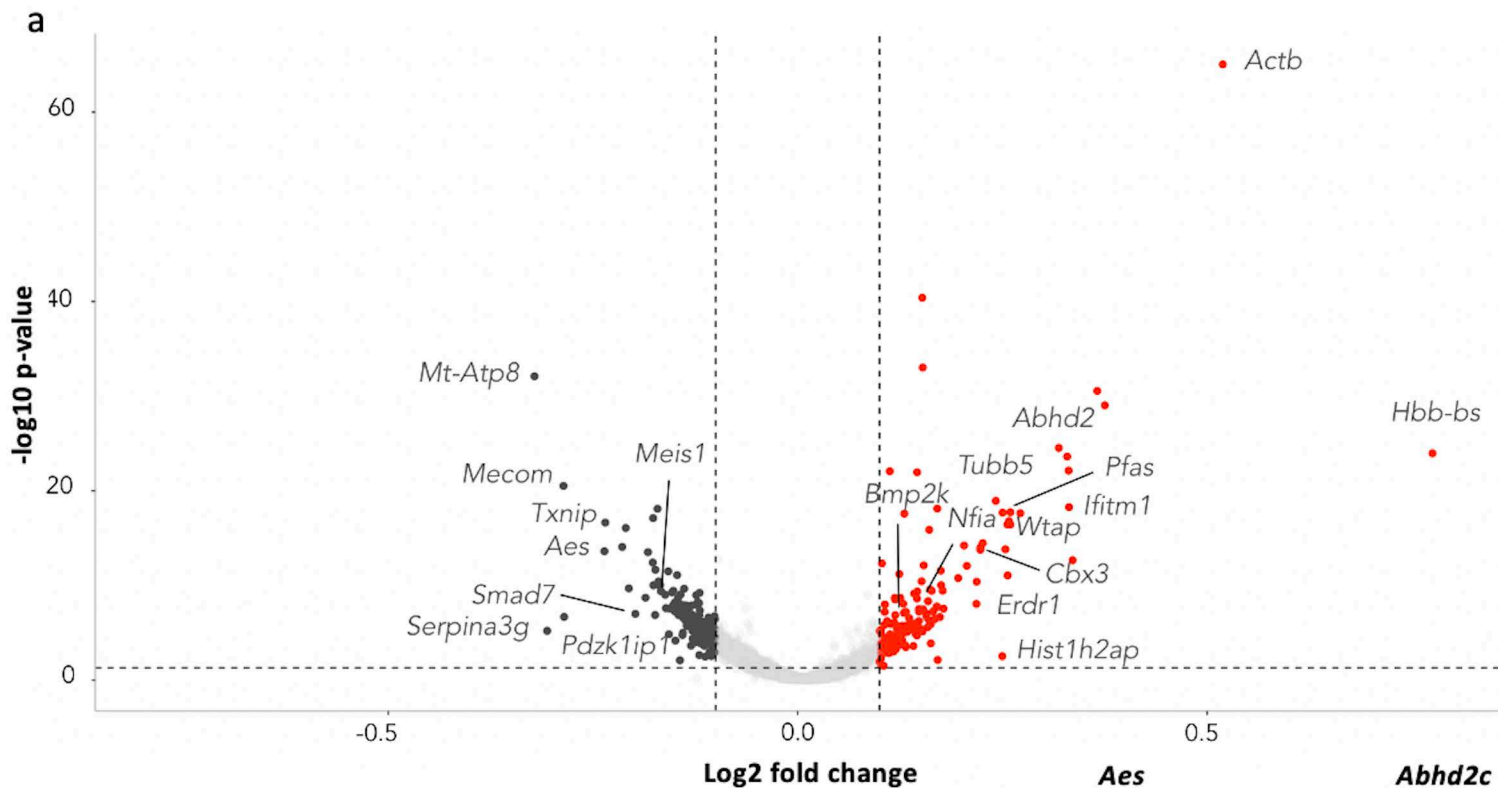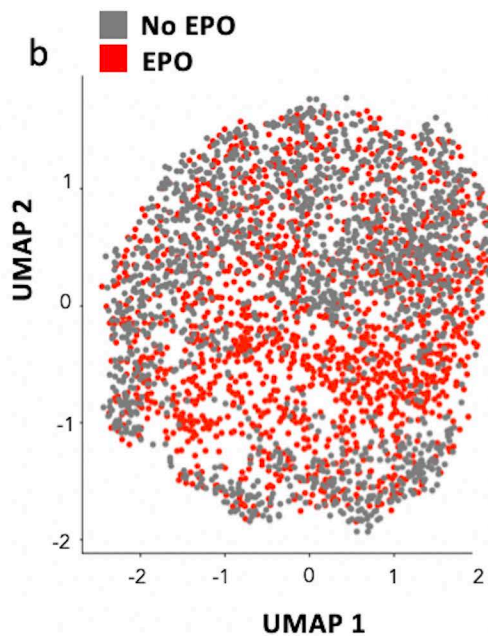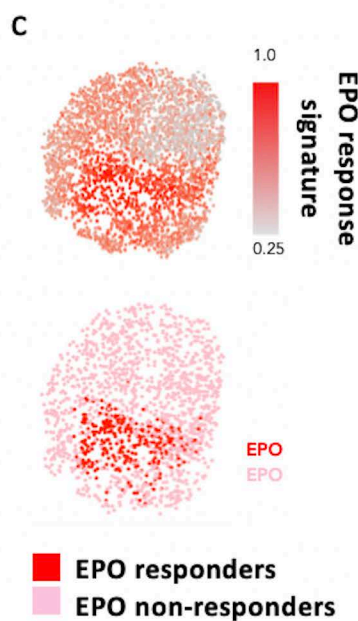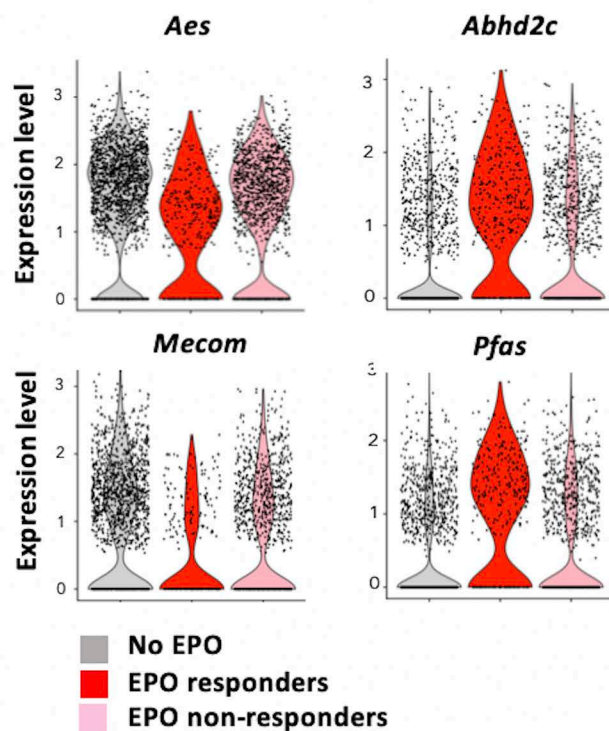

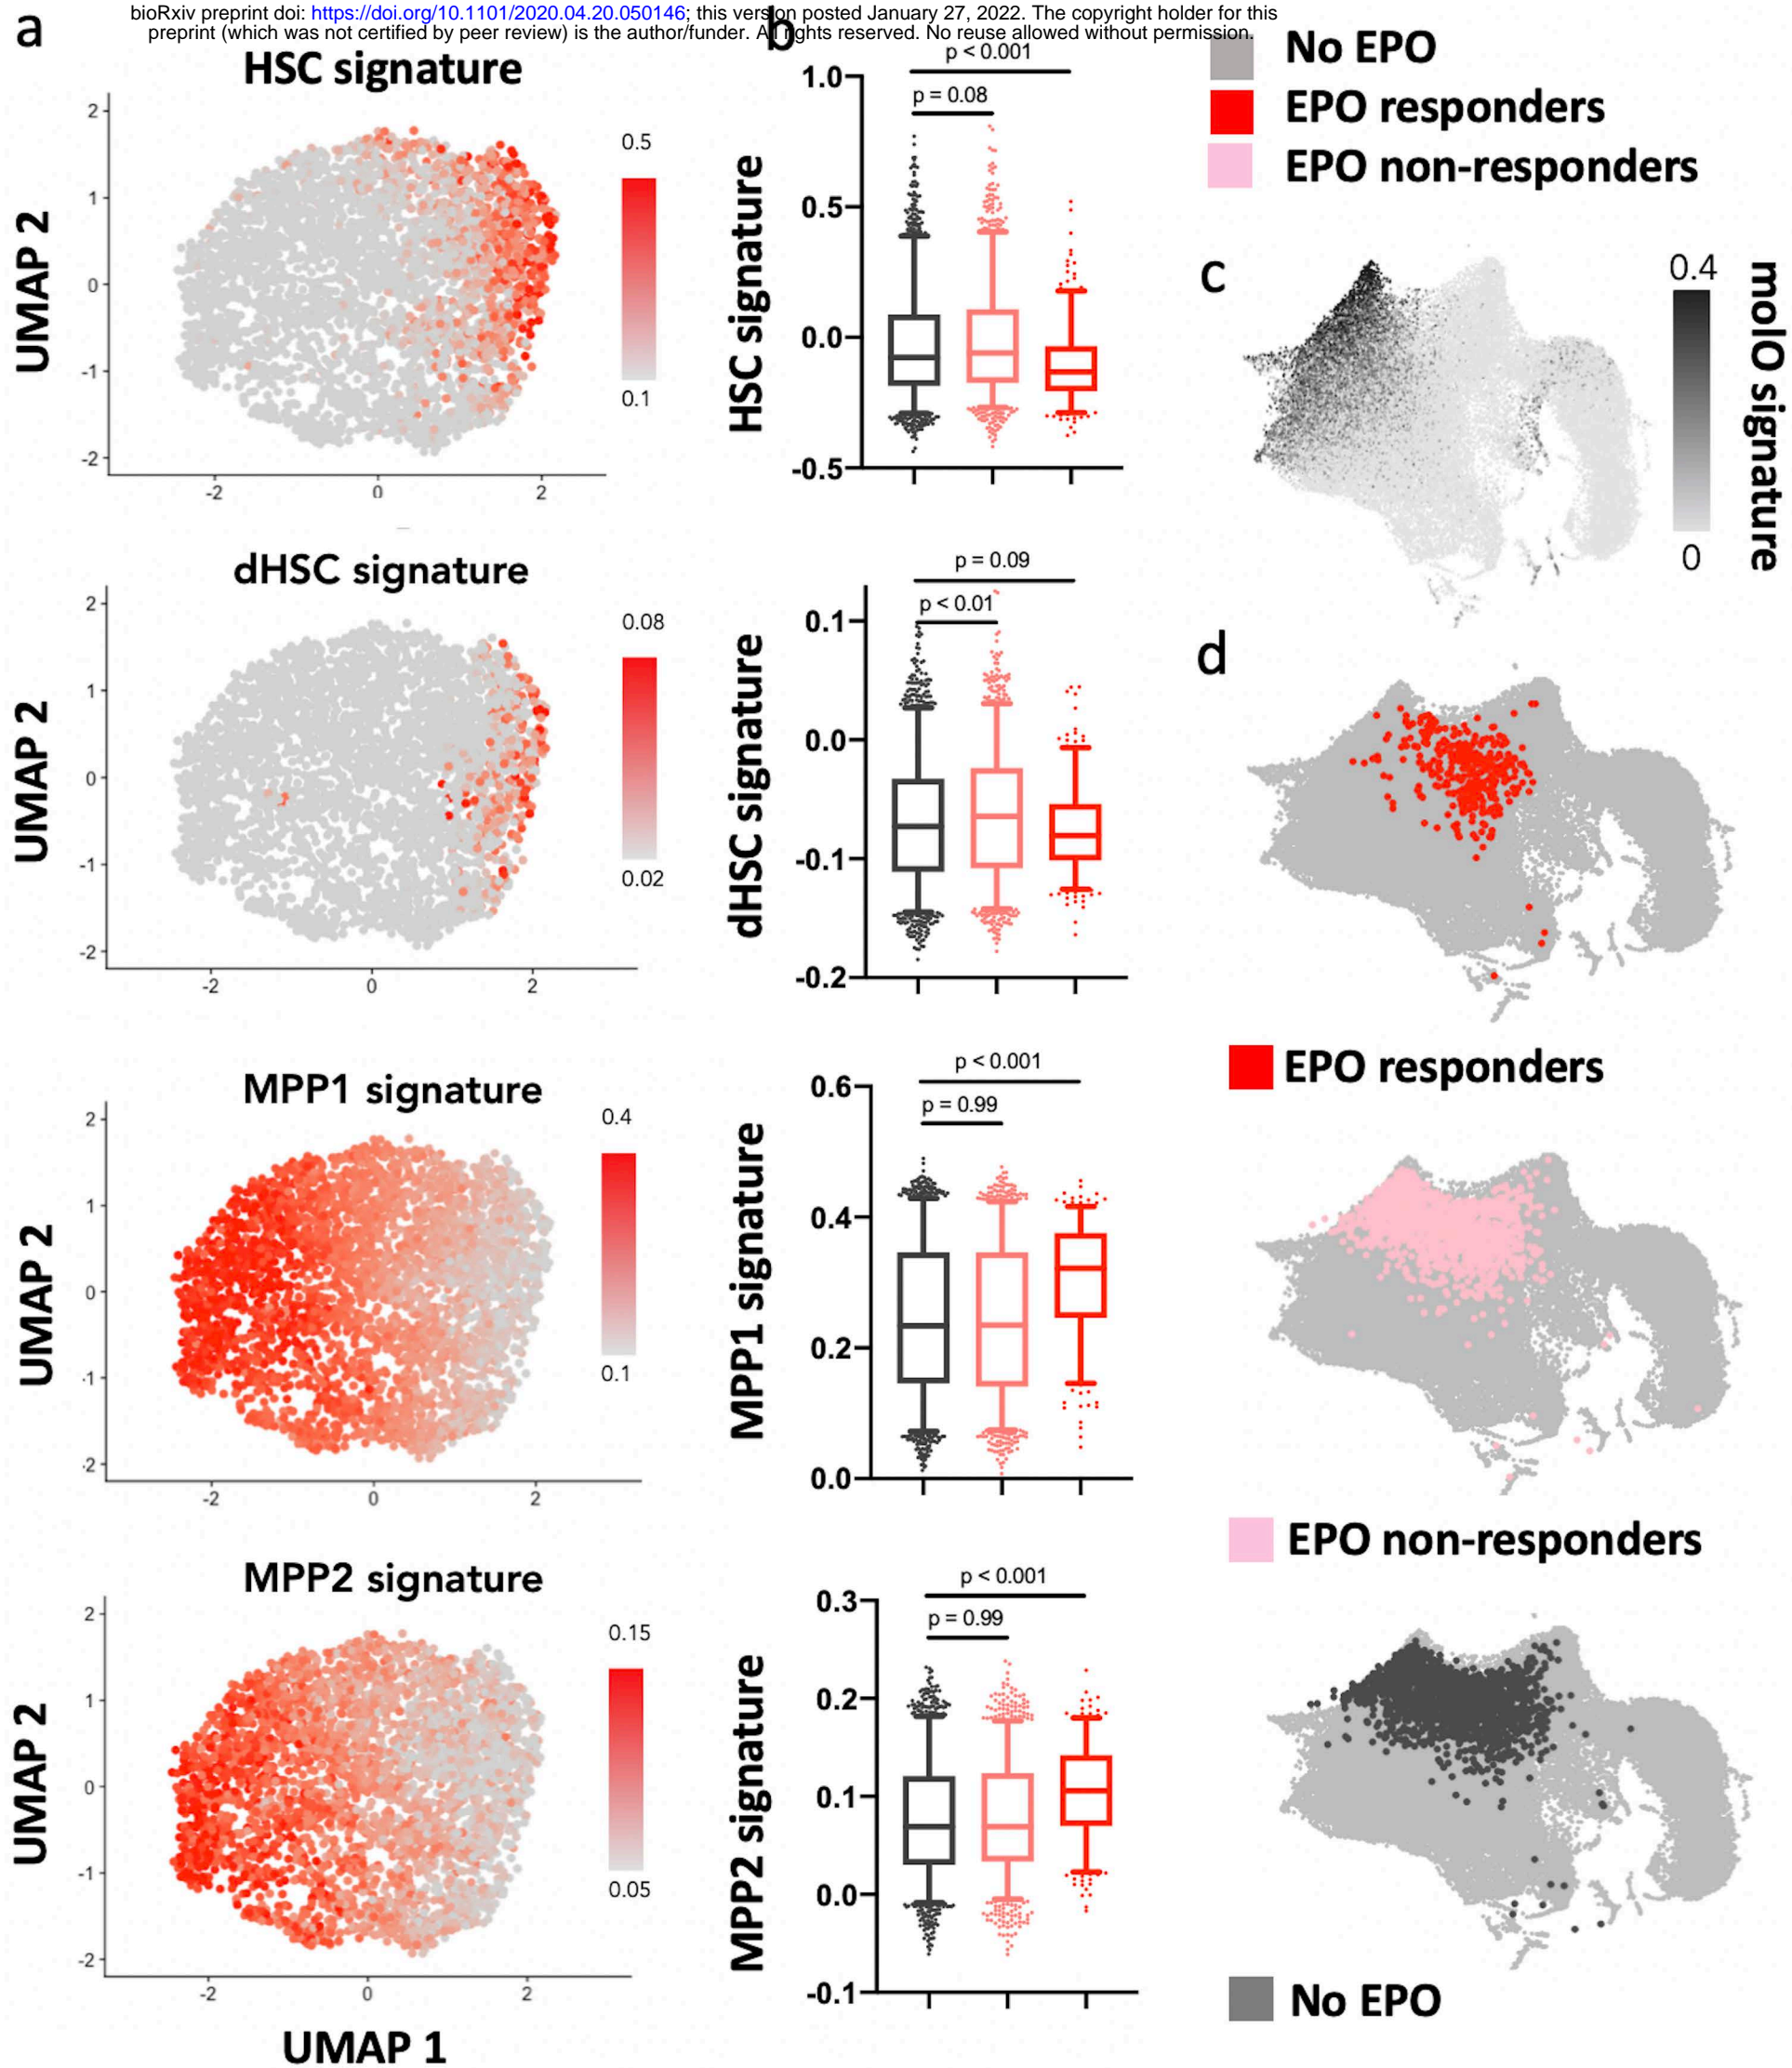

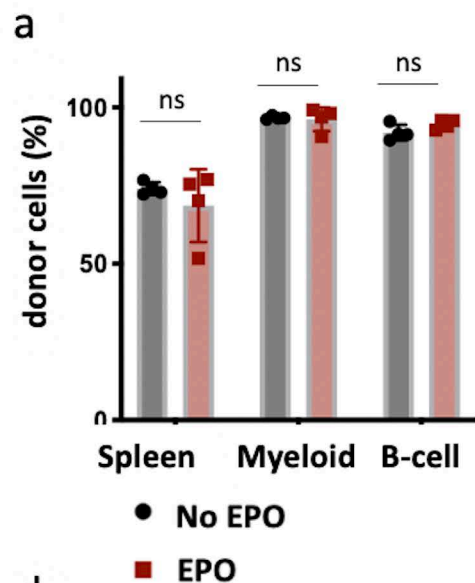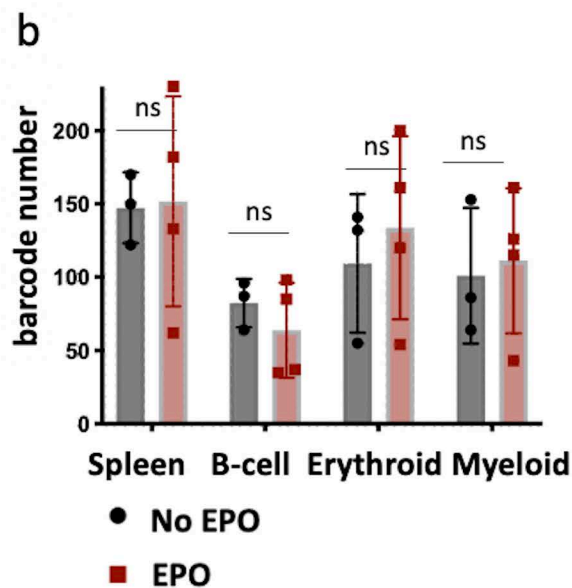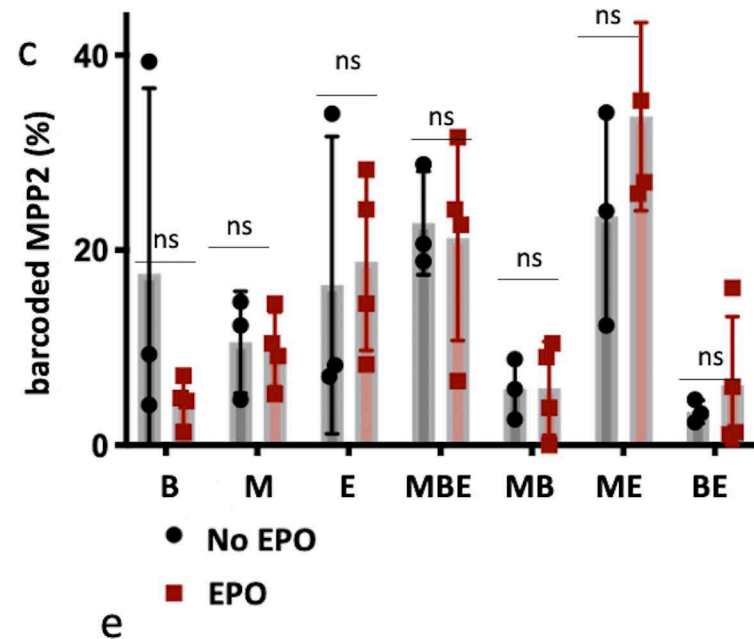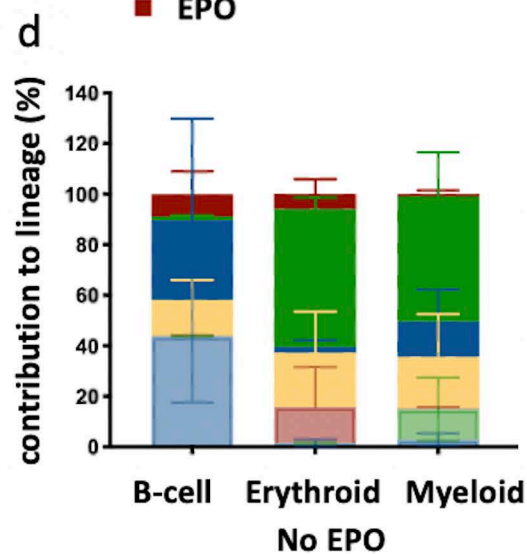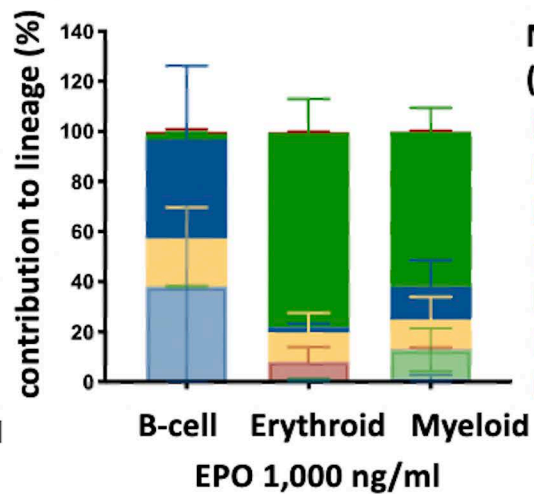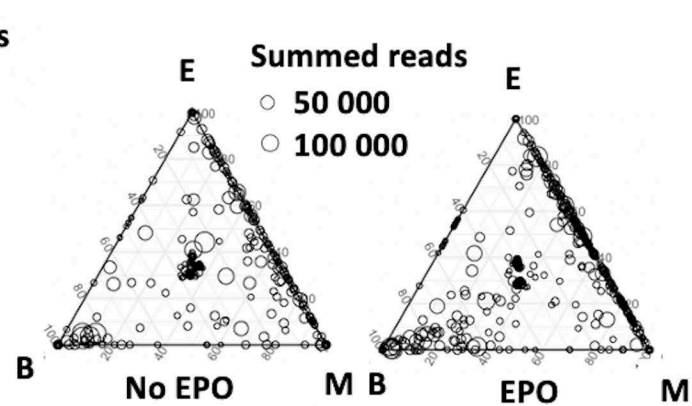

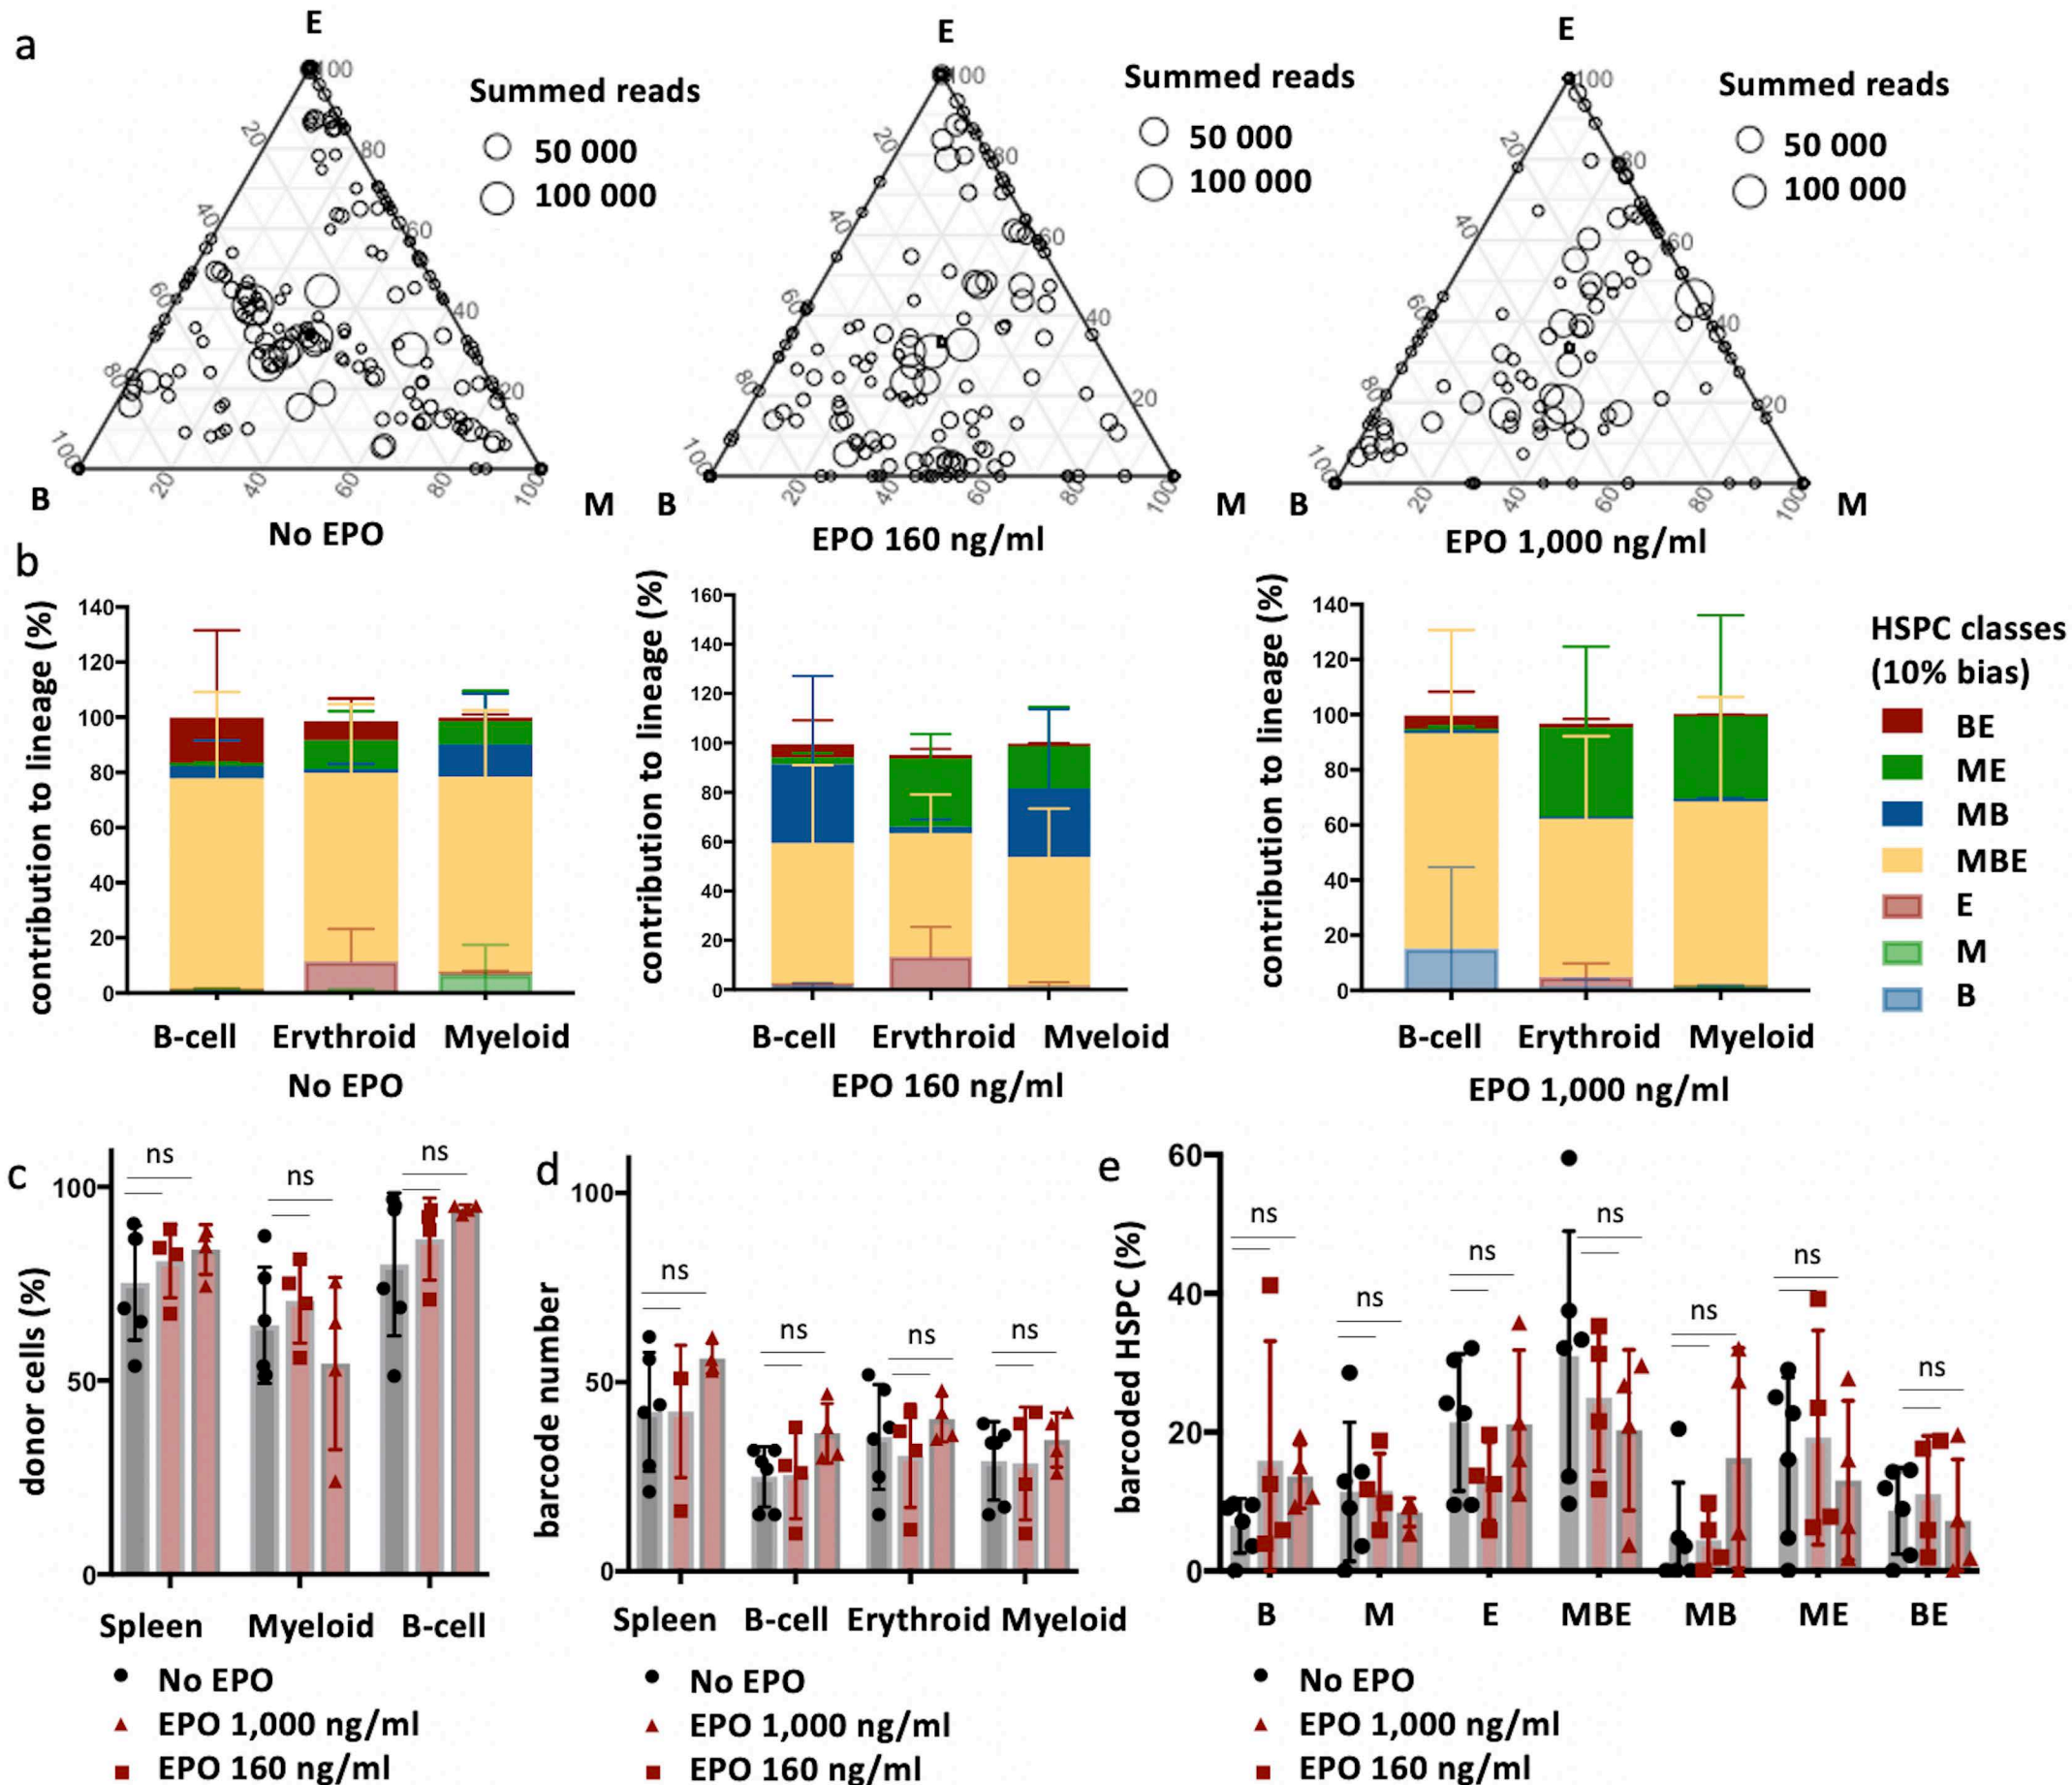

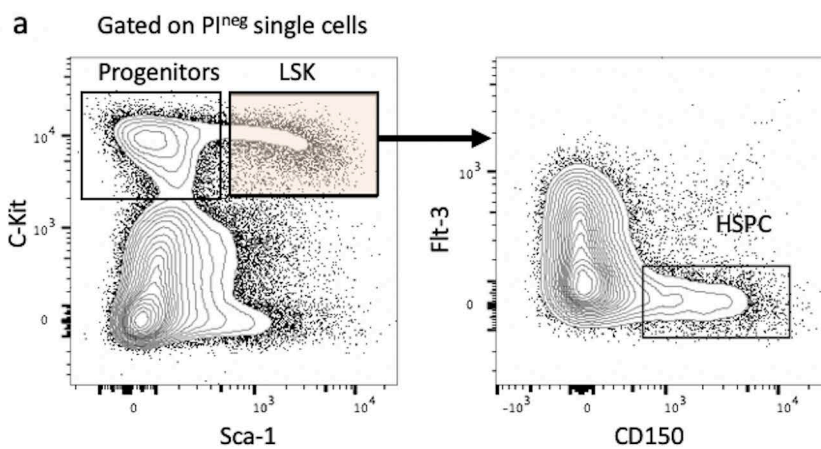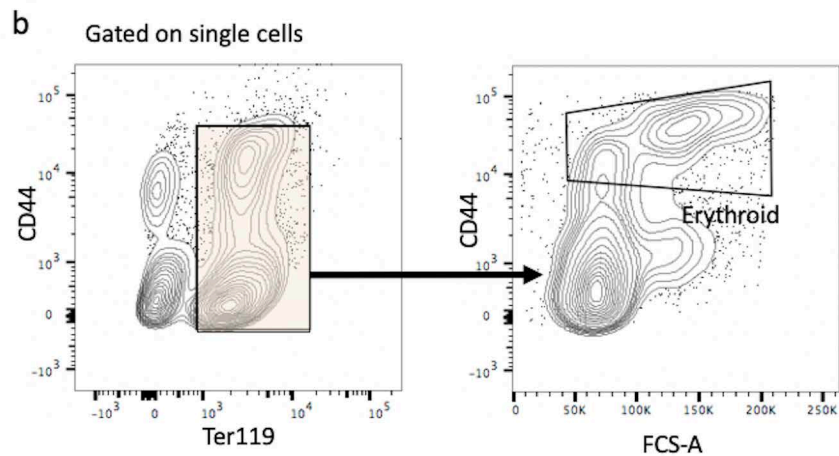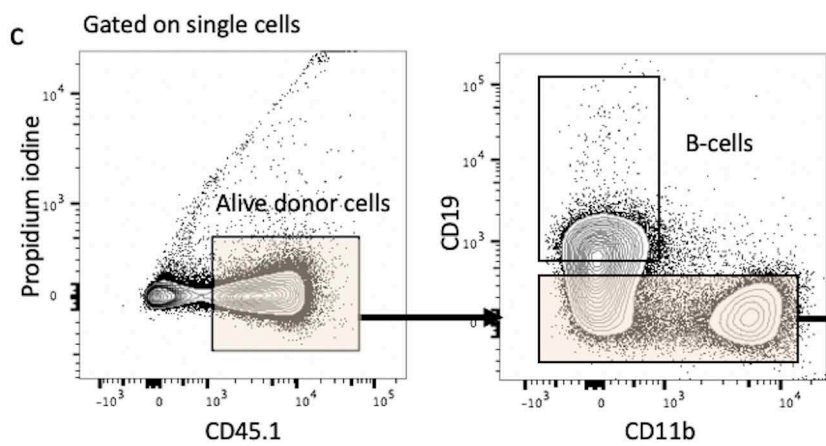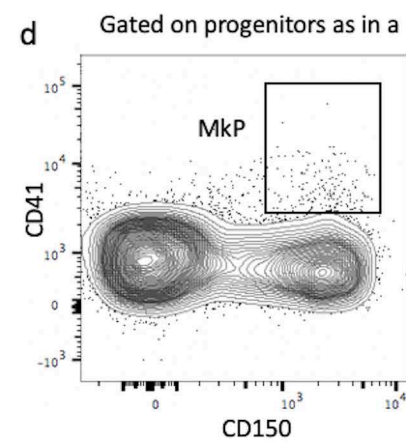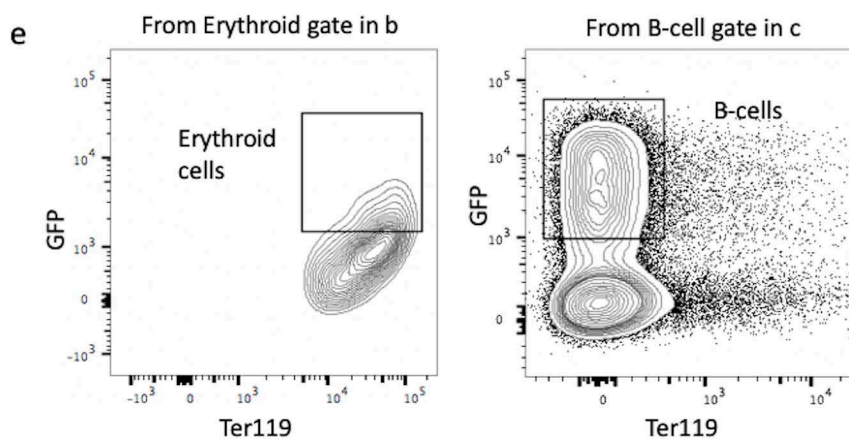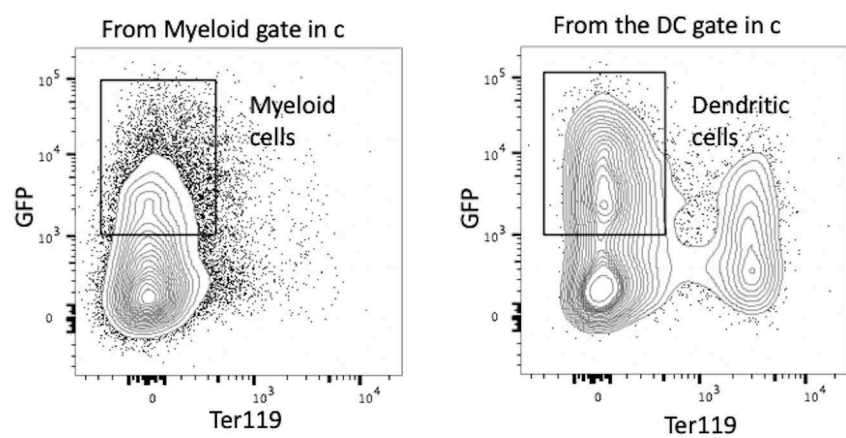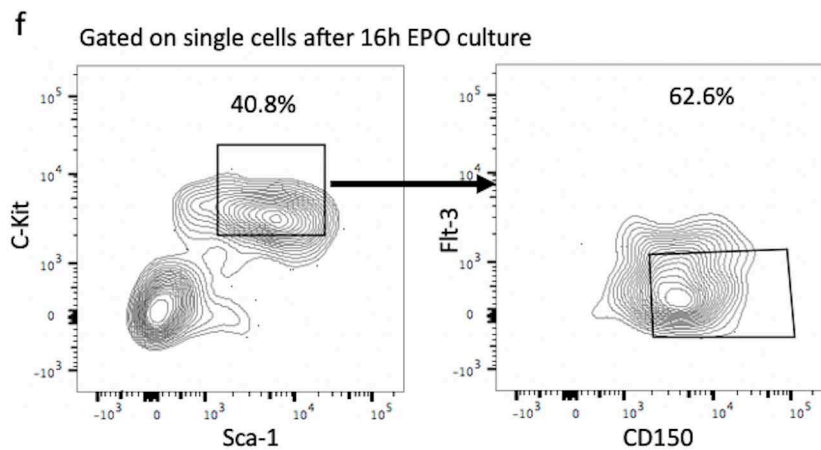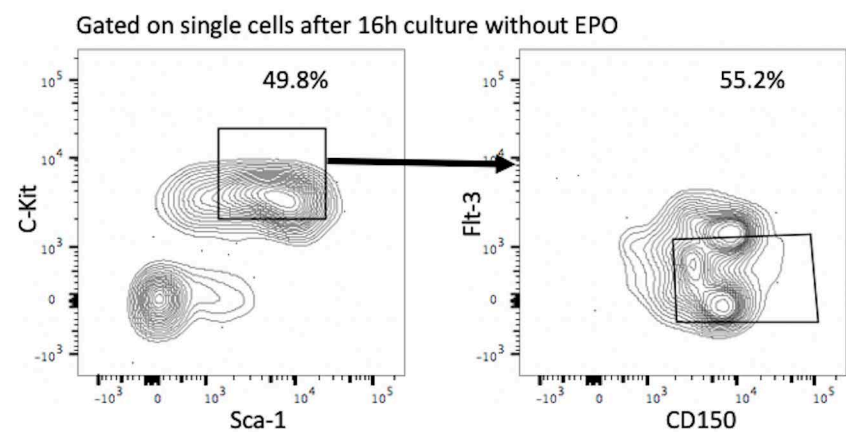

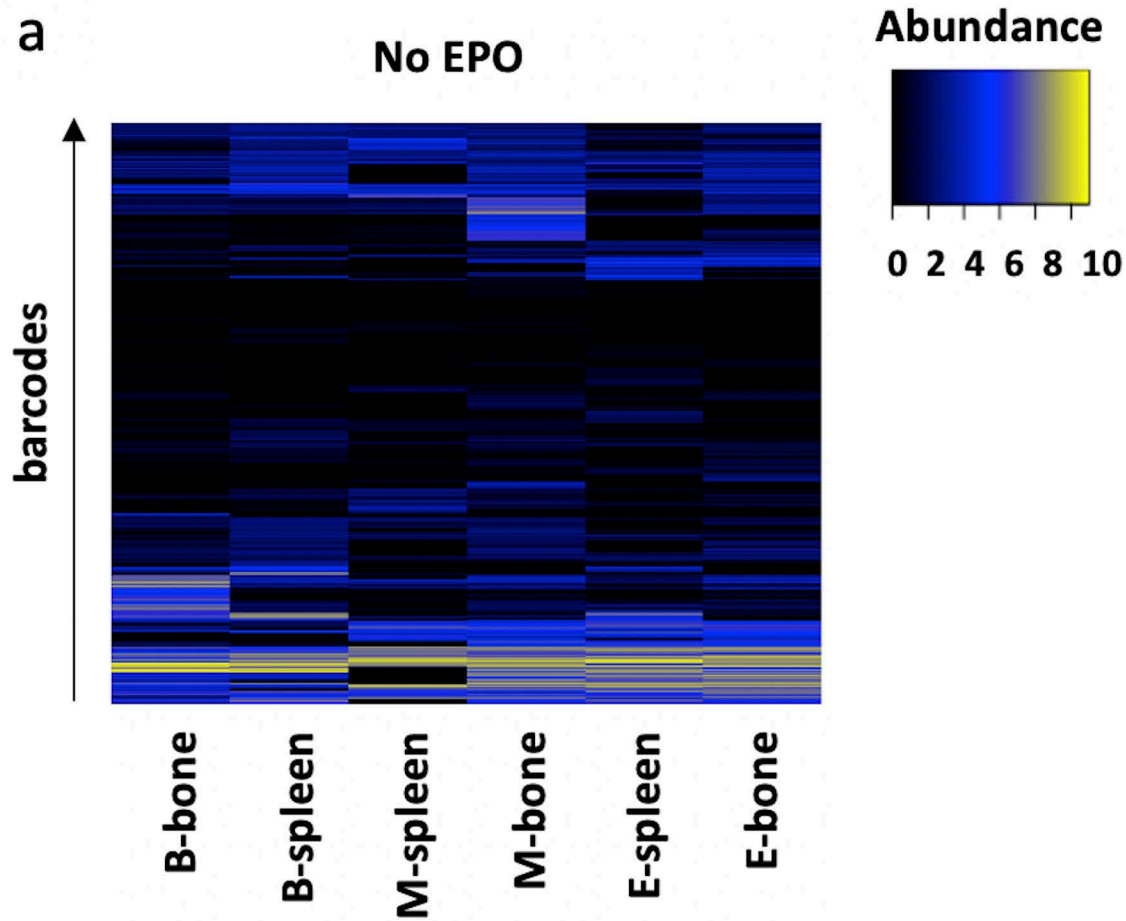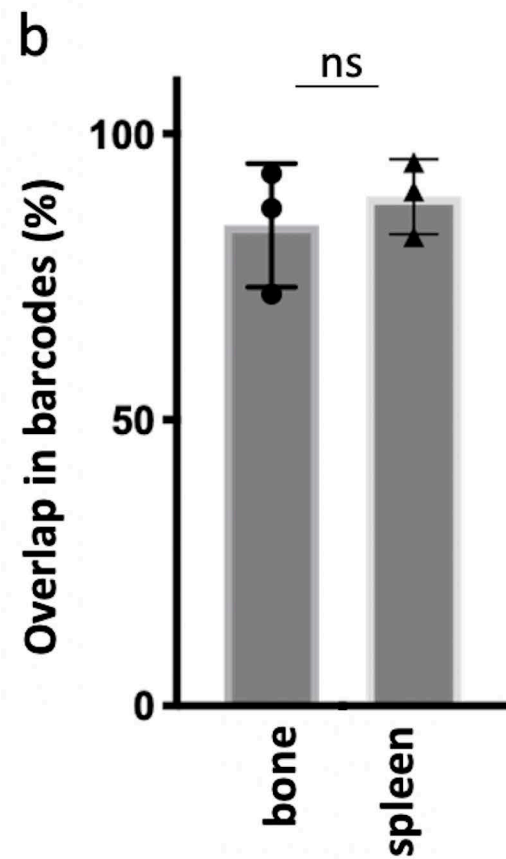

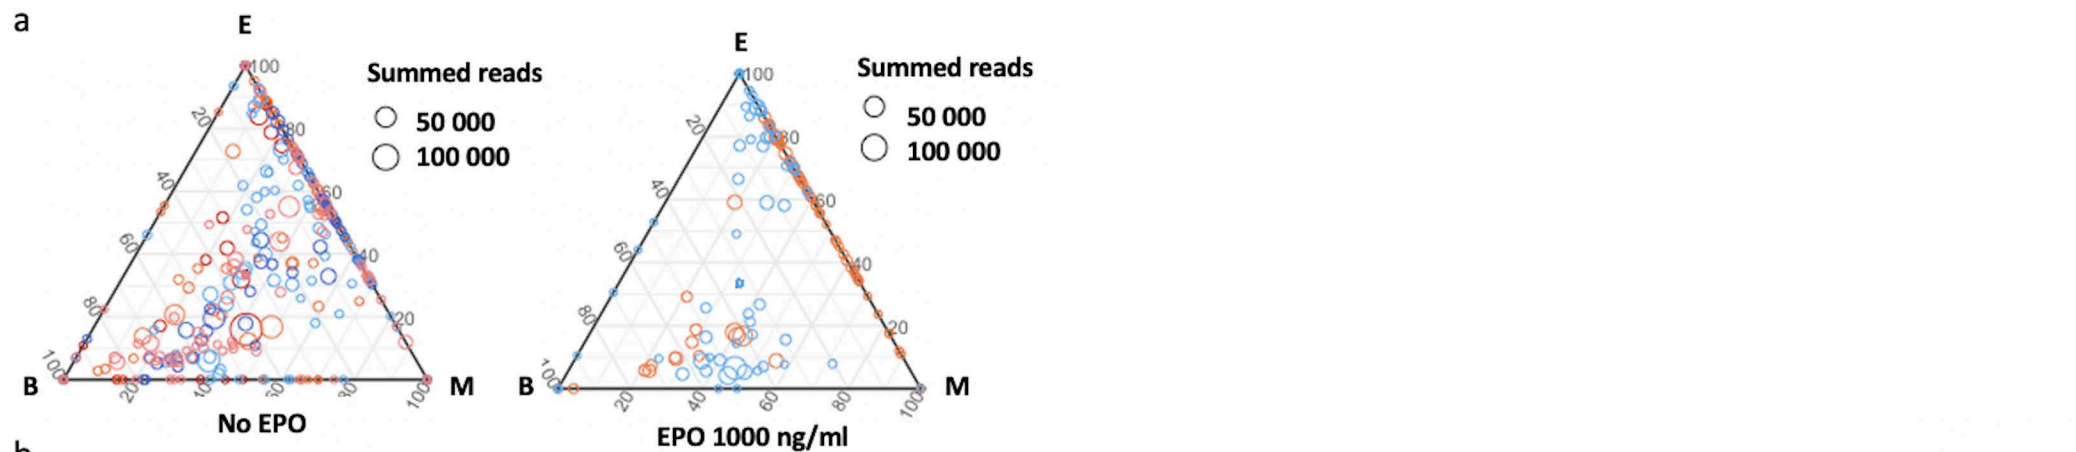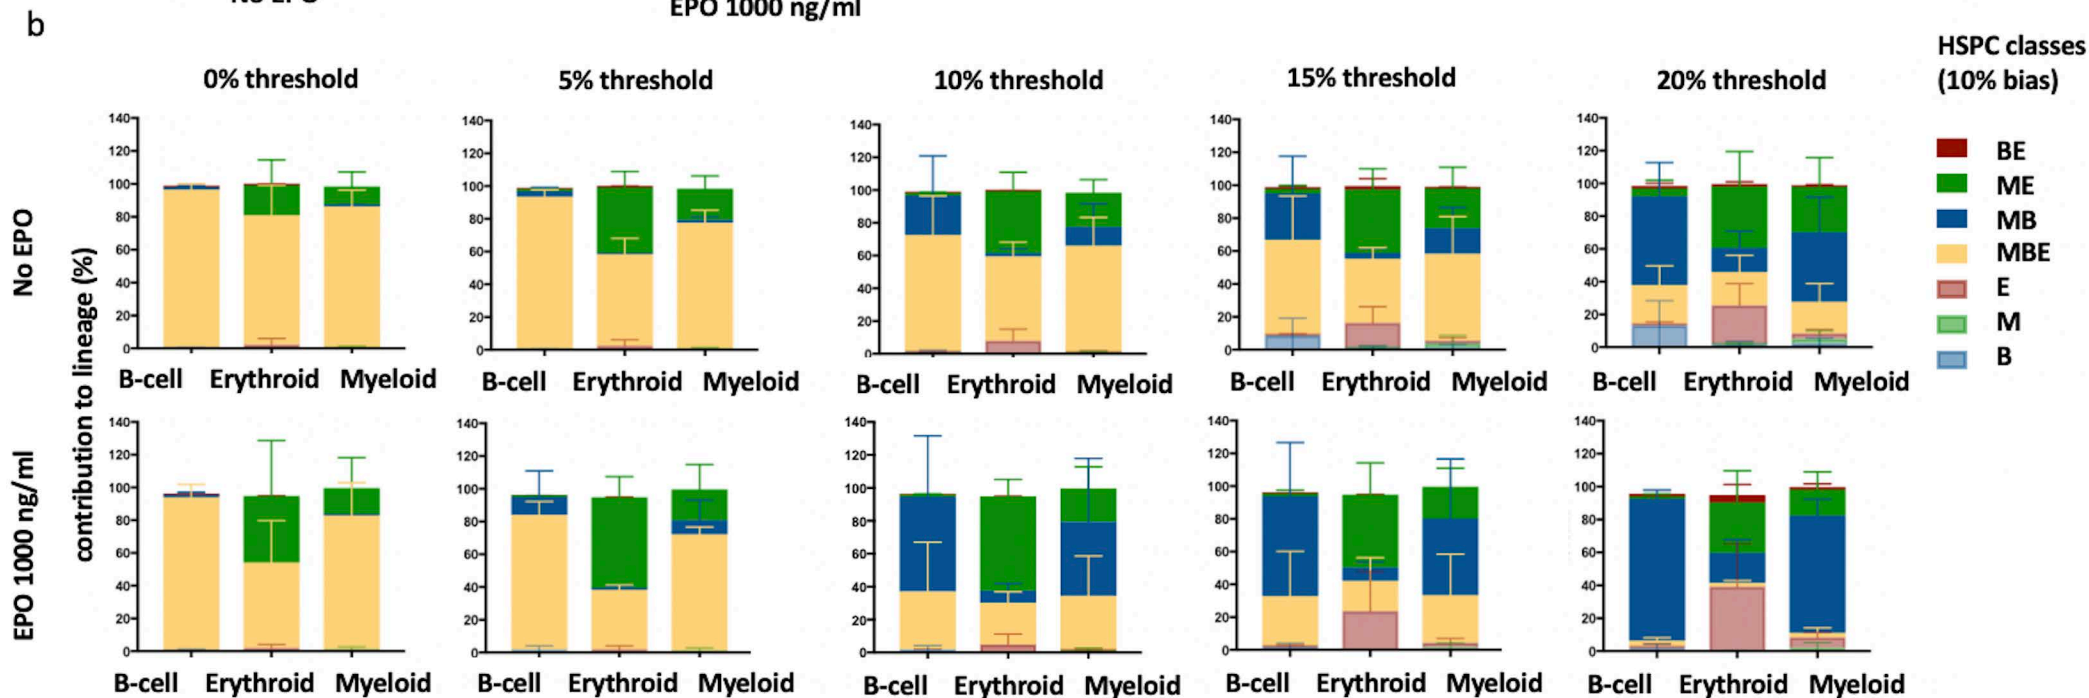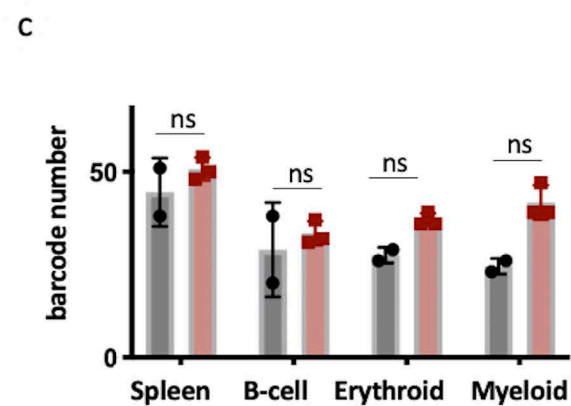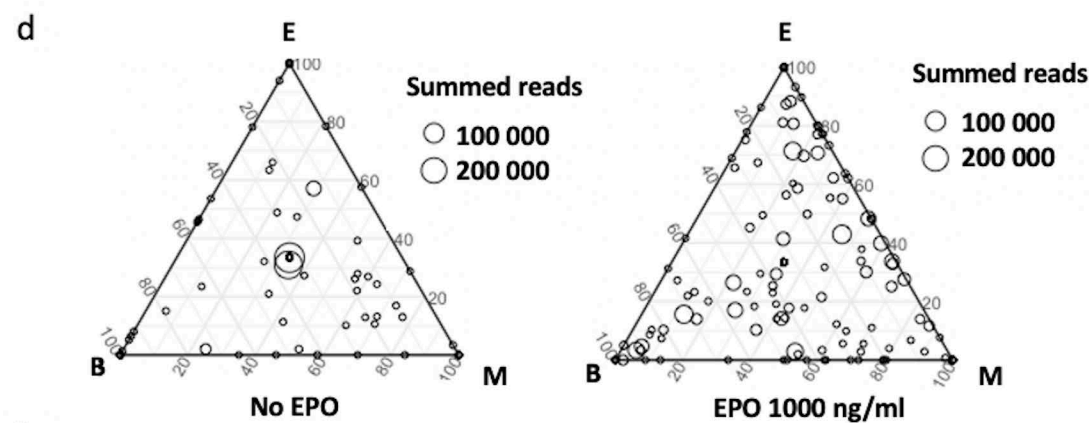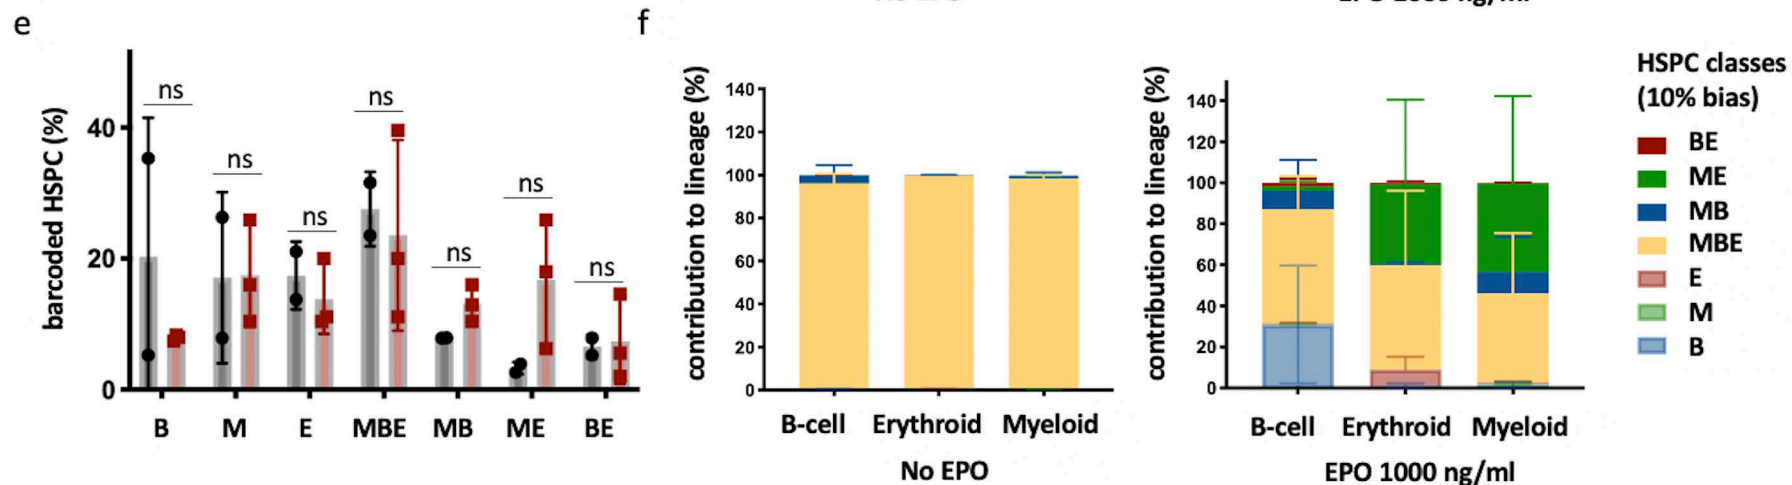

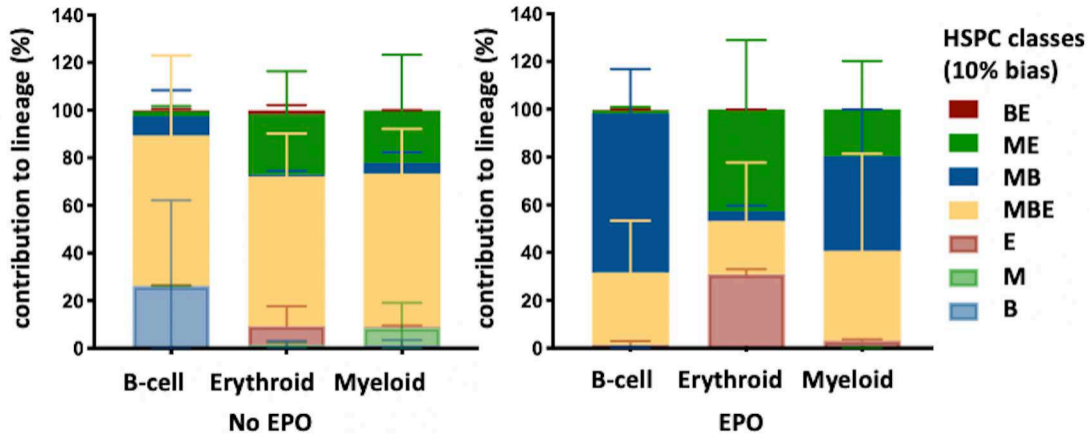



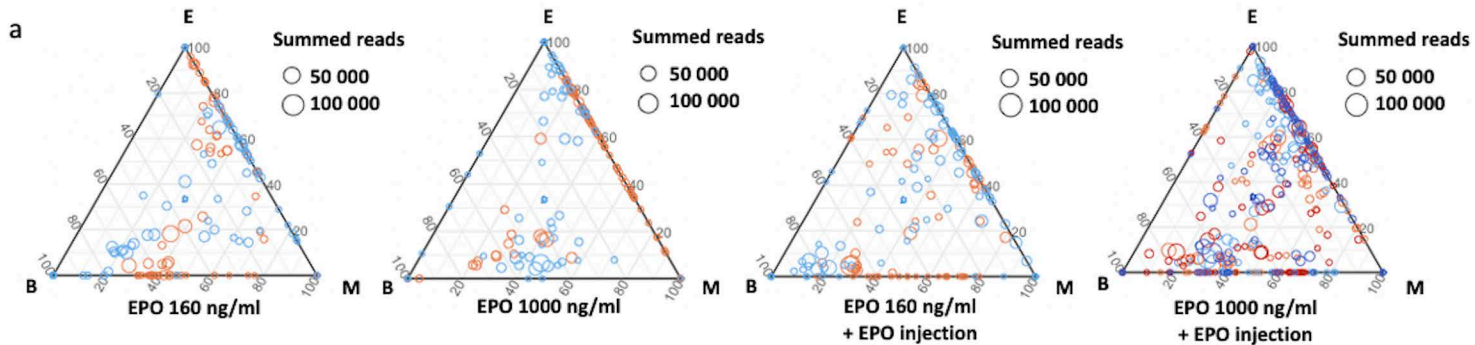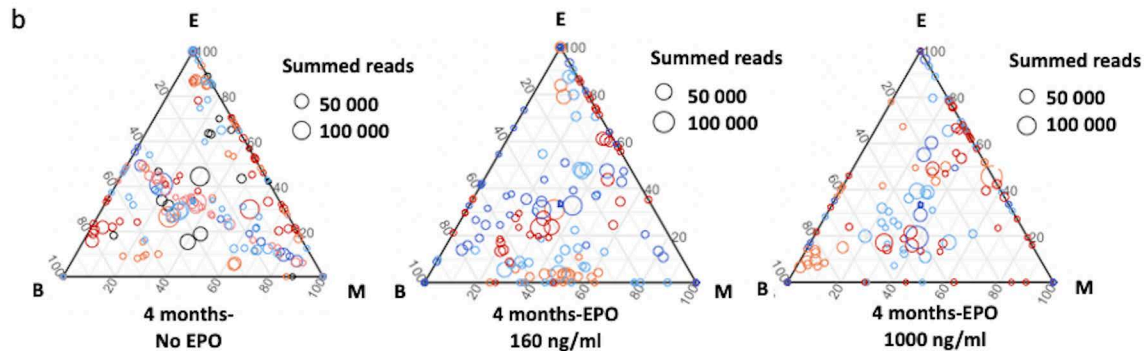

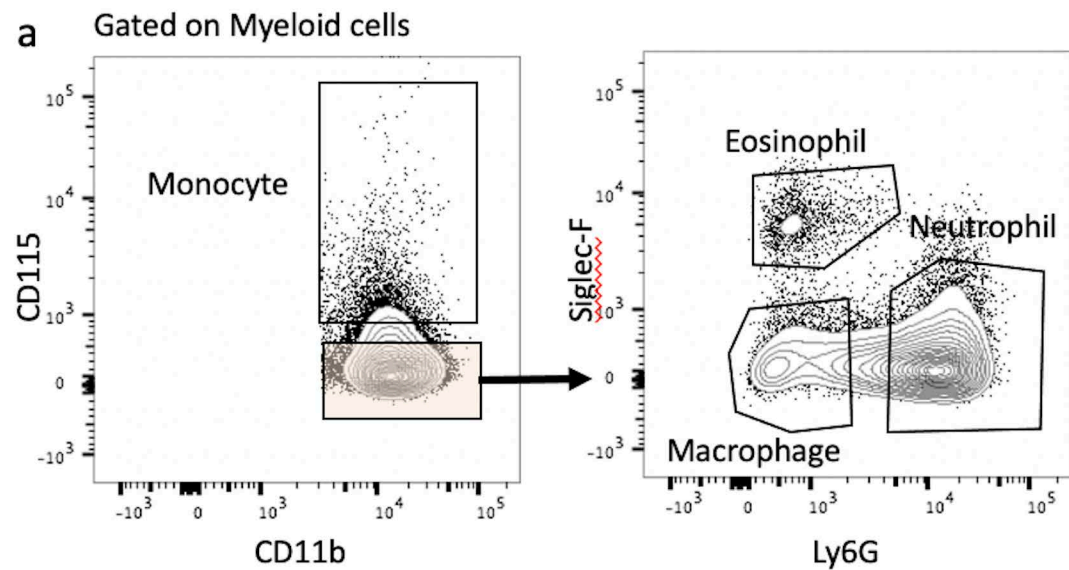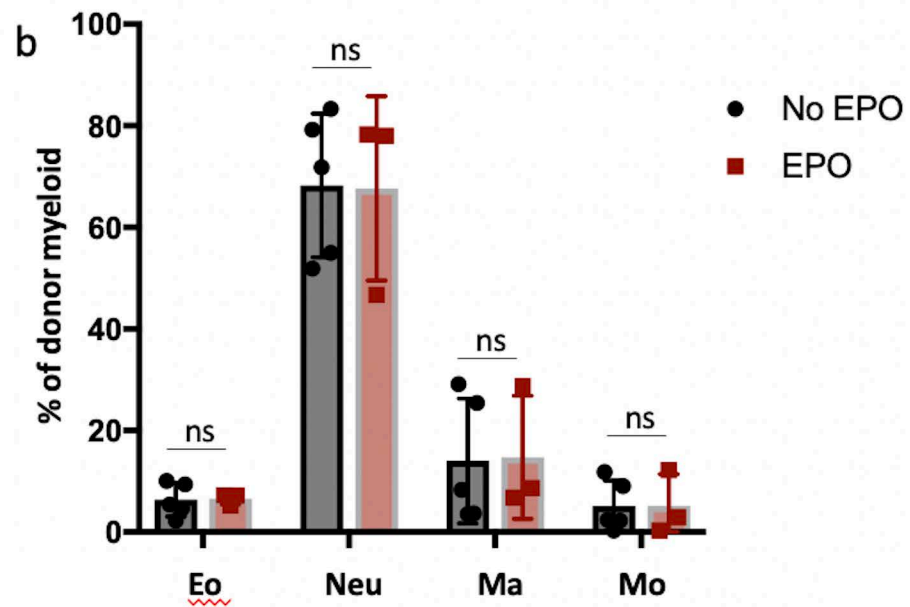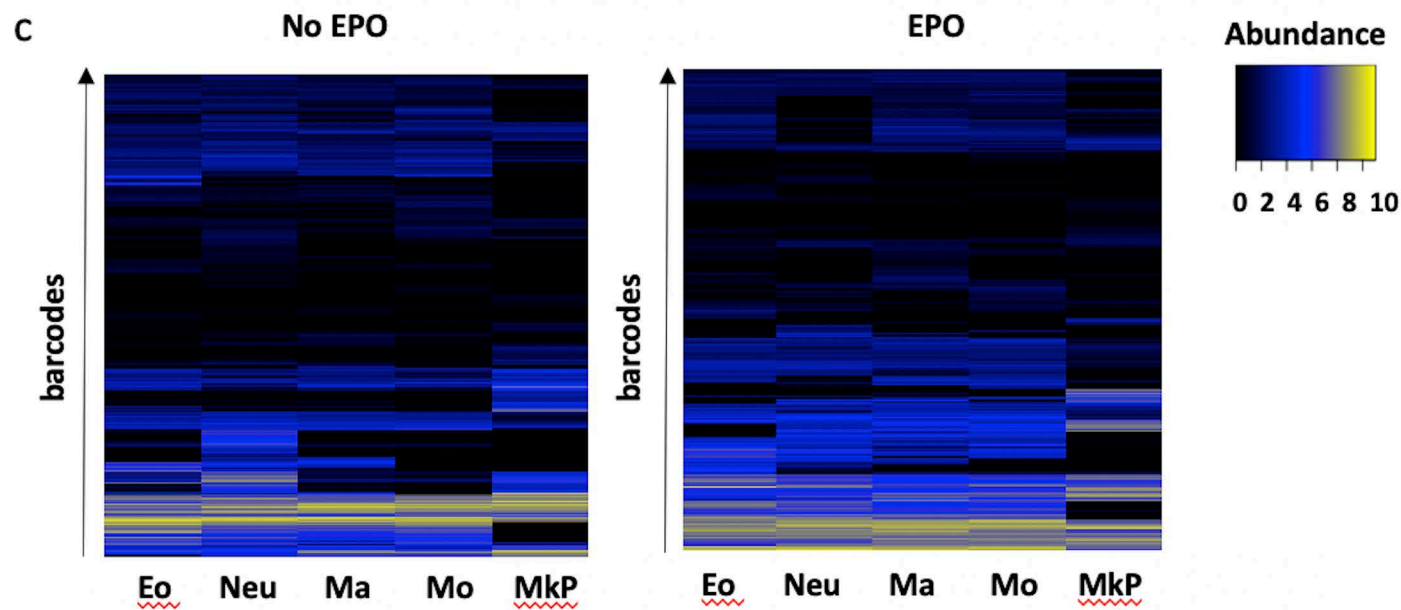

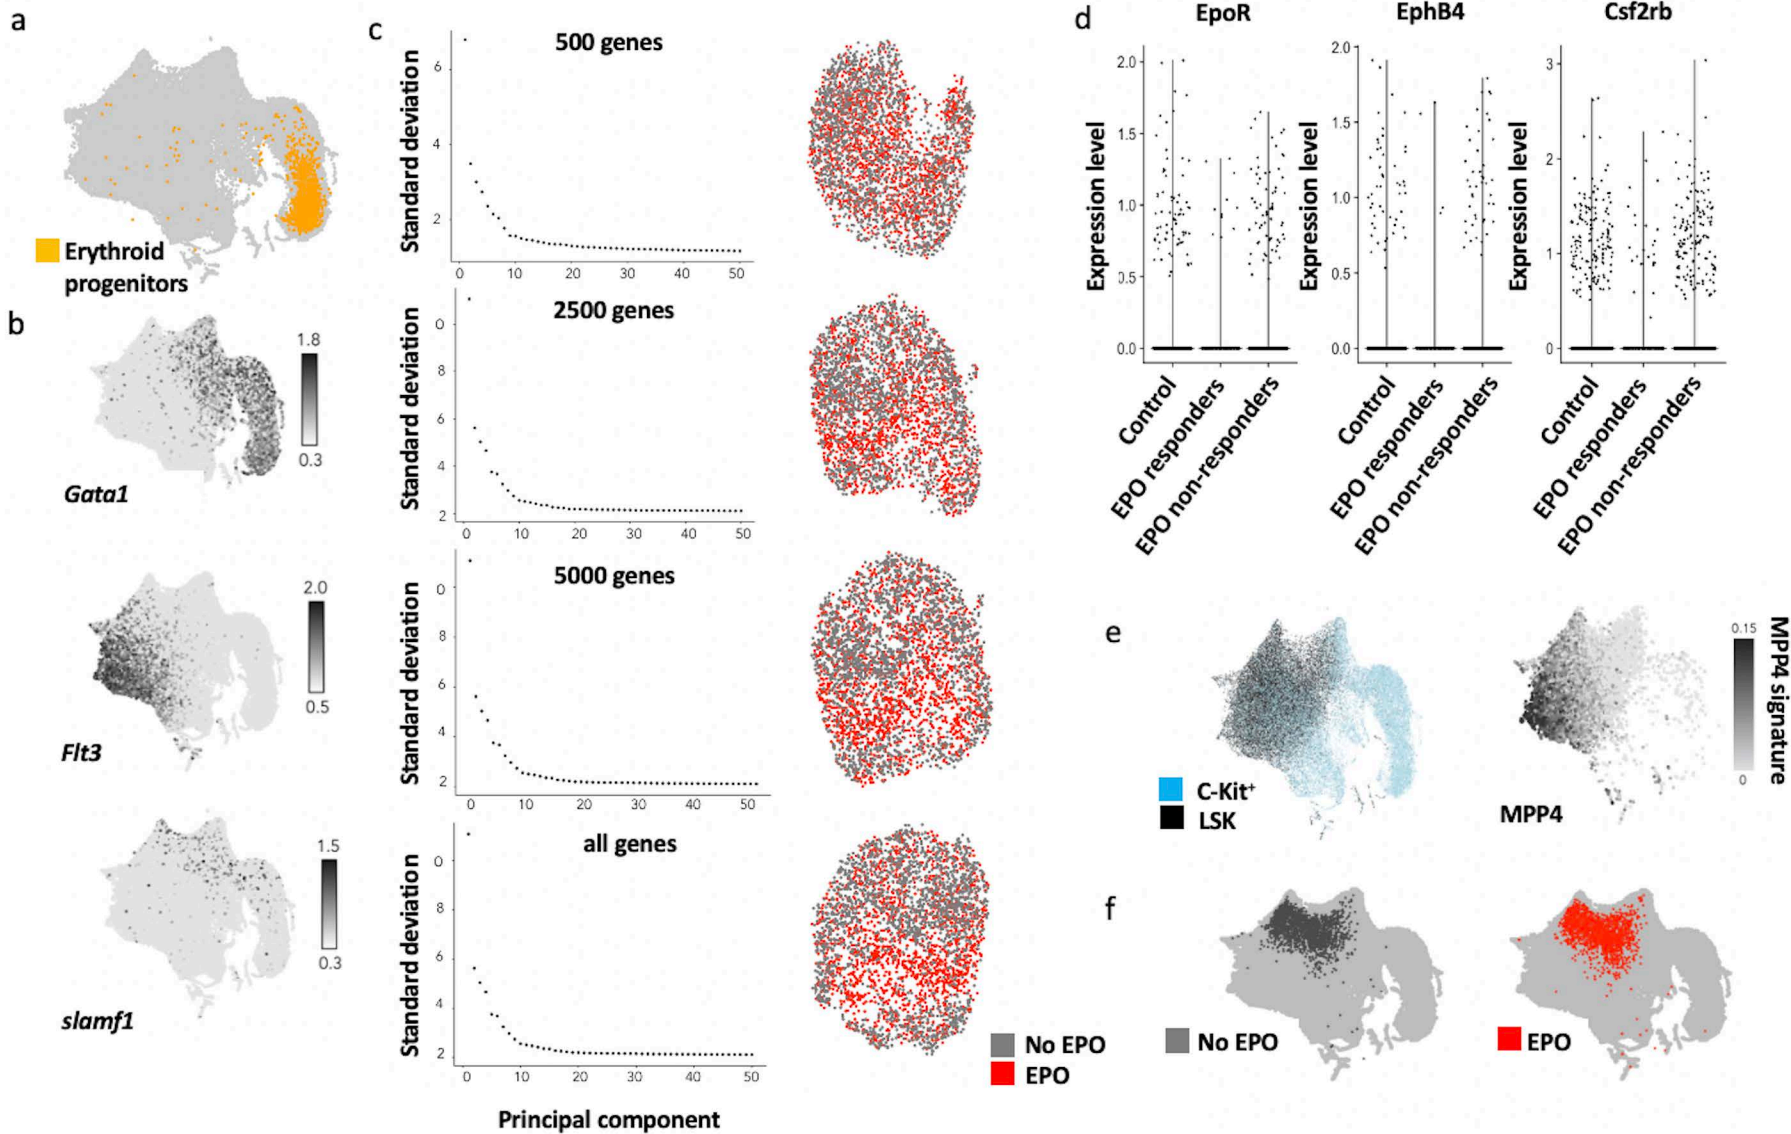

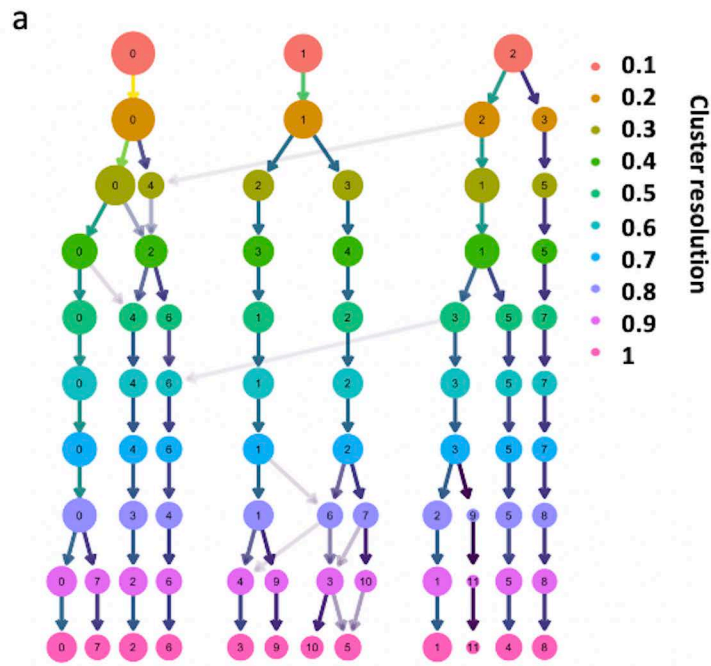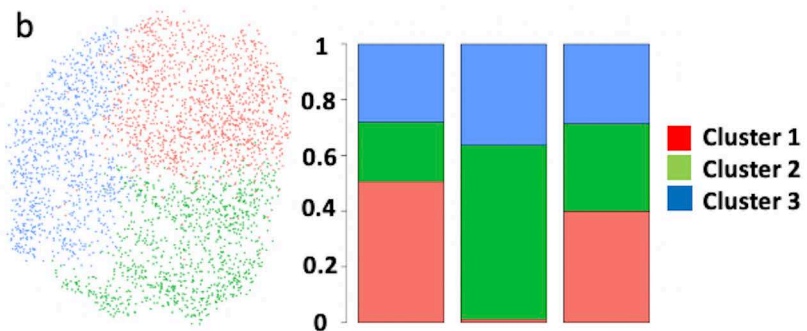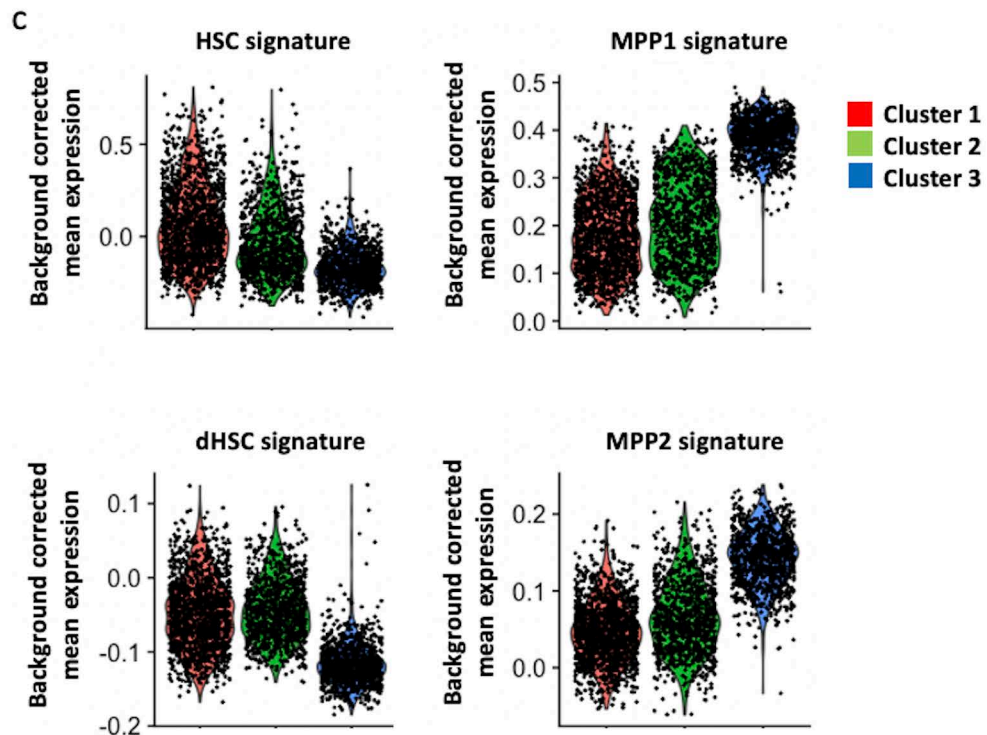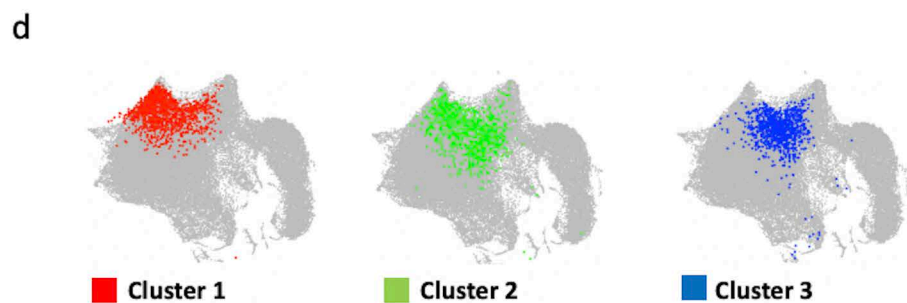

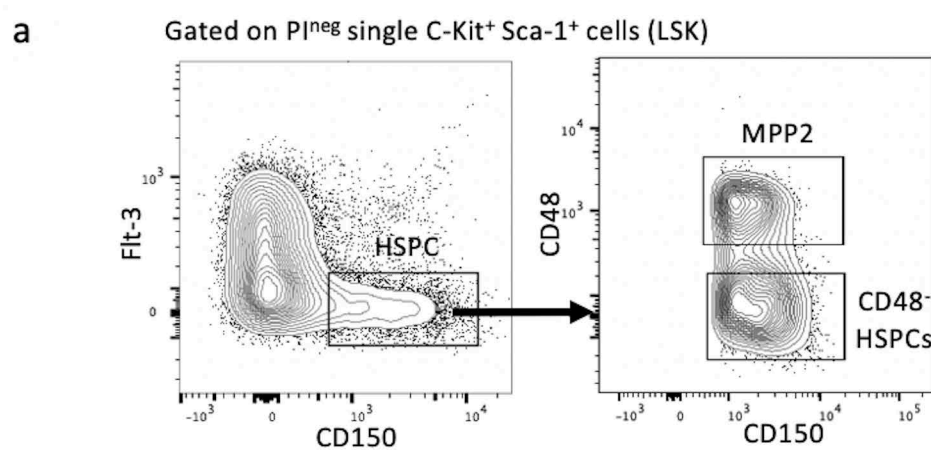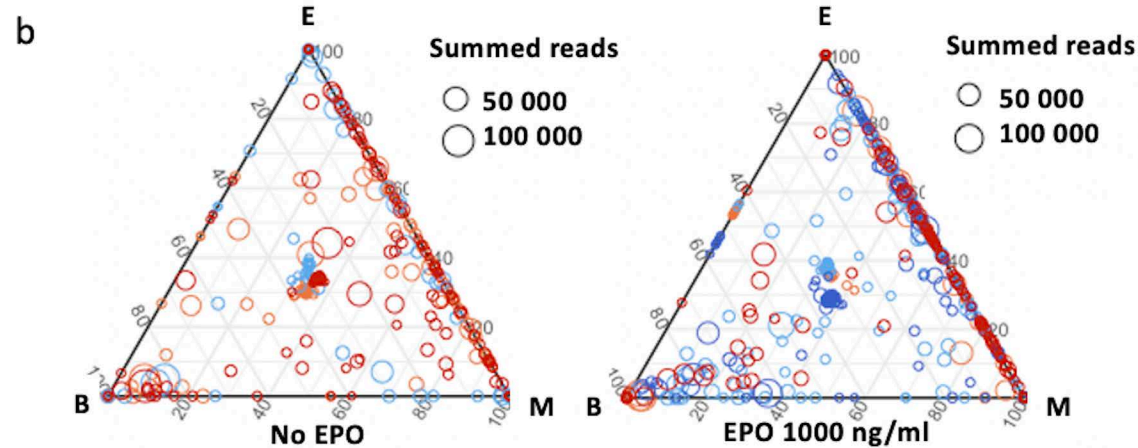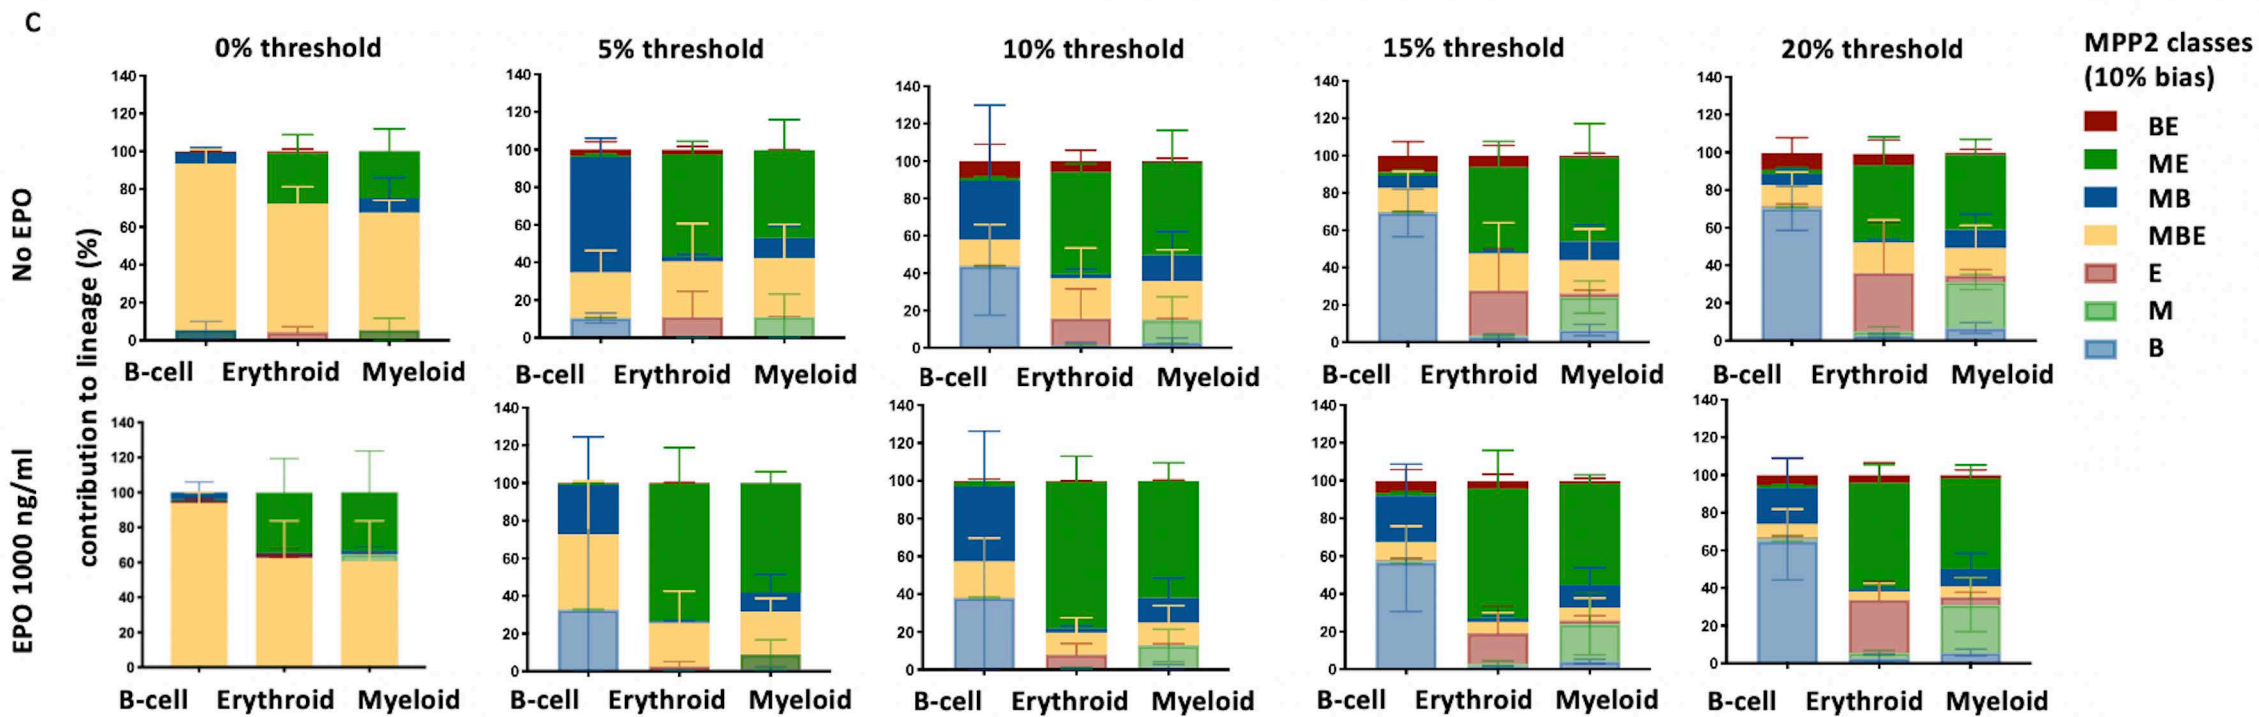

**Supplementary File 1: Permutation testing of changes in clonality after transplantation of EPO-exposed HSPCs.** Same data as in Figure 1 figure supplement 4 and Figure 1 figure supplement 3. HSPCs were cultured with EPO (1,000 ng/ml) for 16h. Barcodes in the erythroid (E), myeloid (M), B-lymphoid (B) lineage, dendritic cell (DC) and HSPCs, were analyzed four weeks after transplantation and categorized by bias using a 10% threshold. The output of MB and ME classified barcodes to the B, M, and E lineages was analyzed using a permutation test. By permutating the mice of control and EPO groups, the random distribution of this output was generated and compared to the real output difference between control and EPO group. A p-value was generated using permutation testing.

| Figure 1 figure supplement | Condition                            | p-value |         |         |         |
|----------------------------|--------------------------------------|---------|---------|---------|---------|
|                            |                                      | MB in B | MB in M | ME in E | ME in M |
| 3                          | HSPCs 1000 ng/ml repeat              | 0.01    | 0.0083  | 0.0087  | 0.0087  |
| 4                          | HSPCs 1000 ng/ml - 6 weeks timepoint | 0.01    | 0.01    | 0.0138  | 0.0185  |
